# Supplementary material
Source: ML conference proceedings conference paper supplement (https://openreview.net/forum?id=ebe9uW2yQA)
Supplement: supplementary_material [file event_count_br.xlsx]

## Sheet: Events
	1-put_onion_on_X_by_agent0	1-put_tomato_on_X_by_agent0	1-put_dish_on_X_by_agent0	1-put_soup_on_X_by_agent0	1-pickup_onion_from_X_by_agent0	1-pickup_onion_from_O_by_agent0	1-pickup_tomato_from_X_by_agent0	1-pickup_tomato_from_T_by_agent0	1-pickup_dish_from_X_by_agent0	1-pickup_dish_from_D_by_agent0	1-pickup_soup_from_X_by_agent0	1-USEFUL_DISH_PICKUP_by_agent0	1-SOUP_PICKUP_by_agent0	1-PLACEMENT_IN_POT_by_agent0	1-viable_placement_by_agent0	1-optimal_placement_by_agent0	1-catastrophic_placement_by_agent0	1-useless_placement_by_agent0	1-potting_onion_by_agent0	1-potting_tomato_by_agent0	1-cook_by_agent0	1-delivery_by_agent0	1-deliver_size_two_order_by_agent0	1-deliver_size_three_order_by_agent0	1-deliver_useless_order_by_agent0	1-STAY_by_agent0	1-MOVEMENT_by_agent0	1-IDLE_MOVEMENT_by_agent0	1-IDLE_INTERACT_by_agent0	0-put_onion_on_X_by_agent1	0-put_tomato_on_X_by_agent1	0-put_dish_on_X_by_agent1	0-put_soup_on_X_by_agent1	0-pickup_onion_from_X_by_agent1	0-pickup_onion_from_O_by_agent1	0-pickup_tomato_from_X_by_agent1	0-pickup_tomato_from_T_by_agent1	0-pickup_dish_from_X_by_agent1	0-pickup_dish_from_D_by_agent1	0-pickup_soup_from_X_by_agent1	0-USEFUL_DISH_PICKUP_by_agent1	0-SOUP_PICKUP_by_agent1	0-PLACEMENT_IN_POT_by_agent1	0-viable_placement_by_agent1	0-optimal_placement_by_agent1	0-catastrophic_placement_by_agent1	0-useless_placement_by_agent1	0-potting_onion_by_agent1	0-potting_tomato_by_agent1
1	0	0.02	0.99	0	20.24	0	0.01	11.03	11.21	0	0	0	10.1	30.99	30.99	30.99	0	0	19.97	11.02	10.36	10.01	0.36	9.65	0	37.03	243.96	0	0	33.76	0.02	15.96	0	0.38	33.56	0	0.03	0.19	16.03	0	15.99	0	0	0	0	0	0	0	0
2	0.01	3.52	4.78	7.18	0.05	0	3.38	11.71	9.92	0	2.4	0	5	11.38	11.31	11.31	0.07	0	0.04	11.34	5.34	0	0	0	0	29.52	295.79	0	0	35.92	0	17.06	0	0.02	35.99	0	0	0.06	17	0	17	0	0	0	0	0	0	0	0
3	0	0	0.03	0.01	10.01	0	0	19.99	9.04	0	0	0	9	30	30	30	0	0	10.01	19.99	9.99	8.99	0	8.99	0	49.94	248.61	0	0	32.86	0.05	15.99	0	0.14	33.17	0.03	0.02	0.09	15.92	0	15.89	0	0	0	0	0	0	0	0
4	0.06	0.07	0.1	0.01	19.53	0	0.04	10.21	9.16	0	0	0	9.03	29.59	29.58	29.58	0.01	0	19.42	10.17	9.85	8.97	0.07	8.9	0	56.68	242.8	0	0	31.28	0	10.41	0	1.08	30.43	0	0	0.91	9.77	0	9.71	0	0	0	0	0	0	0	0
5	0	0.05	0.02	0	21.94	0	0.05	11.02	10.03	0	0	0	9.99	32.94	32.93	32.93	0.01	0	21.94	11	10.97	9.99	0	9.99	0.01	45.2	236.52	0	0	31.82	0	10.43	0	0.11	31.98	0	0	0.43	10	0	9.96	0	0	0	0	0	0	0	0
6	0.04	0	0.02	0	17.05	0	0	15.62	15.7	0	0	0	15.62	32.41	32.41	32.41	0	0	16.89	15.52	15.94	15.33	15.25	0.08	0	24.96	236.73	0	0	31.98	0	11.78	0	0.05	32.53	0	0	1.78	10	0	10	0	0	0	0	0	0	0	0
7	0.04	0.06	0.11	0.06	2.26	0	0.02	3.31	1.75	0	0.01	0	1.62	5.44	5.44	5.44	0	0	2.21	3.23	1.73	1.56	0.16	1.4	0	90.67	287.36	0	0	33.04	0	10	0	0.09	32.95	0	0	0.01	10.66	0	10.66	0	0	0	0	0	0	0	0
17	0	0	0	0	10.02	0	0	20.01	9.93	0	0	0	9.39	30.02	30.02	30.02	0	0	10.02	20	10	9.02	0.02	9	0	40.75	248.75	0	0	0.45	0.4	6.76	3.85	0.34	0.17	0.19	0.21	1.6	5.83	4.03	5.24	0	0	0	0	0	0	0	0
26	0	0	0	0	10.96	0	0	20.08	10.04	0	0	0	10	30.96	30.96	30.96	0	0	10.96	20	10.88	9.96	0.96	9	0	50.4	229.23	0	0	1.67	0.27	4.04	0.43	1	0.7	0.16	0.12	1.86	2.34	0.51	1.98	0	0	0	0	0	0	0	0
28	0	0.02	0.29	0	9.99	0	0.02	19.99	9.31	0	0	0	8.99	29.97	29.97	29.97	0	0	9.99	19.98	9.99	8.99	0	8.99	0	31.19	259.91	0	0	0.5	0.18	9.26	2.4	0.33	0.27	0.1	0.11	5.43	4.04	2.52	3.91	0	0	0	0	0	0	0	0
32	0	0	0.01	0	17.02	0	0	17.91	16.94	0	0	0	16.93	34.45	34.45	34.45	0	0	16.97	17.48	16.97	16.92	16.9	0.02	0	16.78	240.47	0	0	32.62	0	15.01	0	0.63	32.06	0	0	0.01	15	0	15	0	0	0	0	0	0	0	0
33	0	0.05	1.47	6.87	0.01	0	0.07	15.78	8.34	0	0.98	0	6.86	15.81	15.74	15.74	0.07	0	0.01	15.8	6.88	0	0	0	0	65.78	256.18	0	0	29.49	0.06	13.45	0	1.21	28.74	0.04	0.03	4.44	9.03	0	8.88	0	0	0	0	0	0	0	0
34	0	0	0.74	0	21.98	0	0	11.01	10.84	0	0	0	10.02	32.98	32.98	32.98	0	0	21.98	11	11	10.01	0.01	10	0	36.01	242.76	0	0	31.45	0	10.64	0	0.1	31.71	0	0	0.68	9.96	0	9.95	0	0	0	0	0	0	0	0
35	0.02	2.41	1	4.51	0.08	0	2.42	10.13	4.61	0	1.38	0	3.41	10.05	9.51	9.51	0.54	0	0.04	10.01	4.03	0	0	0	0	54.3	294.51	0	0	32	0	10.71	0	0	32.97	0	0	0.71	10	0	10	0	0	0	0	0	0	0	0
36	0.02	0	0.62	0	10.03	0	0	20	10.59	0	0	0	9.82	30	30	30	0	0	10	20	9.99	9	0	9	0	39.73	246.53	0	0	33.31	0	10.22	0	0.36	32.97	0	0	0.2	10.95	0	10.95	0	0	0	0	0	0	0	0
37	0.01	0	0.73	0	21.98	0	0	11	10.77	0	0	0	10.01	32.95	32.95	32.95	0	0	21.95	11	10.97	10.01	0.02	9.99	0	67.14	213.7	0	0	33.26	0.03	10.53	0	0.28	33.01	0.02	0.01	0.51	10.7	0	10.7	0	0	0	0	0	0	0	0
38	0	0	0.04	0	22	0	0	11	10.04	0	0	0	10	33	33	33	0	0	22	11	11	10	0	10	0	49.27	229.13	0	0	31.95	0	10.88	0	0.04	32.19	0	0	0.88	10	0	10	0	0	0	0	0	0	0	0
39	0.01	0	0.07	0	21.98	0	0.01	11.01	10.07	0	0	0	10	32.99	32.99	32.99	0	0	21.97	11.02	10.99	10	0.01	9.99	0	35.77	249.98	0	0	13.94	0.02	5.4	0	2.06	12.13	0.01	0.01	0.37	5.21	0	4.94	0	0	0	0	0	0	0	0
40	0.01	0	0.38	0	10.84	0	0.02	19.09	10.35	0	0	0	9.04	29.93	29.93	29.93	0	0	10.83	19.1	9.99	9.02	0.03	8.99	0	29.78	253.9	0	0	35.44	0	17	0	0.08	35.81	0	0	0.01	16.99	0	16.99	0	0	0	0	0	0	0	0
41	0	0	0.08	0.02	21.39	0	0	10.85	10.06	0	0	0	9.98	31.86	31.86	31.86	0	0	21.08	10.78	10.3	9.95	0.01	9.94	0	36.99	247.03	0	0	34.08	0	16.04	0	0.08	34	0	0	0.04	16.75	0	16.75	0	0	0	0	0	0	0	0
43	0.2	0	0.22	0.06	21.92	0	0	10.79	10.17	0	0.05	0	9.88	32.47	32.47	32.47	0	0	21.69	10.78	10.82	9.85	0	9.85	0	40.81	235.51	0	0	35.7	0	17	0	0.07	35.94	0	0	0.02	16.99	0	16.99	0	0	0	0	0	0	0	0
44	0	0	0.1	0	21.98	0	0	11.01	10.18	0	0	0	10	32.97	32.97	32.97	0	0	21.97	11	10.99	10	0.01	9.99	0	62.56	223.01	0	0	33.58	0.04	16.29	0	0.39	33.5	0.02	0.02	0.29	16.05	0	16.03	0	0	0	0	0	0	0	0
46	0	4.55	2.1	5.95	0	0	4.44	12.1	6.74	0	1.7	0	4.47	11.79	11.74	11.74	0.05	0	0	11.79	5	0	0	0	0	62.56	268.51	0	0	20.03	0	11	0	0.05	20.09	0	0	0.12	10.92	0	10.88	0	0	0	0	0	0	0	0
49	0	0.42	8.22	8.25	0	0	0.36	9.76	12.32	0	4.46	0	3.92	9.46	9.21	9.21	0.25	0	0	9.46	4.4	0.01	0	0	0.01	57.14	267.95	0	0	10.74	0	12.94	0	0.73	10.43	0	0	2.94	10	0	9.99	0	0	0	0	0	0	0	0
51	0.05	1.32	1.23	4.87	0.08	0	1.13	11.33	4.1	0	2.3	0	2.64	10.91	8.74	8.74	2.17	0	0.02	10.89	3.26	0	0	0	0	51.04	298.55	0	0	10.02	0.09	10.41	0	0.04	9.98	0.08	0.02	0.7	9.97	0	9.91	0	0	0	0	0	0	0	0
55	0	0	0.1	0	21.94	0	0.01	11.03	10.15	0	0	0	10.04	32.95	32.95	32.95	0	0	21.94	11.01	10.99	10.04	0.04	10	0	36.51	227.94	0	0	15.77	0.12	15.85	0	0.73	15.3	0.06	0.06	1.39	15.02	0	14.96	0	0	0	0	0	0	0	0
58	0.03	0.08	0.29	0	20.13	0	0.09	10.87	10.18	0	0	0	9.89	30.62	30.62	30.62	0	0	19.85	10.77	9.95	9.88	0.05	9.83	0	42.33	245.17	0	0	3.99	0.45	6.74	2.63	1.45	2.63	0.18	0.3	1.52	5.59	3.04	4.97	0	0	0	0	0	0	0	0
60	0.01	1.04	1.61	3.61	0.02	0	0.7	6.13	4.06	0	1.51	0	2.28	5.53	5.3	5.3	0.23	0	0.01	5.52	2.75	0.01	0	0	0.01	70.63	296.29	0	0	19.43	0.08	21.67	0	7.31	12.24	0.04	0.05	11.31	10.61	0	10.44	0	0	0	0	0	0	0	0
61	0	0	0.22	0.06	20.15	0	0	10.97	10.22	0	0.05	0	9.99	30.79	30.79	30.79	0	0	20	10.79	10.01	9.98	0.02	9.96	0	43.06	237.74	0	0	13	0.04	13.91	0	2.95	10.06	0.02	0.02	3.98	9.99	0	9.5	0	0	0	0	0	0	0	0
63	0.04	0.01	0.42	0.28	11.52	0	0.02	18.54	10.2	0	0.27	0	9.55	29.85	29.84	29.84	0.01	0	11.42	18.43	9.93	9.31	0.03	9.28	0	30.48	255.23	0	0	18.57	0	16.44	0	1.64	16.97	0	0	0.28	16.69	0	16.64	0	0	0	0	0	0	0	0
65	0.82	0	0.14	0.01	21.57	0	0	11.51	10.8	0	0.01	0	10.56	32.1	32.1	32.1	0	0	20.62	11.48	11.16	10.52	1.81	8.71	0	38.42	243.01	0	0	20.62	0	11.89	0	0.04	20.71	0	0	1.6	10.33	0	10.22	0	0	0	0	0	0	0	0
67	0	0.07	0.74	0	9.99	0	0.06	19.99	9.93	0	0	0	9.01	29.97	29.97	29.97	0	0	9.99	19.98	9.98	9.01	0.01	9	0	32.89	246.25	0	0	20.44	0.05	13.55	0	0.9	19.89	0.01	0.04	3.79	9.91	0	9.67	0	0	0	0	0	0	0	0
70	0.01	0	1.15	0.03	9.95	0	0.01	19.94	10.72	0	0	0	8.97	29.86	29.86	29.86	0	0	9.93	19.93	9.95	8.94	0	8.94	0	36.12	244.07	0	0	17.68	0.02	16.17	0	0.72	17	0.01	0.01	0.16	16.93	0	16.92	0	0	0	0	0	0	0	0
71	0.01	0	2.78	0.01	19.62	0	0	11.37	12.8	0	0	0	10.01	30.71	30.71	30.71	0	0	19.5	11.21	10.17	9.98	0.26	9.72	0	31.14	232.69	0	0	17.5	0.04	17.19	0	0.55	16.96	0.02	0.02	0.69	16.78	0	16.75	0	0	0	0	0	0	0	0
[truncated: 9 more columns]
