# Supplementary material
Source: ML conference proceedings conference paper supplement (https://openreview.net/forum?id=ebe9uW2yQA)
Supplement: supplementary_material [file event_count_br.xlsx]

## Sheet: Events
	1-put_onion_on_X_by_agent0	1-put_dish_on_X_by_agent0	1-put_soup_on_X_by_agent0	1-pickup_onion_from_X_by_agent0	1-pickup_onion_from_O_by_agent0	1-pickup_dish_from_X_by_agent0	1-pickup_dish_from_D_by_agent0	1-pickup_soup_from_X_by_agent0	1-USEFUL_DISH_PICKUP_by_agent0	1-SOUP_PICKUP_by_agent0	1-PLACEMENT_IN_POT_by_agent0	1-delivery_by_agent0	1-STAY_by_agent0	1-sparse_r_by_agent0	0-put_onion_on_X_by_agent1	0-put_dish_on_X_by_agent1	0-put_soup_on_X_by_agent1	0-pickup_onion_from_X_by_agent1	0-pickup_onion_from_O_by_agent1	0-pickup_dish_from_X_by_agent1	0-pickup_dish_from_D_by_agent1	0-pickup_soup_from_X_by_agent1	0-USEFUL_DISH_PICKUP_by_agent1	0-SOUP_PICKUP_by_agent1	0-PLACEMENT_IN_POT_by_agent1	0-delivery_by_agent1	0-STAY_by_agent1	0-sparse_r_by_agent1
1	0	0.37	0	0	24	7.37	0	0	0	7	24	7	24.02	140	0	0.44	0	0	24	7.48	0	0	0	7	23.99	7	23.89	140
2	0	0.03	0	0	24	0.03	7	0	7	7	24	7	9.76	140	0	0.01	0	0	24	0.01	7.14	0	7.14	7	24	7	10.98	140
3	0	0	0	0	18.37	0	15.99	0	15.99	15.99	17.94	15.99	0.38	319.8	0.03	0	0	0.02	18.82	0	16	0	16	16	17.99	16	0.37	320
4	0.4	4.01	0.02	0.39	14.4	4.01	11.94	0.01	11.92	11.93	13.52	11.88	18.29	237.6	0.04	3.2	0.02	0.03	15.26	3.19	12.01	0.02	11.99	11.99	14.36	11.95	17.38	239
5	0	0.27	0	0	24	0.3	7.01	0	7	7	24	7	16.43	140	0	0.33	0	0	24	0.33	7.83	0	7.83	7	24	7	16.84	140
6	8.97	0	0	0	18.13	0	16	0	16	16	9.02	16	20.93	320	7.96	0	0	0	18.44	0	15.99	0	15.99	15.99	10.03	15.99	19.43	319.8
7	0.43	0.68	0	0.41	23.83	0.69	7.06	0	7.03	6.93	23.8	6.93	22.15	138.6	0.77	0.81	0	0.76	23.87	0.81	7.91	0	7.9	6.95	23.86	6.95	22.88	139
8	0.2	0	0	0.19	17	0	15.95	0	15.95	15.76	16.98	14.96	5.42	299.2	0	0	0	0	17	0	16	0	16	16	17	15	5.75	300
9	0	0.02	0	0	16	0.02	15	0	15	14	16	14	11.87	280	0	0.04	0	0	17	0.04	14.11	0	14.11	14	17	14	11.42	280
10	16.51	0.01	0	0.01	26.78	0.01	16.79	0	16.78	16.64	9.99	16.44	0.69	328.8	16.91	0	0.03	0.02	27.21	0	16.85	0.02	16.85	16.71	9.97	16.46	0.55	329.2
11	8.73	0	0	0.14	17.76	0	15.79	0	15.79	15.79	8.94	15.78	8.66	315.6	7.86	0.02	0	0	18.18	0.02	15.99	0	15.99	15.98	9.99	15.96	7.13	319.2
12	0	0	0	0	17	0	16	0	16	15.87	17	15	0.42	300	0.01	0	0.01	0.01	17	0	16	0.01	16	15.99	17	15	0.32	300
13	0	0.02	0	0	17	0.01	15.99	0	15.96	15.82	16.99	14.99	2.49	299.8	0	0	0.01	0	17	0	15.98	0.01	15.98	15.95	17	14.98	2.37	299.6
14	8.96	0.02	0.01	0.01	18.7	0.01	16	0.01	15.85	15.99	9	15.97	20.42	319.4	7.94	0.13	0.05	0.62	17.13	0.11	14.7	0.05	14.52	14.6	9.4	14.54	18.41	290.8
15	8.83	79.49	0.01	9.15	7.94	78.97	6.37	0.01	4.84	5.41	8.13	5.31	2.89	106.2	6	87.57	0.01	6.39	7.64	86.96	6.07	0.01	4.39	5.1	7.8	5.04	3.04	100.8
16	0.63	0.27	0.03	0.58	15.21	0.25	14.52	0.01	14.28	14.34	14.87	14.17	2.73	283.4	0.27	0.06	0.01	0.26	18.14	0.05	15.91	0.01	15.9	15.86	17.75	15.84	1.12	316.8
17	0.59	0.43	0.1	0.39	15.87	0.29	14.32	0.07	14.03	13.68	15.57	13.59	3.26	271.8	0.69	0.4	0.16	0.54	15.89	0.35	14.28	0.14	14.1	13.61	15.68	13.54	3.61	270.8
18	0.01	0	0	37.98	15.99	0	0	0	0	0	52.99	0	21.06	0	0	0.03	0	36.85	16.99	0.03	0	0	0	0	52.91	0	19.05	0
19	0.01	0.01	0	26.51	0	0.01	10.94	0	10.94	10	26.49	9.99	11.07	199.8	0.03	0	0	25.61	1	0	10.97	0	10.97	10.03	26.58	10	9.99	200
20	0	1.52	0	0	25.21	3.47	0	0	0	1.95	24.8	1.93	31.99	38.6	0	1.46	0	0	25.78	3.43	0	0	0	1.97	25.08	1.97	31.41	39.4
21	0.01	0.28	0.05	0.01	16.93	0.29	13.85	0.05	13.85	13.86	16.8	13.86	7.83	277.2	0.02	0.19	0	0.01	17.05	0.19	14.07	0	14.07	13.99	17	13.96	8.06	279.2
22	0.39	0.04	0	30.22	0.07	0.04	9.94	0	9.94	8.97	29.89	8.97	17.93	179.4	0.39	0.05	0	29.3	1.04	0.05	9.97	0	9.97	8.99	29.95	8.99	18.99	179.8
23	8	0.07	0	7	25	0.07	8	0	8	8	24	7.99	9.98	159.8	8.04	0.11	0	7.04	25.97	0.11	8	0	8	8	24	8	9.63	160
24	0	1.65	0	0	24	8.68	0.01	0	0	7	24	7	25.7	140	0	1.71	0	0	24	9.39	0	0	0	7	24	7	26.42	140
25	0.44	1.48	0	0.42	23.9	1.43	7.92	0	7.92	6.97	23.87	6.96	12.76	139.2	0	1.69	0	0	23.96	1.63	7.98	0	7.98	6.99	23.96	6.99	13.35	139.8
26	0.02	0.01	0	0	16.65	0.01	15.97	0	15.97	15.94	15.98	15.86	1.61	317.2	0	0	0	0	18	0	16	0	16	16	17	16	0.23	320
27	0	0.05	0	0	28.99	9.05	0	0	0	9	28.96	9	8.21	180	0.01	0.04	0	0.01	29.9	9.04	0	0	0	9	28.99	9	8.06	180
28	9	0.04	0	0	29	0.04	9	0	9	9	20	9	6.12	180	9.02	0.02	0	0.02	29.99	0.02	9	0	9	9	20	9	6.39	180
29	0.06	0.03	0	0.04	23.89	0.03	6.99	0	6.99	6.97	23.76	6.97	16.89	139.4	0.38	0.07	0	0.32	23.78	0.07	7.45	0	7.45	6.92	23.66	6.91	17.65	138.2
30	0.01	2.95	0.21	0.01	20.96	2.93	6.85	0.21	6.84	6.59	20.75	6.21	7.72	124.2	0.02	0.56	0.07	0.02	21.46	0.55	6.98	0.07	6.98	6.75	21.19	6.41	26.17	128.2
31	13.96	0	0	8.01	22.99	0	15	0	15	15	17	15	5.14	300	13.81	0	0	8.14	22.98	0	15	0	15	15	17.15	14.98	5.88	299.6
32	0	1.36	0	0	23.91	8.37	0	0	0	7	23.84	6.99	9.93	139.8	0	0.72	0	0	24.01	7.85	0	0	0	7	24	7	10.43	140
33	9	0.01	0	0	29	0.01	9	0	9	9	20	9	1.15	180	9	0	0	0	29.92	0	9	0	9	9	20	9	1.07	180
34	0	0	0	0	17	0	16	0	16	16	17	15.01	4.5	300.2	0	0	0	0	17	0	16	0	16	15.99	17	15.85	4.74	317
35	0.04	24.09	0.02	0.05	21.19	36.81	0.01	0.02	0	12.53	20.86	12.37	17.67	247.4	0.03	6.19	0.01	0.03	24.29	20.45	0	0.01	0	14.2	24.06	13.96	15.19	279.2
36	0	0.98	0	0	24	7.98	0	0	0	7	23.98	7	26.63	140	0	0.68	0	0	24	7.86	0	0	0	7	24	7	28.59	140
37	4.46	0.67	0.03	3.27	10.16	0.67	7.86	0.02	7.78	7.8	8.41	7.67	13.85	153.4	6.51	0.39	0.02	5.34	11.11	0.4	7.87	0.02	7.63	7.72	9.45	7.57	11.53	151.4
38	0.02	0.35	0	0.64	13.06	0.35	11.98	0	11.98	11.89	12.98	11.77	30.03	235.4	0.01	0.36	0	0	14	0.36	12	0	12	12	13	12	29.7	240
39	0.01	1	0	0.01	24.33	8.02	0	0	0	7	24.3	7	16.57	140	0	0.89	0	0	24.29	7.98	0.01	0	0	7	24.27	7	17.13	140
40	10.07	0	0	9.88	31.99	0	0	0	0	0	30.98	0	21.02	0	10.15	0	0	10.15	32	0	0	0	0	0	31.98	0	21.83	0
41	0.09	0.02	0	0.03	18.66	0.02	15.99	0	15.99	15.96	17.94	15.93	0.11	318.6	0.22	0.02	0	0.13	18.72	0.02	15.83	0	15.83	15.82	17.79	15.78	0.56	315.6
42	0.12	0.02	0	0.13	16.97	0.02	15.94	0	15.9	15.89	16.98	14.94	4.02	298.8	0	0	0.01	0	17	0	16	0.01	16	16	17	15.02	3.8	300.4
43	0.1	0	0.01	0.1	17.99	0	16	0.01	16	16	16.99	16	5.26	320	0.01	0	0	0	18.94	0	15.97	0	15.97	15.96	18.92	15.96	0.18	319.2
44	0.12	0.04	0.02	40.32	0.01	0.02	12.56	0	12.35	11.76	40.19	11.74	2.09	234.8	0.08	0.06	0.03	38.84	1.02	0.01	12.64	0.03	12.36	11.65	39.78	11.61	0.89	232.2
45	0	0	0.01	39.24	0.01	0	14.47	0	14.47	14.13	39.19	14	1.5	280	0	0	0	37.97	1	0	14.26	0	14.26	14.06	38.68	14	1.12	280
46	0.01	0.02	0.01	40.12	0	0.02	12	0.01	12	12	39.73	12	9.13	240	0	0.02	0	39.25	1	0.02	12	0	12	12	39.87	12	5.53	240
47	1.49	0.02	0	28.01	0.01	0.02	10.81	0	10.81	9.98	26.51	9.97	25.69	199.4	1.31	0.02	0	26.73	1	0.02	10.87	0	10.8	9.93	26.4	9.93	24.51	198.6
48	0	0.02	0	0	16.74	0.02	15.99	0	15.99	15.99	15.99	15.98	2.4	319.6	0	0.05	0	0	17.95	0.05	16	0	16	16	17.73	15.98	0.56	319.6
49	0.02	0.76	0	0.01	27.74	2.01	0	0	0	1.23	26.96	1.23	21.43	24.6	0.06	0.9	0	0.03	27.42	2.32	0	0	0	1.41	26.5	1.4	21.06	28
50	0.03	0	0	34.03	0	0	15.98	0	15.98	15.98	34	15.86	1.42	317.2	0	0	0.01	33.96	1	0	15.99	0.01	15.99	15.99	34.05	15.93	0.51	318.6
51	0	0.03	0	0	17	0.03	15.77	0	15.77	15	17	15	3.19	300	0	0.01	0	0	17	0.01	16	0	16	15	17	15	3.59	300
52	0	0.01	0	13.03	7.98	0.01	16.92	0	16.92	16	20.99	16	17.29	320	0	0	0	12.03	8.98	0	16.94	0	16.94	16.77	21.01	16	15.43	320
53	0	1.4	0	0	24	1.4	7	0	6.98	7	24	7	12.05	140	0	0.31	0	0	24	0.31	7.95	0	7.95	7	24	7	12.61	140
54	0.04	0.04	0	11.53	13.01	0.02	11.8	0	11.62	11.71	24.42	11.28	16.9	225.6	0.02	0.01	0	11.87	13.82	0.01	11.91	0	11.91	11.89	24.81	11.82	17	236.4
55	0	0.14	0	0	24	7.14	0	0	0	7	23.97	7	12.2	140	0	0.1	0	0	24	7.7	0	0	0	7	24	7	13.34	140
56	0.24	0.02	0	37.84	16.72	0	0.02	0	0.01	0	53.91	0	23.31	0	0.19	0	0	36.82	17.64	0	0	0	0	0	53.93	0	23.36	0
57	0.82	0.01	0.01	31.01	0.01	0.01	8.81	0.01	8.81	8.7	30.07	8.58	6.08	171.6	1.96	0.09	0.01	29.64	1.05	0.09	8.35	0.01	8.34	8.28	28.61	8.19	4.73	163.8
58	0.67	0.17	0.01	0.67	16.16	0.17	14.42	0	14.36	14.42	15.4	14.41	8.31	288.2	0	0.05	0	0	18.95	0.05	15.96	0	15.96	15.96	18.85	15.96	0.45	319.2
59	28.46	14.43	0.01	0.06	28.61	14.22	8.57	0.01	7.94	8.17	0	8.12	5.46	162.4	29.15	15.04	0.02	0.13	29.17	14.85	8.78	0.02	7.97	8.4	0	8.26	5.28	165.2
60	0	0.53	0	0	24	7.59	0	0	0	7	23.98	7	18.27	140	0	0.5	0	0	24	7.7	0	0	0	7	24	7	19.54	140
61	0.04	0	0.22	38.19	0	0	14.51	0.19	14.51	14.18	38.12	13.94	1.85	278.8	0.01	0	0.22	37.21	1	0	14.77	0.22	14.77	14.45	38.16	14.04	0.64	280.8
62	0.11	0.06	0	40.81	6.92	7.92	0.01	0	0	7.75	47.6	6.98	4.53	139.6	0.01	0.02	0.02	39.81	7.95	7.9	0	0.02	0	7.85	47.74	7.03	3.57	140.6
63	0	0	0	0	7.85	0	3	0	3	2.94	7.85	2.93	1.55	58.6	0	0	0	0.02	9.68	0	3.44	0	3.44	3.43	9.64	3.4	0.72	68
64	0	0.64	0	0	14	0.64	12	0	12	12	13	12	36.17	240	0	0.73	0	0	14.01	0.73	12	0	12	12	13.01	12	35.82	240
65	0	2.13	0	0	23.84	9.41	0	0	0	6.96	23.83	6.95	22.8	139	0	0.83	0	0	24	8.39	0	0	0	7	23.98	7	23.57	140
66	0	1.5	0	0	24	8.54	0	0	0	7	24	7	30.44	140	0	1.56	0	0	24	8.66	0	0	0	7	24	7	31.93	140
67	0.11	0.01	0.01	38.03	0	0.01	14.59	0	14.59	14.31	37.81	14	0.19	280	0.02	0.01	0.01	36.81	1.02	0.01	14.45	0.01	14.45	14.19	37.68	13.99	1.51	279.8
68	13.06	0.12	0	23.7	0.02	0.01	1.94	0	1.89	1.77	10.34	1.77	28.21	35.4	14.33	0.13	0	23.34	1.04	0.05	1.73	0	1.72	1.58	9.86	1.58	27.73	31.6
69	0.18	3.44	0	29.92	0.04	3.39	9.92	0	9.9	8.93	29.77	8.93	19.29	178.6	0.01	3.66	0	29	1.01	3.62	10	0	10	9	30	9	17.69	180
70	0.23	0.44	0	0.21	22.99	0.41	7	0	6.9	6.97	22.91	6.97	19.58	139.4	0	0.42	0	0	23.98	0.42	7	0	6.99	7	23	7	19.21	140
71	0.4	0.01	0	47.62	0	13.97	0	0	0	13.96	46.92	13.95	2.99	279	0.07	0.01	0	46.46	1.01	14.36	0.01	0	0	13.86	47.32	13.86	1.84	277.2
72	0.01	0	0	13.17	7.93	0	16.95	0	16.95	16.87	21.09	16	14.99	320	0.02	0	0	12.04	8.99	0	17	0	17	17	21.01	16	12.49	320
73	0	0.19	0	0	24	0.19	7.97	0	7.97	7	24	7	12.33	140	0	0.22	0	0	23.91	0.21	7.97	0	7.97	6.97	23.91	6.97	13.12	139.4
74	0.09	0.02	0.01	0.09	27.79	15.95	0	0.01	0	15.93	26.91	15.93	0.49	318.6	0.41	0.13	0	0.4	27.91	16.09	0	0	0	15.96	27.35	15.96	0.39	319.2
75	0.04	0.01	0	0.09	14.4	0.01	11.98	0	11.98	11.7	14.29	11.33	9.72	226.6	0	0.04	0	0.07	14.33	0.04	11.96	0	11.96	11.19	14.3	11.14	11.69	222.8
76	0.13	0	0	0.13	16.99	0	14.98	0	14.98	14	16.99	14	6.77	280	0.16	0	0	0.16	17	0	15	0	15	14	17	14	6.53	280
77	0.01	0	0	32.97	14.01	0	0	14	0	0	46.96	14	9.98	280	0	0.01	0.01	31.93	14.97	0	0.01	13.97	0.01	0	46.88	13.96	7.94	279.2
78	7.99	0	0	0	18	0	16	0	16	16	10.01	16	18.22	320	7.98	0	0	0.06	18.86	0.01	15.87	0	15.87	15.88	10.94	15.88	15.84	317.6
79	0.01	0.01	0	0.01	17	0.01	16	0	16	15.82	17	15	1.35	300	0.01	0.01	0	0.01	17.01	0.01	15.98	0	15.98	15.97	17	14.99	1.41	299.8
80	32.94	0.02	0	0	39.94	0.02	11.99	0	11.99	11.98	6.05	11.98	2.92	239.6	32.97	0.01	0	0	39.97	0.01	12	0	12	11.99	6.72	11.98	2.88	239.6
81	0.07	0	0	41.01	0.01	0.01	12.82	0	12.82	12	40.93	11.99	1.01	239.8	0.07	0	0	40.03	1.03	0	12.85	0	12.85	12	40.98	12	0.48	240
82	0	0.01	0	0	24	0.01	7.98	0	7.98	7	24	7	19.3	140	0	0.01	0	0	24	0.01	8	0	8	7	24	7	19.5	140
83	0.04	0.02	0	38.89	0.03	0.02	12	0	12	11.99	38.56	11.97	1.62	239.4	0.03	0.02	0	38.09	1.04	0.02	11.99	0	11.99	11.99	38.7	11.99	0.84	239.8
84	0.01	0	0.01	0	16.99	0	15.85	0.01	15.85	14.97	16.98	14.97	5.72	299.4	0.01	0.02	0	0.01	17.01	0.02	15.98	0	15.98	14.99	17.01	14.99	6.56	299.8
85	0.01	0	0	0.01	16.99	0	15.97	0	15.97	15.95	16.99	15.05	4.48	301	0	0	0.01	0.01	17.03	0	15.97	0.01	15.97	15.97	17	15.53	4.77	310.6
86	0	0	0	41	0	0	12.9	0	12.9	12	40.99	12	2.29	240	0	0	0	40	1	0	12.95	0	12.95	12	41	12	0.11	240
87	0.03	0	0.03	34.28	0	0	15.33	0.03	15.33	14.99	34.25	14.78	4.38	295.6	0.05	0	0.01	33.47	1	0	15.27	0.01	15.27	14.99	34.42	14.88	1.56	297.6
88	0.02	0	0.02	36.04	0	0	14.97	0.02	14.97	14.87	36	14	2.32	280	0	0	0.04	35.04	1	0	14.97	0.04	14.97	14.94	36.04	14.55	0.09	291
89	0	1.19	0	0	23.4	8.19	0	0	0	7	22.86	6.99	6.52	139.8	0	1.23	0	0	23.8	8.32	0	0	0	7	23.47	7	6.65	140
90	0.29	0	0	0.26	17.84	0	15.98	0	15.98	15.95	16.91	15.94	2.27	318.8	0.01	0	0	0	18.97	0	16	0	16	16	18.95	15.99	0.15	319.8
91	0.08	0.09	0.01	0.08	17.79	0.09	15.8	0.01	15.8	15.74	16.99	15.7	3.18	314	0.04	0.1	0	0.04	17.91	0.1	15.8	0	15.8	15.75	17.02	15.71	3.14	314.2
92	0	0.74	0	0	24	7.74	0	0	0	7	24	7	20.93	140	0	0.66	0	0	24	7.84	0	0	0	7	24	7	22.44	140
93	0	0.02	0	0	18.98	0.01	12	0	11.99	11.99	17.99	11.99	12.59	239.8	0	0.07	0	0	19.95	0.07	11.97	0	11.97	11.97	18.98	11.95	13.81	239
94	0.02	0	0.01	40.77	0.01	0	12.35	0.01	12.35	11.97	40.74	11.97	2.02	239.4	0.04	0	0	39.68	1.04	0	12.5	0	12.5	11.99	40.63	11.96	1.35	239.2
95	12	0	0	25	24	0	0	0	0	0	36	0	38.3	0	12.02	0	0	24.01	25	0	0	0	0	0	36	0	40.09	0
96	0	0.08	0	0	24	0.07	8	0	8	7	24	7	18.87	140	0	0.1	0	0	24	0.08	8	0	8	7	24	7	20.56	140
97	0.05	0	0	0.09	24.91	0	11.98	0	11.89	11.98	23.96	11.98	1.2	239.6	0	0	0	0	26	0	12	0	12	12	25	12	0	240
98	0.01	1.39	0	30.01	0	1.38	10	0	10	9.96	30	9	16.89	180	0	1.22	0	29	1	1.22	10	0	10	9.98	30	9	15.9	180
99	0.27	0	0	37.1	16.2	0	0.01	0	0.01	0	52.77	0	21.76	0	0.15	0.02	0	36.39	17.47	0.01	0.01	0	0.01	0	53.43	0	20.82	0
100	0.12	0.09	0	0.12	16.08	0.09	13.91	0	13.91	13.84	16.04	13	9.43	260	0.06	0.1	0	0.06	16.05	0.1	13.96	0	13.96	13.94	16.05	13.62	9.6	272.4
101	0.03	0	0	40.97	0.01	0	12.73	0	12.73	12	40.92	12	1.23	240	0.01	0	0	39.91	0.95	0	12.74	0	12.74	12	40.78	12	0.41	240
102	0	0	0	41	0	0	12.91	0	12.91	12	41	12	1.11	240	0.01	0	0	40	1	0	12.98	0	12.98	12	40.99	12	0.04	240
103	0.01	0	0.01	34.02	0.01	0	15.2	0.01	15.2	14.97	34.01	14.61	3.84	292.2	0.01	0	0	33.07	1	0	15.33	0	15.33	15	34.06	14.87	1.73	297.4
104	0	2.14	0	0	23.88	1.85	7.97	0	7.96	6.97	23.88	6.97	12.02	139.4	0	2.65	0	0	23.98	2.59	7.99	0	7.99	7	23.97	7	12.2	140
105	0.02	0.08	0	0.03	17.83	0.08	15.99	0	15.99	15.97	17.02	15.94	8.78	318.8	0.01	0.06	0.02	0.01	17.92	0.06	15.98	0.01	15.98	15.96	16.99	15.93	8.68	318.6
106	0	2.01	0	29.7	0.01	2.01	8.92	0	8.91	8.91	29.71	8.91	21.12	178.2	0	0.18	0	29	1	0.18	9	0	9	9	30	9	21.48	180
107	0.07	0.01	0.04	35.71	0	0.01	14.85	0.04	14.85	14.63	35.62	13.98	2.79	279.6	0	0	0.03	34.73	1	0	14.91	0.03	14.91	14.84	35.72	14.23	1.01	284.6
108	0.11	0	0	34.31	15.09	0	0	0	0	0	48.77	0	29.71	0	0.13	0	0	33.37	16.42	0	0	0	0	0	49.04	0	28.11	0
109	0	0.93	0	0	24	0.93	7.89	0	7.89	7	24	7	15.39	140	0	1.04	0	0	24	1.02	7.99	0	7.99	7	24	7	15.97	140
110	0	0.11	0	0	23	0.11	7	0	7	7	22.99	7	2.72	140	0	0.02	0	0	23.97	0.02	7	0	7	7	23	7	6.44	140
111	1.93	0.01	0	16.53	22.77	0.01	0.01	13.3	0.01	0	36.97	13.18	7.17	263.6	1.56	0.01	0	16	22.43	0	0.01	13.21	0.01	0	36.42	13.08	9.99	261.6
112	0.01	0	0	0.01	17	0	16	0	16	16	16.96	16	0.74	320	0.01	0.03	0	0	18.94	0.03	15.99	0	15.99	15.99	17.99	15.99	0.12	319.8
113	0	0.5	0	0	24	7.5	0	0	0	7	23.92	7	29.12	140	0	0.55	0	0	24	7.58	0	0	0	7	24	7	28.85	140
114	0	0	0	0	16.94	0	16	0	16	16	16	15.98	7.43	319.6	0	0	0	0	18	0	16	0	16	16	17	16	4.89	320
115	0	0	0.01	33.99	0	0	15.98	0.01	15.98	15.98	33.99	15.85	2.57	317	0	0	0	33.93	1.01	0	15.99	0	15.99	15.99	34.01	15.97	0.49	319.4
116	9	0.03	0	0	29	0.03	9	0	9	9	20	9	4.41	180	9.01	0.02	0	0.02	29.82	0.02	9	0	9	9	20.01	9	4.39	180
117	0.06	0	0.01	0.08	24.95	0	12	0.01	12	11.99	24.01	11.99	1.18	239.8	0.02	0	0	0.02	25.95	0	12	0	12	11.99	24.98	11.98	0.47	239.6
118	0.12	0	0	0.12	16	0	14.12	0	14.12	13.98	16	13.98	14.81	279.6	0.18	0.02	0.01	0.17	17	0.02	14.14	0.01	14.14	13.98	16.98	13.98	13.42	279.6
119	2.6	0.1	1.22	13.43	0.01	0.11	4.47	1.23	4.31	4.24	10.69	4.21	8.32	84.2	2.29	0.2	0.02	13.5	1.02	0.22	5.04	0.03	4.87	4.75	12.09	4.72	6.46	94.4
120	20.37	0.01	0.4	45.61	0.07	0	9.8	0.35	9.78	9.66	24.98	9.47	9.35	189.4	19.12	0.01	0.5	43.47	1.04	0.01	9.95	0.49	9.95	9.81	25.05	9.71	7.2	194.2
121	10.43	0	0	10.44	32.97	0	0	0	0	0	32.94	0	18.45	0	10.42	0	0	10.42	33	0	0	0	0	0	32.98	0	17.94	0
122	0.02	0	0	37.99	16.2	0	0	0	0	0	53.95	0	28.95	0	0	0	0	37	17.86	0	0	0	0	0	54	0	29.42	0
123	9.01	0.02	0	0.01	28.99	0.02	9	0	9	9	19.97	8.99	3.77	179.8	8.99	0.11	0	0	29.87	0.11	9	0	9	8.99	19.99	8.99	4.01	179.8
124	0.01	3.4	0	0.01	23.81	10.45	0	0	0	6.94	23.81	6.94	20.32	138.8	0	0.45	0	0	24	8.18	0	0	0	7	24	7	22.79	140
125	0.01	0	0	0	17.01	0	16	0	16	16	17	15	5.09	300	0	0	0.01	0	17	0	16	0.01	16	16	17	15.02	5.44	300.4
126	9.53	0	0	9.52	29.99	0	0	8.99	0	0	29.76	8.99	17.03	179.8	9.38	0	0	9.38	29.99	0	0	9	0	0	29.98	9	18.53	180
127	10.12	0	0	10.07	32	0	0	0	0	0	30.99	0	20.91	0	10.1	0	0	10.1	32	0	0	0	0	0	31.99	0	21.89	0
128	0.09	0	0	36.35	0	15.96	0	0	0	15.72	36.26	15	20.18	300	0.02	0	0	35.31	1	15.9	0.06	0	0.06	15.94	36.29	14.97	18.3	299.4
129	0.02	1.1	0	0.02	21.81	8.03	0	5.95	0	6.93	21.75	12.88	30.37	257.6	0.71	1.19	0	0.7	21.86	8.13	0	6.5	0	6.94	21.85	12.9	30.02	258
130	0	14.73	0	0	14.91	24.61	0	0	0	9.8	14.75	9.8	21.27	196	0	16.27	0	0	15.12	26.15	0	0	0	9.84	14.98	9.8	21.78	196
131	0.15	0	0	34.15	0	0	16	0	16	16	34	15	3.74	300	0	0	0	33	1	0	16	0	16	16	34	15.99	1.62	319.8
132	1	0	0	0	17	0	16	0	16	15.99	16	15	0.24	300	0.99	0	0	0	17	0	16	0	16	15.98	16.01	15	0.31	300
133	0.02	0.07	0.01	0	17.72	0.07	16	0.01	16	15.98	16.92	15.86	5.01	317.2	0	0	0	0	18	0	16	0	16	16	17	16	5.15	320
134	4.6	4.98	0.03	1.69	9.68	4.91	4.16	0.04	1.75	3.62	6.62	3.53	43.75	70.6	4.82	4.81	0.03	1.85	9.71	4.71	4.08	0.04	2.15	3.59	6.55	3.53	45.62	70.6
135	0.51	0	0	0.51	33.93	0	0	0	0	0	33.39	0	17.8	0	0.4	0	0	0.4	33.97	0	0	0	0	0	33.6	0	18.36	0
136	0.01	1.78	0	0	23.98	5.98	0	0	0	4.19	23.95	4.19	21.73	83.8	0	1.49	0	0	24	5.9	0	0	0	4.32	23.99	4.32	22.79	86.4
137	0	0.84	0	0	24	8.06	0	0	0	7	24	7	34.77	140	0	0.62	0	0	24	8.62	0	0	0	7	24	7	35.12	140
138	0.01	1.99	0	0	24	8.99	0	0	0	7	23.98	7	26.76	140	0.02	2.21	0	0.02	24	9.43	0	0	0	7	24	7	27.99	140
139	0.09	0.01	0	0.09	31.93	0.01	0	0	0	0	31.91	0	30.13	0	0.05	0	0	0.05	32	0	0	0	0	0	31.99	0	30.24	0
140	0	0	0	0	18.14	0	16	0	16	16	17.95	16	1.35	320	0	0	0.01	0	18.42	0	16	0.01	16	16	17.96	16	1.37	320
141	0.01	1.54	0	0	23.98	9.02	0	0	0	6.99	23.97	6.99	33.76	139.8	0	1.05	0	0	24	8.48	0	0	0	7	24	7	37.08	140
142	0	0.04	0	0	11.97	0.04	10.99	0	10.99	10.98	11.61	10.98	15.91	219.6	0	0	0	0	12.2	0	11	0	11	11	11.29	10.95	15.49	219
143	0.95	0.73	0.22	0.82	24.5	0.61	7.98	0.21	7.85	7.77	24	7.67	6.78	153.4	0.14	0.04	0	0.15	27.58	0.04	8.84	0.01	8.84	8.82	27.14	8.8	1.71	176
144	0.03	0	0	34.03	0.01	0	15.98	0	15.98	15.95	34.01	15.02	1.37	300.4	0	0	0	33.69	1	0	16	0	16	16	34	15.98	1.16	319.6
145	0	1.21	0.01	0	16.01	15.2	0.95	0.01	0.01	14.21	16	14	21.88	280	0.04	0.28	0.01	0.04	16.98	15.26	0	0.01	0	14.68	16.98	14.02	20.11	280.4
146	1.96	0	0.04	1.72	14.62	0	0	7.53	0	0	13.94	7.37	18.15	147.4	2.17	0.04	0.06	1.95	14.28	0.04	0	7.17	0	0	13.55	7.05	20.71	141
147	0	0.7	0	0	24	8.61	0	0	0	7	24	7	19.08	140	0	0.86	0	0	23.99	8.84	0	0	0	7	23.98	7	20.3	140
148	0	1.09	0	0	15.9	14.78	0.99	0	0	14.49	15.86	14.03	27.03	280.6	0.02	0.13	0.02	0.02	16.93	14.86	0	0.01	0	14.4	16.83	14.16	26.85	283.2
149	0	0.86	0	0	24	7.94	0	0	0	7	24	7	20.8	140	0	0.82	0	0	23.97	8.46	0	0	0	7	23.97	7	21.25	140
150	0	1.86	0	0	23.97	8.89	0	0	0	6.98	23.97	6.98	24.08	139.6	0	1.56	0	0	24	9.1	0	0	0	6.99	24	6.99	25.62	139.8
151	0.15	0	0	34.16	0.03	0	16	0	16	15.93	34.04	15.23	2.12	304.6	0.05	0	0.01	33.62	1.01	0	15.96	0.01	15.96	15.94	33.96	15.77	0.57	315.4
152	0.08	0	0	50.83	0.01	12.02	0	0	0	12	50.66	11.97	2.7	239.4	0.05	0	0.01	50.83	0.99	12.03	0	0.01	0	12.03	50.89	12.02	0.29	240.4
153	0.48	0	0.01	32.9	0	0	15.41	0.01	15.41	15.06	32.41	14.7	3.74	294	0.78	0	0	32.29	1	0	15.55	0	15.45	15.09	32.45	14.79	2.62	295.8
154	0	0.01	0	0	17.96	0.01	16	0	16	16	17	16	7.21	320	0	0.01	0	0	18	0.01	16	0	16	16	17	16	7.38	320
155	0.02	0	0	0	17.02	0	16	0	16	15.97	17	15	3.76	300	0.01	0	0	0.01	17	0	16	0	16	16	17	15	3.84	300
156	10.01	0	0	10.01	32	0	0	0	0	0	31	0	10.72	0	10.03	0	0	10.03	32	0	0	0	0	0	31.99	0	10.94	0
157	0	0	0	0	17	0	16	0	16	15.95	17	15	6.31	300	0	0	0	0	17	0	16	0	16	16	17	15	6.39	300
158	10.2	0.02	0	10.19	32.78	0.01	0.01	0	0	0	32.7	0	15.15	0	10.24	0.03	0	10.21	32.97	0.01	0.02	0	0	0	32.91	0	14.77	0
159	0	0.01	0	0	24	0.01	7.59	0	7.59	7	24	7	26.35	140	0	0.03	0	0	23.99	0.03	7.89	0	7.89	7	23.99	7	27.85	140
160	0.11	0.01	0	32.9	0.03	0.01	15.82	0	15.82	15.52	32.78	15.05	5.49	301	0.31	0.01	0	32.12	1.01	0.01	15.76	0	15.76	15.66	32.57	15.26	3.52	305.2
161	0.05	0	0	34.03	0.01	0	16	0	16	15.97	33.99	15.03	4.56	300.6	0	0	0	33.69	1	0	16	0	16	16	34	15.96	1.07	319.2
162	7.58	1.99	0.19	7.16	13.39	1.94	11	0.19	10.97	10.71	12.76	10.61	12.29	212.2	5.9	0.49	0.2	5.57	14.41	0.49	11.98	0.2	11.97	11.75	13.8	11.6	9.83	232
163	10.51	0	0.02	0.08	19.24	0.01	15.8	0.02	15.76	15.8	8.1	15.8	8.25	316	7.98	0	0.01	0.06	18.86	0.01	15.97	0.01	15.93	15.96	10.01	15.96	7.73	319.2
164	13.73	0	0	2.72	36	0	0	0	0	0	24	0	22.25	0	13.89	0	0	2.87	36.02	0	0	0	0	0	24	0	21.95	0
165	0.06	0.01	0.02	34.24	0	0	15.68	0.02	15.53	15.43	34.17	14.84	1.11	296.8	0.04	0	0	33.38	0.99	0	15.74	0	15.74	15.64	34.16	15.28	0.93	305.6
166	6.61	0	0	6.61	27.95	0	0	0	0	0	27.02	0	3.12	0	7.22	0	0	6.89	28.01	0	0	0	0	0	27.02	0	3.05	0
167	10.06	0	0	9.07	29.92	0	0	9	0	0	28	8.99	8.82	179.8	10.21	0	0	9.22	29.98	0	0	8.99	0	0	28.88	8.99	9.84	179.8
168	0.01	0	0	32.69	0.01	0	15.99	0	15.99	15.99	32.23	15.78	0.37	315.6	0.05	0	0	32.11	1	0	15.99	0	15.99	15.98	32.61	15.92	0.12	318.4
169	23.95	0.06	0	0	34.92	0.06	9.99	0	9.99	9.99	10	9.97	9.72	199.4	24.03	0.02	0	0	34.96	0.02	10	0	10	10	10.88	10	10.11	200
170	0.04	0	0	34.04	0	0	15.95	0	15.95	15.01	34	14.97	5.87	299.4	0	0	0	33	1	0	16	0	16	15.94	34	15.01	5.46	300.2
171	12.83	0.46	0.02	2.53	14.09	0.34	8.97	0.03	8.69	8.63	3.5	8.54	35.93	170.8	12.85	0.24	0.16	2.58	13.88	0.13	8.54	0.14	8.16	8.31	3.23	8.18	34.17	163.6
172	0.01	1.47	0	0.01	24	8.9	0	0	0	7	24	7	23.26	140	0	1.56	0	0	24	9.54	0	0	0	7	24	7	24	140
173	10.28	0	0	0.06	16.73	0	11.97	0	11.97	11.75	6.34	11.47	19.27	229.4	9.4	0.01	0.01	0.09	16.83	0.01	12.01	0.01	12.01	11.82	7.37	11.52	19.58	230.4
174	0.01	0	0	32.51	0	0	15.94	0	15.94	15.53	32.48	15.23	5.72	304.6	0.03	0	0.01	31.59	1	0	15.89	0.01	15.89	15.82	32.36	15.31	5.71	306.2
175	0	2.62	0	0	23.99	9.6	0	0	0	6.98	23.89	6.98	23.4	139.6	0	2.68	0	0	23.97	9.81	0	0	0	6.99	23.94	6.99	24.55	139.8
176	0.38	0.17	0	0.2	10.92	0.17	12.7	0	12.66	11.89	10.72	11.85	18.67	237	0.32	0.15	0	0.07	11.21	0.15	12.75	0	12.73	11.99	10.93	11.97	19.24	239.4
