# Supplementary material
Source: ML conference proceedings conference paper supplement (https://openreview.net/forum?id=ebe9uW2yQA)
Supplement: supplementary_material [file event_count_br.xlsx]

## Sheet: Events
	1-put_onion_on_X_by_agent0	1-put_tomato_on_X_by_agent0	1-put_dish_on_X_by_agent0	1-put_soup_on_X_by_agent0	1-pickup_onion_from_X_by_agent0	1-pickup_onion_from_O_by_agent0	1-pickup_tomato_from_X_by_agent0	1-pickup_tomato_from_T_by_agent0	1-pickup_dish_from_X_by_agent0	1-pickup_dish_from_D_by_agent0	1-pickup_soup_from_X_by_agent0	1-USEFUL_DISH_PICKUP_by_agent0	1-SOUP_PICKUP_by_agent0	1-PLACEMENT_IN_POT_by_agent0	1-viable_placement_by_agent0	1-optimal_placement_by_agent0	1-catastrophic_placement_by_agent0	1-useless_placement_by_agent0	1-potting_onion_by_agent0	1-potting_tomato_by_agent0	1-cook_by_agent0	1-delivery_by_agent0	1-deliver_size_two_order_by_agent0	1-deliver_size_three_order_by_agent0	1-deliver_useless_order_by_agent0	1-STAY_by_agent0	1-MOVEMENT_by_agent0	1-IDLE_MOVEMENT_by_agent0	1-IDLE_INTERACT_by_agent0	0-put_onion_on_X_by_agent1	0-put_tomato_on_X_by_agent1	0-put_dish_on_X_by_agent1	0-put_soup_on_X_by_agent1	0-pickup_onion_from_X_by_agent1	0-pickup_onion_from_O_by_agent1	0-pickup_tomato_from_X_by_agent1	0-pickup_tomato_from_T_by_agent1	0-pickup_dish_from_X_by_agent1	0-pickup_dish_from_D_by_agent1	0-pickup_soup_from_X_by_agent1	0-USEFUL_DISH_PICKUP_by_agent1	0-SOUP_PICKUP_by_agent1	0-PLACEMENT_IN_POT_by_agent1	0-viable_placement_by_agent1	0-optimal_placement_by_agent1	0-catastrophic_placement_by_agent1	0-useless_placement_by_agent1	0-potting_onion_by_agent1	0-potting_tomato_by_agent1
1	0.14	0	0	0	0.14	16.81	0	1.19	0	0	0	0	0	17	17	17	0	0	15.81	1.19	0	0	0	0	0	44.68	320.04	2.16	0	0.12	0	0	0	0.12	16.92	0	1.08	0	0	0	0	0	17.99	17.99	17.99	0	0	16.91	1.08
2	0	0	0.98	0.01	0	11	0	1	0.98	11.34	0.01	11.34	11	12	12	12	0	0	11	1	0	11	1	10	0	35.3	305.01	0.71	0	0.01	0	0.96	0	0	12.01	0	0	0.96	11.33	0	11.33	11	12	12	12	0	0	12	0
3	0.02	0	0	0	0.02	28.96	0	1.04	0	0	0	0	0	30	30	30	0	0	28.96	1.04	10	0	0	0	0	21.75	306.47	0.03	0	0	0	0	0	0	28.97	0	1.03	0	0	0	0	0	30	30	30	0	0	28.97	1.03
4	13.12	0.01	0	0	12.98	24.88	0.01	0.03	0	0	0	0	0	24.55	24.55	24.55	0	0	24.52	0.03	0.99	0	0	0	0	41.84	281.59	0.61	0	12.99	0	0	0	12.91	23.98	0.01	1	0	0	0	0	0	24.83	24.83	24.83	0	0	23.82	1.01
5	0.02	0	2.32	0	0.01	11.99	0	0	2.32	10.98	0	10.98	10.98	11.02	11.02	11.02	0	0	11.02	0	0	10.98	0.02	10.96	0	37.02	302.32	1.68	0	0	0.03	2.13	0	0	11.99	0.01	0.03	2.11	11.17	0	11.14	11	11.99	11.99	11.99	0	0	11.98	0.01
6	0.01	0	0.39	0	0.01	12	0	0	0.39	11	0	11	11	11	11	11	0	0	11	0	0	11	0	11	0	46.16	294.11	2.99	0	0.03	0	0.46	0	0.02	12.01	0	0	0.4	11.39	0	11.39	11.01	11.99	11.99	11.99	0	0	11.99	0
7	0	0	0	0	0	23	0	0	0	0	0	0	0	23	23	23	0	0	23	0	12	0	0	0	0	48.26	287.61	0.54	0	0	0	0	0	0	23.94	0	0.02	0	0	0	0	0	23	23	23	0	0	22.98	0.02
8	0	0	0	0	22	20	0	0	0	0	0	0	0	42	42	42	0	0	42	0	21	0	0	0	0	11.32	277.47	0.35	0	0.05	0	0	0	21.02	20.23	0	0.75	0	0	0	0	0	41.24	41.24	41.24	0	0	40.49	0.75
9	0.06	0	0	0	21.07	20.94	0.01	0.01	0	0	0	0	0	41.8	41.8	41.8	0	0	41.79	0.01	20.67	0	0	0	0	4.37	289.44	19.65	0	0.04	0	0	0	21.15	20.67	0	0.99	0	0	0	0	0	41.97	41.97	41.97	0	0	40.98	0.99
10	0.96	0	0	0	21.07	21.8	0	0	0	0	0	0	0	41	41	41	0	0	41	0	19.94	0	0	0	0	14.78	280.37	0.03	0	1	0	0	0	20.97	21.95	0	0	0	0	0	0	0	40.94	40.94	40.94	0	0	40.94	0
11	11.33	0	0	0	25.33	22.86	0	0	0	0	0	0	0	36	36	36	0	0	36	0	12	0	0	0	0	24.07	267.63	0.97	0	11.34	0	0	0	24.33	23.91	0	0	0	0	0	0	0	35.97	35.97	35.97	0	0	35.97	0
12	0.07	0.02	0	0	16.04	16.69	0.03	0.01	0	0	0	0	0	32.03	32.03	32.03	0	0	32.01	0.02	15.8	0	0	0	0	35.35	274.19	1.04	0	0.11	0	0	0	16.34	16.8	0	0	0	0	0	0	0	32.58	32.58	32.58	0	0	32.58	0
13	6.68	0	0	0.01	6.68	18	0	0	0	0	16.3	0	0	17.83	17.83	17.83	0	0	17.83	0	0.69	15.99	15.99	0	0	59.61	257.92	0.19	0	6.7	0.03	0	0.18	6.7	17.93	0.02	0.01	0	0	16.44	0	0	17.84	17.84	17.84	0	0	17.84	0
14	0	0	0	0.04	0	23.98	0	0	0	0	0.04	0	0	23.97	23.97	23.97	0	0	23.97	0	15.98	0	0	0	0	32	282.9	0.31	0	0.01	0	0	0	0.01	24.01	0	0	0	0	0	0	0	24	24	24	0	0	24	0
15	0	0	0.01	0	0	11	0	0	0.01	11	0	11	10.93	11	11	11	0	0	11	0	0	10	0	10	0	38.67	307.32	1.37	0	0	0	0.03	0	0	12	0	0	0.03	11	0	11	11	12	12	12	0	0	12	0
16	0.04	0	0	0	0.03	21.98	0	0.01	0	0	0	0	0	21.94	21.94	21.94	0	0	21.94	0	11	0	0	0	0	52.56	290.18	0.19	0	0.01	0	0	0	0.01	22.01	0	0	0	0	0	0	0	21.99	21.99	21.99	0	0	21.99	0
17	0.03	0	0	0	0.04	21.94	0	0	0	0	0	0	0	21.95	21.95	21.95	0	0	21.95	0	10.97	0	0	0	0	48.34	290.46	0.3	0	0.02	0	0	0	0.02	22	0	0	0	0	0	0	0	22	22	22	0	0	22	0
18	0.07	0	0	0.12	0.06	29.79	0	0	0	0	0.12	0	0	29.23	29.23	29.23	0	0	29.23	0	9.78	0	0	0	0	29.34	299.06	0.26	0	0.07	0	0	0.09	0.07	28.56	0	0.01	0	0	0.09	0	0	28.14	28.14	28.14	0	0	28.13	0.01
19	0	0	0.04	0	0	11	0	0	0.04	11	0	11	10.67	11	11	11	0	0	11	0	0	10	0	10	0	46.22	300	1.85	0	0.04	0	0.05	0	0.03	12.01	0	0	0.05	11	0	11	11	12	12	12	0	0	12	0
20	0	0	0.01	0	0	11.02	0	0	0.01	11	0	11	10.99	11	11	11	0	0	11	0	0.02	10.02	0.02	10	0	42.54	301.56	2.61	0	0	0	0	0	0	12	0	0	0	11.01	0	11.01	11	12	12	12	0	0	12	0
21	1.39	0	0	0.18	1.37	27.08	0	0	0	0	0.18	0	0	26.54	26.54	26.54	0	0	26.54	0	8.66	0	0	0	0	28.84	301.65	1.05	0	0.66	0.02	0	0.04	0.72	28.28	0.04	0.01	0	0	0.04	0	0	27.72	27.72	27.72	0	0	27.69	0.03
22	0.42	0.11	0.04	1.54	0.42	30.86	0.13	0	0.03	0.01	1.54	0.01	0	30.26	30.26	30.26	0	0	30.24	0.02	7.73	0	0	0	0	18.67	306.13	0.82	0	0.07	0	0.08	0	0.07	33.44	0	0	0.07	0.01	0.01	0.01	0	32.87	32.87	32.87	0	0	32.87	0
23	0	0	0.18	0	0	11.01	0	0	0.18	10.98	0	10.98	10.93	10.98	10.98	10.98	0	0	10.98	0	0	10.01	0.01	10	0	37.34	308.26	12.41	0	0	0	0.22	0	0	12	0	0	0.22	11	0	11	11	12	12	12	0	0	12	0
24	0	0	0.06	0	0	11	0	0	0.06	11	0	11	10.98	11	11	11	0	0	11	0	0	10	0	10	0	50.7	295.1	3.7	0	0	0	0.03	0	0	11.97	0	0	0.03	10.99	0	10.99	10.98	11.97	11.97	11.97	0	0	11.97	0
25	0	0	0	0	0	22.99	0	0	0	0	0	0	0	22.97	22.97	22.97	0	0	22.97	0	11.96	0	0	0	0	44.05	290.41	0.39	0	0.01	0	0	0	0	22.95	0	0	0	0	0	0	0	22.74	22.74	22.74	0	0	22.74	0
26	0.13	0	0.02	0	0.09	21.98	0	0	0.02	0	0	0	0	21.03	21.03	21.03	0	0	21.03	0	10.99	0	0	0	0	34.38	305.71	1.83	0	0.2	0	0	0	0.2	22.01	0	0	0	0	0	0	0	21.97	21.97	21.97	0	0	21.97	0
27	0	0	0	0	0	30.96	0	0	0	0	0	0	0	30	30	30	0	0	30	0	19.99	0	0	0	0	28.1	288.02	0.41	0	0.03	0	0	0	0.03	30	0	0.99	0	0	0	0	0	30.93	30.93	30.93	0	0	29.94	0.99
28	0	0	0.06	0	0	11.99	0	0	0.05	11.01	0	11	11	11.04	11.04	11.04	0	0	11.04	0	0.01	11	0.02	10.98	0	42.09	300.14	2.25	0	0	0	0.05	0	0	12	0	0	0.03	11.78	0	11.78	11	12	12	12	0	0	12	0
29	0.17	0	0	0	0.12	29.33	0	0	0	0	0	0	0	28.89	28.89	28.89	0	0	28.89	0	10.01	0	0	0	0	25.72	302.91	0.6	0	0.85	0	0	0	0.61	29.36	0	0.01	0	0	0	0	0	28.67	28.67	28.67	0	0	28.67	0
30	0	0	0	0	0	31	0	0	0	0	0	0	0	30	30	30	0	0	30	0	10	0	0	0	0	28.3	294.7	0.04	0	0	0	0	0	0	31	0	0	0	0	0	0	0	30.89	30.89	30.89	0	0	30.89	0
31	0	0	0	0	0	31	0	0	0	0	0	0	0	30	30	30	0	0	30	0	10	0	0	0	0	16.88	310.34	0.06	0	0	0	0	0	0	31	0	0	0	0	0	0	0	30.99	30.99	30.99	0	0	30.99	0
32	0.03	0	0	0	0.03	16.84	0	1.16	0	0	0	0	0	17.83	17.83	17.83	0	0	16.67	1.16	0	0	0	0	0	62.44	296.88	1.39	0	0.01	0	0	0	0	16.98	0	1.01	0	0	0	0	0	17.67	17.67	17.67	0	0	16.66	1.01
33	0.28	0.01	0.01	0	0.28	23	0.01	0.03	0.01	0	0	0	0	22.99	22.99	22.99	0	0	22.96	0.03	12	0	0	0	0	43.71	288.45	1.81	0	0.33	0	0	0	0.33	22.95	0	1.03	0	0	0	0	0	22.99	22.99	22.99	0	0	21.97	1.02
34	0	0	0	0	0	23.76	0	0.07	0	0	0	0	0	23	23	23	0	0	22.93	0.07	11.99	0	0	0	0	55.16	282.4	1.92	0	0.04	0	0	0	0.03	23	0	1	0	0	0	0	0	23	23	23	0	0	22	1
35	0	0	0	0	0	22.97	0	0.03	0	0	0	0	0	23	23	23	0	0	22.97	0.03	12	0	0	0	0	44.63	283.36	0.23	0	0	0	0	0	0	22.94	0	1.05	0	0	0	0	0	23	23	23	0	0	21.95	1.05
36	0.02	0	0	0	0.01	12.01	0	0	0	11.09	0	11.09	11	11.99	11.99	11.99	0	0	11.99	0	0.99	11	0.99	10.01	0	43.67	298.19	0.93	0	0	0.02	0	0	0	12	0.01	0.01	0	11.11	0	11.11	11	12	12	12	0	0	12	0
37	0.01	0	0.04	0	0.01	11.89	0	0	0.04	10.99	0	10.99	10.99	11	11	11	0	0	11	0	0.01	10.98	0	10.98	0	55.65	282.2	0.86	0	0.02	0	0	0	0.01	12.01	0	0	0	11.1	0	11.1	11.03	12	12	12	0	0	12	0
38	0.07	0	0.02	0	0.08	11.92	0	0.03	0.02	11.09	0	11.09	11	11.91	11.91	11.91	0	0	11.88	0.03	0	10.98	0.96	10.02	0	52.64	289.65	1.93	0	0.04	0.01	0	0.01	0.03	11.96	0	0.01	0	11.04	0	11.04	10.96	11.94	11.94	11.94	0	0	11.94	0
39	0.03	0	0	0	0.03	14.4	0	3.6	0	0	0	0	0	17.91	17.91	17.91	0	0	14.31	3.6	0	0	0	0	0	51.03	312.71	0.93	0	0.04	0	0	0	0.03	14.69	0	3.32	0	0	0	0	0	17.85	17.85	17.85	0	0	14.55	3.3
40	0.4	0.28	0.17	0	0.4	16.71	0.28	1.03	0.15	0.02	0	0	0	17.24	17.24	17.24	0	0	16.22	1.02	0	0	0	0	0	67.95	295.36	2.34	0	2.87	0	0.01	0	2.85	16.84	0	0.1	0	0.01	0	0	0	16.25	16.25	16.25	0	0	16.15	0.1
41	0.01	0	0	0	0	29.62	0	1.03	0	0	0	0	0	29.97	29.97	29.97	0	0	28.94	1.03	9.86	0	0	0	0	31.93	293.13	0.08	0	0.05	0.01	0	0	0.05	29.54	0.01	1.01	0	0	0	0	0	30.05	30.05	30.05	0	0	29.04	1.01
42	0.04	0	0	0	19.75	21.92	0	0	0	0	0	0	0	40.84	40.84	40.84	0	0	40.84	0	19.94	0	0	0	0	21.74	264.44	0.02	0	0.01	0	0	0	19.97	21.98	0	0	0	0	0	0	0	41.86	41.86	41.86	0	0	41.86	0
43	0	0	0	0	0	16.95	0	1.05	0	0	0	0	0	17.82	17.82	17.82	0	0	16.77	1.05	0	0	0	0	0	58.2	304.91	3.53	0	0	0	0	0	0	17.94	0	0.06	0	0	0	0	0	17.85	17.85	17.85	0	0	17.79	0.06
44	0.04	0	0	0	0.03	29.72	0	1.03	0	0	0	0	0	30.12	30.12	30.12	0	0	29.09	1.03	9.44	0	0	0	0	22.79	301.83	4.45	0	0.02	0.06	0	0	0.03	29.76	0.06	1.02	0	0	0	0	0	30.43	30.43	30.43	0	0	29.42	1.01
45	0	0	0.14	0	0	11.99	0	0	0.14	11	0	11	11	11.56	11.56	11.56	0	0	11.56	0	0	10.99	0	10.99	0	48.78	293.93	0.94	0	0.01	0	0.06	0	0	12	0	0	0.06	11.72	0	11.72	11.01	11.99	11.99	11.99	0	0	11.99	0
46	0.03	0	0.03	0	0.02	12	0	0	0.03	11.07	0	11.07	10.99	11.98	11.98	11.98	0	0	11.98	0	0.01	10.99	0.99	10	0	40.56	302.22	3.54	0	0.06	0	0.01	0	0.05	12.01	0	0	0.01	11.14	0	11.14	10.99	11.98	11.98	11.98	0	0	11.98	0
47	0.16	0.02	0.22	1.3	0.16	10.91	0.01	0.01	0.21	14.91	1.17	14.79	14.78	10.9	10.9	10.9	0	0	10.9	0	5.97	14.33	5.82	8.5	0.01	24.98	295.81	2.4	0	0.17	0	0.22	1.46	0.16	10.96	0	0	0.22	14.89	1.33	14.89	14.8	10.91	10.91	10.91	0	0	10.91	0
48	0	0.01	0.48	0	0	11.99	0.01	0.01	0.56	10.87	0	10.87	10.95	11.57	11.57	11.57	0	0	11.56	0.01	0	10.95	0.03	10.92	0	36.11	306.41	0.7	0	0.01	0	0.73	0	0	12.02	0	0	0.67	11.71	0.01	11.64	10.98	12.01	12.01	12.01	0	0	12.01	0
49	0.34	0	0.01	0	0.33	20.99	0	0.01	0.02	6.9	0	6.9	6.45	20.97	20.97	20.97	0	0	20.96	0.01	6.99	6.07	0.03	6.04	0	21.99	303.01	0.14	0	0.65	0	0.08	0.01	0.64	20.63	0	0	0.08	6.3	0.01	6.3	5.96	20.56	20.56	20.56	0	0	20.56	0
50	0.02	0	0	0	0.02	23.08	0	0.08	0	0	0	0	0	22.96	22.96	22.96	0	0	22.88	0.08	11.95	0	0	0	0	47.52	291.32	1.12	0	0.12	0	0	0	0.1	22.23	0	1.07	0	0	0	0	0	22.86	22.86	22.86	0	0	21.79	1.07
51	0	0	0.05	0	0	10.96	0	11.99	0.05	0	0	0	0	22.93	22.93	22.93	0	0	10.96	11.97	11.94	0	0	0	0	35.27	298.68	1.16	0	0	0	0	0	0	11.92	0	11	0	0	0	0	0	22	22	22	0	0	11	11
52	0.01	0	0	0	0.01	23.02	0	0	0	0	0	0	0	23	23	23	0	0	23	0	12	0	0	0	0	46.18	292.73	0.95	0	0.01	0	0	0	0.01	23.21	0	0.01	0	0	0	0	0	22.98	22.98	22.98	0	0	22.97	0.01
53	0.37	0	0	0	0.37	24.97	0	0	0	0	0	0	0	24.6	24.6	24.6	0	0	24.6	0	1.02	0	0	0	0	48.43	298.98	1.18	0	0.33	0	0	0	0.33	24.98	0	0	0	0	0	0	0	24.91	24.91	24.91	0	0	24.91	0
54	0.51	0.15	0.04	0.06	0.48	20.65	0.16	0	0.03	10.05	0.04	10.02	9.86	20.31	20.31	20.31	0	0	20.31	0	9.52	9.8	9.79	0.01	0	11.54	306.37	0.67	0	0.31	0	0.01	0.1	0.26	20.77	0	0.01	0.01	10.27	0.08	10.27	10.05	20.6	20.6	20.6	0	0	20.59	0.01
55	0.02	0	0	0	0.02	17.98	0	0	0	8	0	8	8	17.6	17.6	17.6	0	0	17.6	0	8.98	8	8	0	0	38.05	286.27	1.18	0	0.04	0	0.01	0.01	0.04	17.97	0	0	0.01	8.98	0.01	8.96	8.98	17	17	17	0	0	17	0
56	0.81	0	0	0	0.84	17.04	0	0.02	0	0	0	0	0	16.72	16.72	16.72	0	0	16.71	0.01	0.02	0	0	0	0	69.44	295.1	0.76	0	0.77	0.04	0.01	0	0.65	17.14	0.04	0.03	0.01	0.01	0	0	0	16.66	16.66	16.66	0	0	16.64	0.02
57	0	0	0	0.01	0	21.99	0	0	0	10.74	0	10.74	10.62	21.98	21.98	21.98	0	0	21.98	0	10.76	9.86	9.86	0	0	1.01	312.74	0.08	0	0.03	0	0.01	0.01	0.03	23.05	0	0	0.01	9.87	0	9.87	9.86	22.87	22.87	22.87	0	0	22.87	0
58	0.46	0	0	0	0.35	30.99	0	0	0	0.01	0	0	0	30.79	30.79	30.79	0	0	30.79	0	10.87	0	0	0	0	17.75	301.25	0.14	0	0.72	0	0	0	0.57	30.94	0	0.99	0	0	0	0	0	31.63	31.63	31.63	0	0	30.64	0.99
59	0	0	0	0	0	30.99	0	0	0	0	0	0	0	30.99	30.99	30.99	0	0	30.99	0	10.99	0	0	0	0	23.21	295.42	0.14	0	0	0	0	0	0	31.69	0	0.02	0	0	0	0	0	31.68	31.68	31.68	0	0	31.66	0.02
60	0.01	0	0.11	0	0	23.01	0	0	0.11	7	0	7	7	22.9	22.9	22.9	0	0	22.9	0	7	7	0	7	0	22.91	302.51	0.93	0	0	0	0.04	0	0	22.78	0	0	0.04	6.94	0	6.94	6.94	22.73	22.73	22.73	0	0	22.73	0
61	0	0	0	0	0	10.97	0	12.02	0	0	0	0	0	22.94	22.94	22.94	0	0	10.97	11.97	11.86	0	0	0	0	47.63	290.31	1.47	0	0.06	0	0.02	0	0.05	11.93	0	11.03	0.01	0.01	0	0	0	21.98	21.98	21.98	0	0	10.96	11.02
62	0	0	0	0	0	23	0	0	0	0	0	0	0	22.96	22.96	22.96	0	0	22.96	0	11.91	0	0	0	0	37.71	299.59	2.65	0	0.01	0	0.1	0	0.02	22.8	0	0.01	0.08	0.02	0	0	0	21.9	21.9	21.9	0	0	21.89	0.01
63	0	0	0.72	0	0	10.97	0	0	0.72	10.96	0	10.96	10.86	10.97	10.97	10.97	0	0	10.97	0	0	9.97	0	9.97	0	30.85	313.4	0.58	0	0.08	0	0.47	0	0.1	11.76	0	0	0.46	10.8	0	10.8	10.78	11.77	11.77	11.77	0	0	11.77	0
64	0.01	0	0	0	0.01	31.86	0	0	0	0	0	0	0	31	31	31	0	0	31	0	10	0	0	0	0	15.75	303.58	0.04	0	0.01	0	0	0	0.01	31.97	0	0	0	0	0	0	0	31.12	31.12	31.12	0	0	31.12	0
65	0	0	0	0.02	0	28.93	0	0	0	7	0.01	6.99	6.99	27.98	27.98	27.98	0	0	27.98	0	7	6.96	6.96	0	0	0.24	314.87	0.2	0	0.02	0	0	0	0.02	28.96	0	0.02	0	7	0	7	7	27.98	27.98	27.98	0	0	27.96	0.02
66	0	0	0	0	0	29.99	0	0	0	0	0	0	0	29.96	29.96	29.96	0	0	29.96	0	19.85	0	0	0	0	16.68	299.65	0.2	0	0.02	0	0	0	0.02	30	0	0	0	0	0	0	0	29.86	29.86	29.86	0	0	29.86	0
67	0.01	0	0	0	0.01	28.95	0	1	0	0	0	0	0	29.91	29.91	29.91	0	0	28.91	1	9.97	0	0	0	0	20.21	305.85	0.08	0	0	0	0	0	0	29.02	0	1.01	0	0	0	0	0	30	30	30	0	0	29	1
68	11.28	0.01	0	0	25.27	21.95	0.01	0.01	0	0	0	0	0	35.93	35.93	35.93	0	0	35.92	0.01	11.97	0	0	0	0	17.74	274.6	0.7	0	11.37	0	0	0	24.36	23.28	0	0	0	0	0	0	0	35.96	35.96	35.96	0	0	35.96	0
69	0.01	0	0.05	0	0	11.98	0	0	0.05	11.09	0	11.09	10.99	11.93	11.93	11.93	0	0	11.93	0	0.94	10.99	0.95	10.04	0	57.38	281.52	3.18	0	0	0	0.05	0	0	12	0	0	0.05	11.05	0	11.05	11.02	12	12	12	0	0	12	0
70	0.41	0	0.01	0.04	0.32	28.92	0	0	0	0.01	0.05	0.01	0	28.59	28.59	28.59	0	0	28.59	0	9.23	0	0	0	0	23.73	306.59	0.97	0	0.17	0	0	0	0.13	29.94	0	0	0	0	0	0	0	29.45	29.45	29.45	0	0	29.45	0
71	0.01	0	0	0	0.01	17.99	0	0	0	0	0	0	0	17	17	17	0	0	17	0	0	0	0	0	0	81.41	283.15	2.47	0	0.01	0	0	0	0.01	18	0	0	0	0	0	0	0	17.44	17.44	17.44	0	0	17.44	0
72	0	0	0.02	0	0	12	0	0	0.02	11	0	11	11	11.7	11.7	11.7	0	0	11.7	0	0	11	0	11	0	34.98	307.66	1.9	0	0.01	0	0.02	0	0	12.01	0	0	0.02	11.08	0	11.08	11	12	12	12	0	0	12	0
[truncated: 9 more columns]
