# Supplementary material
Source: ML conference proceedings conference paper supplement (https://openreview.net/forum?id=ebe9uW2yQA)
Supplement: supplementary_material [file event_count_br.xlsx]

## Sheet: Events
	1-put_onion_on_X_by_agent0	1-put_tomato_on_X_by_agent0	1-put_dish_on_X_by_agent0	1-put_soup_on_X_by_agent0	1-pickup_onion_from_X_by_agent0	1-pickup_onion_from_O_by_agent0	1-pickup_tomato_from_X_by_agent0	1-pickup_tomato_from_T_by_agent0	1-pickup_dish_from_X_by_agent0	1-pickup_dish_from_D_by_agent0	1-pickup_soup_from_X_by_agent0	1-USEFUL_DISH_PICKUP_by_agent0	1-SOUP_PICKUP_by_agent0	1-PLACEMENT_IN_POT_by_agent0	1-viable_placement_by_agent0	1-optimal_placement_by_agent0	1-catastrophic_placement_by_agent0	1-useless_placement_by_agent0	1-potting_onion_by_agent0	1-potting_tomato_by_agent0	1-cook_by_agent0	1-delivery_by_agent0	1-deliver_size_two_order_by_agent0	1-deliver_size_three_order_by_agent0	1-deliver_useless_order_by_agent0	1-STAY_by_agent0	1-MOVEMENT_by_agent0	1-IDLE_MOVEMENT_by_agent0	1-IDLE_INTERACT_by_agent0	0-put_onion_on_X_by_agent1	0-put_tomato_on_X_by_agent1	0-put_dish_on_X_by_agent1	0-put_soup_on_X_by_agent1	0-pickup_onion_from_X_by_agent1	0-pickup_onion_from_O_by_agent1	0-pickup_tomato_from_X_by_agent1	0-pickup_tomato_from_T_by_agent1	0-pickup_dish_from_X_by_agent1	0-pickup_dish_from_D_by_agent1	0-pickup_soup_from_X_by_agent1	0-USEFUL_DISH_PICKUP_by_agent1	0-SOUP_PICKUP_by_agent1	0-PLACEMENT_IN_POT_by_agent1	0-viable_placement_by_agent1	0-optimal_placement_by_agent1	0-catastrophic_placement_by_agent1	0-useless_placement_by_agent1	0-potting_onion_by_agent1	0-potting_tomato_by_agent1
6	0	0	0	0	0	14	0	13	0	0	0	0	0	26	26	26	0	0	13	13	13	0	0	0	0	0.04	333.96	0	0	0	0	0	0	0	13.91	0	12.91	0	0	0	0	0	25.82	25.82	25.82	0	0	12.91	12.91
7	0.01	0	0.13	12.87	0.01	13.37	0	0	0.11	13.18	0	12.93	13.02	13.31	13.31	13.31	0	0	13.31	0	13.29	0	0	0	0	2.57	301.36	0.29	0	0.06	0	0.07	12.93	0.06	13.3	0	0	0.04	13.19	0	12.79	13	13.28	13.28	13.28	0	0	13.28	0
8	0.2	0	0.02	9.25	0.17	6.93	0	0	0.02	12.44	3.4	12.44	12.07	6.83	6.83	6.83	0	0	6.83	0	6.82	6.05	0.23	5.8	0.02	40.77	292.82	0.76	0	0.03	0	0	8.96	0.03	6.98	0	0	0	12.51	3.01	12.51	12.1	6.93	6.93	6.93	0	0	6.93	0
9	0.11	0	0	9.99	0.11	10.39	0	0	0	10	0	10	9.99	10	10	10	0	0	10	0	10	0	0	0	0	53.29	283.99	0.18	0	0.01	0	0	10.02	0.01	10.83	0	0	0	10	0.02	10	10	10	10	10	0	0	10	0
10	0.01	0	0.09	0.17	0.01	13.99	0	0	0.09	6.99	0.17	6.99	6.99	13.97	13.97	13.97	0	0	13.97	0	9.31	6.02	0.02	6	0	12.59	324.53	2.34	0	0.01	0	0.06	0.11	0.01	13.99	0	0	0.06	7	0.11	7	6.99	13.99	13.99	13.99	0	0	13.99	0
11	4.58	0.53	0.27	6.91	4.33	6.14	0.51	0.03	0.2	5.39	1.74	5.39	5.26	5.55	5.55	5.55	0	0	5.55	0	5.55	0.01	0	0.01	0	48.73	300.26	13.39	0	3.44	0.1	0.07	6.65	3.23	5.93	0.09	0.06	0.06	5.11	1.64	5.1	5.07	5.3	5.29	5.29	0.01	0	5.29	0.01
12	0.04	0	0.19	0.01	0.04	13.96	0	0	0.19	6.83	0.01	6.83	6.07	13.94	13.94	13.94	0	0	13.94	0	6.97	6.01	0.05	5.96	0	27.39	315.25	0.2	0	0.08	0	0.3	0.11	0.06	13.82	0	0	0.31	6.68	0.1	6.67	5.98	13.78	13.78	13.78	0	0	13.78	0
15	0.1	0	0.61	0	0.09	13.93	0	0	0.6	6.95	0	6.95	6.92	13.91	13.91	13.91	0	0	13.91	0	6.95	6.01	0.07	5.94	0	23.78	315.38	0.28	0	0.02	0	0.5	0	0.01	13.96	0	0	0.49	6.97	0	6.97	6.91	13.93	13.93	13.93	0	0	13.93	0
16	0.69	0	2.06	12.85	0.57	12.72	0	0	1.98	13.04	0	12.96	12.89	12.13	12.13	12.13	0	0	12.13	0	12.07	0	0	0	0	7.19	311.2	0.02	0	0.44	0	2.28	12.91	0.36	12.8	0	0	2.19	13.07	0.01	12.97	12.92	12.26	12.26	12.26	0	0	12.26	0
17	0.02	0	0	13	0.02	13.99	0	0	0	13	0	13	13	13	13	13	0	0	13	0	13	0	0	0	0	11.45	309.52	0.67	0	0.06	0	0	13	0.06	13.99	0	0	0	13	0	13	13	13	13	13	0	0	13	0
18	0.08	0.01	0	0.99	0.07	10.95	0	0.01	0	9.98	0.98	9.98	9.98	10.39	10.39	10.39	0	0	10.39	0	10.16	9.97	9.97	0	0	4.87	331.53	0.19	0	0.06	0	0	0.98	0.05	10.95	0	0	0	9.96	0.97	9.96	9.96	10.57	10.57	10.57	0	0	10.57	0
19	0	0	0.15	8	0	16.97	0	0	0.15	8	0	8	8	16	16	16	0	0	16	0	8	0	0	0	0	37.43	295.25	0.41	0	0	0	0.24	7.99	0	16.95	0	0	0.24	8	0	8	7.99	15.99	15.99	15.99	0	0	15.99	0
20	0.01	0	0.36	9.94	0.01	11	0	0	0.35	9.99	0	9.94	9.98	10.99	10.99	10.99	0	0	10.99	0	9.98	0	0	0	0	49.76	282.48	0.07	0	0	0	0.41	9.77	0	11	0	0	0.41	9.99	0	9.99	9.88	10.96	10.96	10.96	0	0	10.96	0
21	0	0	0	16	0	17	0	0	0	16	0	16	16	16.98	16.98	16.98	0	0	16.98	0	16	0	0	0	0	1.16	300.86	0.03	0	0	0	0	16	0	17	0	0	0	16	0	16	16	17	17	17	0	0	17	0
22	0.03	0	0.01	15.87	0.03	16.85	0	0	0.01	15.87	0.01	15.87	15.87	16.56	16.56	16.56	0	0	16.56	0	15.86	0	0	0	0	2.28	300.74	0.02	0	0.04	0	0	16.02	0.04	17	0	0	0	16	0.02	16	16	16.86	16.86	16.86	0	0	16.86	0
23	0	0	0	16	0	17.99	0	0	0	16	0	16	16	17	17	17	0	0	17	0	16	0	0	0	0	0.01	301	0	0	0.01	0	0	16	0	17.9	0	0	0	16	0	16	16	16.99	16.99	16.99	0	0	16.99	0
24	0	0	0.11	15.96	0	17.82	0	0	0.08	16.01	0	15.92	15.97	16.98	16.98	16.98	0	0	16.98	0	15.98	0	0	0	0	0.12	300.97	0.01	0	0	0	0.17	15.92	0	16.81	0	0	0.15	15.84	0.11	15.81	15.81	16.57	16.57	16.57	0	0	16.57	0
25	0	0	0	16	0	17	0	0	0	16	0	16	16	17	17	17	0	0	17	0	16	0	0	0	0	1.44	299.51	0	0	0	0	0	15.99	0	17	0	0	0	16	0	16	15.99	17	17	17	0	0	17	0
26	0.39	1.11	4.84	0.72	0.36	0.06	0.99	7.21	11.26	0.6	0.69	0.4	6.5	6.96	6.96	6.96	0	0	0.01	6.95	0.01	6.35	0.24	6.11	0	34.09	310.36	16.83	0	0.22	0.92	5.55	0.61	0.16	0.09	0.74	6.67	11.58	0.48	0.54	0.23	5.94	6.39	6.39	6.39	0	0	0.02	6.37
27	0	1.03	0	0.79	0.01	0	1.03	21.92	0	0	0.79	0	0	21.82	21.82	21.82	0	0	0.01	21.81	6.98	0	0	0	0	33.41	311.25	0.78	0	0	1.12	0	0.92	0	0	1.12	21.99	0	0	0.92	0	0	21.8	21.8	21.8	0	0	0	21.8
28	0	0.7	0	3.41	0	0	0.68	19.66	0	0	3.42	0	0	19.28	19.27	19.27	0.01	0	0	19.28	5.93	0	0	0	0	32.26	313.76	0.52	0	0	0.47	0	3.6	0	0	0.46	19.8	0	0	3.6	0	0	19.47	19.47	19.47	0	0	0	19.47
30	0	1.93	0	0.06	0	0	1.93	8.03	0	0.06	0	0.06	0.06	7.94	7.94	7.94	0	0	0	7.94	0.06	0	0	0	0	65.55	314.37	4.97	0	0	1.83	0	0.16	0	0	1.83	8.09	0	0.11	0.05	0.11	0.11	8.05	8.05	8.05	0	0	0	8.05
31	0	0	0.04	0	0	0	0	10.01	10.02	0	0	0	9.95	10	10	10	0	0	0	10	0	9.02	0	9.02	0	47.44	303.37	1.6	0	0	0	0.04	0	0	0	0	10.01	10.03	0	0	0	9.97	10.01	10.01	10.01	0	0	0	10.01
32	0	0.24	0	0	0	0	0.22	12.15	0	0	0	0	0	11.88	11.88	11.88	0	0	0	11.88	0	0	0	0	0	52.56	322.95	1	0	0	0.18	0	0	0	0	0.17	12.08	0	0	0	0	0	11.85	11.85	11.85	0	0	0	11.85
33	0	4.06	0.08	3.22	0	0	4.01	14.71	0.07	2.77	0.46	2.77	2.76	13.76	13.76	13.76	0	0	0	13.76	3.74	0	0	0	0	24.78	324.8	0.17	0	0	3.72	0.08	3.07	0	0	3.66	14.69	0.04	2.76	0.36	2.71	2.71	13.71	13.71	13.71	0	0	0	13.71
34	0	2.13	0	0	0	0	2.13	17.02	0	0	0	0	0	16.9	16.9	16.9	0	0	0	16.9	0	0	0	0	0	51.68	310.14	1.51	0	0	1.92	0	0	0	0	1.91	17.05	0	0	0	0	0	16.97	16.97	16.97	0	0	0	16.97
35	0	1.91	0.01	4.57	0	0	1.88	13.59	0.02	3.73	0.86	3.72	3.74	13.26	13.26	13.26	0	0	0	13.26	3.84	0	0	0	0	26.3	323.69	0.22	0	0	1.96	0	4.6	0	0	1.94	13.6	0.01	3.75	0.86	3.75	3.76	13.36	13.36	13.36	0	0	0	13.36
36	0.04	0	0	0	0.02	20.01	0	0.01	0	0	0	0	0	20	20	20	0	0	19.99	0.01	0	0	0	0	0	31.43	328.49	0.32	0	0.02	0	0	0	0.01	19.93	0	0.02	0	0	0	0	0	19.7	19.7	19.7	0	0	19.68	0.02
37	0	0.03	0	0	0	0	0.03	18.95	17.65	0	0	0	17.34	18.84	18.84	18.84	0	0	0	18.84	0	16.97	16.97	0	0	2.71	307.48	0.14	0	0	0.05	0	0	0	0	0.05	18.99	17.64	0	0	0	17.28	18.88	18.88	18.88	0	0	0	18.88
38	0	0.74	0	7.05	0	0	0.74	14.79	0	5.82	1.23	5.82	5.82	13.82	13.82	13.82	0	0	0	13.82	6.83	0	0	0	0	28.25	314.09	0.31	0	0	1.03	0	6.9	0	0	1.03	14.68	0	5.78	1.13	5.78	5.78	13.74	13.74	13.74	0	0	0	13.74
39	0	6	0	0	0	0	5.98	8.02	0	0	0	0	0	7.01	7.01	7.01	0	0	0	7.01	0	0	0	0	0	77.93	295.06	0.63	0	0	6.26	0	0	0	0	6.25	8.01	0	0	0	0	0	7.02	7.02	7.02	0	0	0	7.02
40	0	0.67	0	0	0	0	0.67	15.1	0	0	0	0	0	14.99	14.99	14.99	0	0	0	14.99	0	0	0	0	0	45.07	321.82	2.32	0	0	0.92	0	0	0	0	0.89	15.13	0	0	0	0	0	14.97	14.97	14.97	0	0	0	14.97
41	0	1.32	0	0	0	0	1.32	13	0	0	0	0	0	13	13	13	0	0	0	13	0	0	0	0	0	71.15	300.2	2.11	0	0	1.13	0	0	0	0	1.12	13.01	0	0	0	0	0	13	13	13	0	0	0	13
42	0	0.02	0.05	0	0	0	0.02	10	0.04	9.99	0	9.99	9.98	10	10	10	0	0	0	10	0.01	9.68	0	9.68	0	37.09	307.72	9.53	0	0	0.02	0.03	0	0	0	0.02	9.99	0.03	9.98	0	9.98	9.98	9.98	9.98	9.98	0	0	0	9.98
43	0	2.82	0	0	0	0	2.82	13	0	0	0	0	0	12.99	12.99	12.99	0	0	0	12.99	0	0	0	0	0	47.96	320.41	1.97	0	0	5.09	0	0	0	0	5.09	12.86	0	0	0	0	0	12.45	12.45	12.45	0	0	0	12.45
44	0	4.99	0	0	0	0	4.99	8	0	0	0	0	0	8	8	8	0	0	0	8	0	0	0	0	0	75.4	298.6	0.54	0	0	5.13	0	0	0	0	5.12	8.02	0	0	0	0	0	8	8	8	0	0	0	8
45	0.02	0	0	0	0.01	20.01	0	0	0	0	0	0	0	19	19	19	0	0	19	0	0	0	0	0	0	31.29	329.67	0.31	0	0.01	0	0	0	0.01	19.98	0	0.02	0	0	0	0	0	19.66	19.66	19.66	0	0	19.64	0.02
46	0.32	0	0.03	1.05	0.32	7.86	0	0	0.03	7	1.05	7	7	7	7	7	0	0	7	0	7	7	0	7	0	44.01	301.56	1.32	0	0.33	0	0.08	0.91	0.32	7.89	0	0	0.08	6.97	0.9	6.97	6.97	7.02	7.02	7.02	0	0	7.02	0
47	0	0.79	0.14	0.71	0	0.02	0.79	13.1	0.13	0.37	0.4	0.36	0.33	12.6	12.6	12.6	0	0	0	12.6	1.26	0	0	0	0	44.58	324.45	8.16	0	0.01	1.06	0.03	0.61	0	0.01	1.04	13.11	0.03	0.32	0.43	0.32	0.24	12.68	12.68	12.68	0	0	0	12.68
48	0	1.84	0.09	8.3	0	0	1.83	14.83	0.05	5.99	2.36	5.96	5.94	14.61	14.61	14.61	0	0	0	14.61	6.9	0	0	0	0	39.71	296.52	0.2	0	0	2.15	0.05	7.95	0.01	0	2.15	14.9	0.04	5.96	2	5.95	5.95	14.81	14.81	14.81	0	0	0.01	14.8
49	0.06	0	0.16	6.46	0.05	7.98	0	0	0.16	13.82	0.54	13.82	13.47	7.97	7.97	7.97	0	0	7.97	0	6.95	6.94	0.01	6.93	0	17.55	309.49	0.92	0	0.13	0	0.25	6.52	0.12	7.97	0	0	0.25	13.76	0.6	13.75	13.1	7.95	7.95	7.95	0	0	7.95	0
50	0	5.39	0	0.01	0	0	5.36	18.74	0	0	0.01	0	0	17.8	17.8	17.8	0	0	0	17.8	1.96	0	0	0	0	44.84	304.05	0.78	0	0	5.55	0	0.01	0	0	5.49	18.74	0	0	0.01	0	0	17.82	17.82	17.82	0	0	0	17.82
51	0	0.94	0	6.77	0	0	0.93	14.97	0	5.95	0.82	5.95	5.95	13.96	13.96	13.96	0	0	0	13.96	6.95	0	0	0	0	32.86	307.16	0.04	0	0	2.17	0	6.79	0	0	2.16	14.9	0	5.93	0.86	5.93	5.93	13.94	13.94	13.94	0	0	0	13.94
52	0.11	1.59	0	0	0.1	0.01	1.58	16.95	0	0	0	0	0	16.93	16.93	16.93	0	0	0	16.93	0	0	0	0	0	41.51	321.22	0.51	0	0	1.5	0	0	0	0	1.5	16.95	0	0	0	0	0	16.91	16.91	16.91	0	0	0	16.91
53	0	0.17	0	0	0	0	0.17	15.98	0	0	0	0	0	15.84	15.84	15.84	0	0	0	15.84	0.99	0	0	0	0	33.97	332.87	0.07	0	0	0.12	0	0.03	0	0	0.12	16	0	0.01	0.02	0.01	0.01	15.86	15.86	15.86	0	0	0	15.86
54	0	0.34	0	9.07	0	0	0.34	19.9	0	9.02	0.08	9.02	8.99	19.53	19.53	19.53	0	0	0	19.53	9.97	0	0	0	0	4.06	318.62	0	0	0	0.23	0	9.07	0	0	0.23	19.84	0	9.06	0.09	9.06	8.99	19.47	19.47	19.47	0	0	0	19.47
55	0.45	0.08	0.11	0.67	0.31	14.9	0.05	0.2	0.11	7	0.74	7	7	14.38	14.38	14.38	0	0	14.32	0.06	7.01	6.99	0	6.99	0	30.91	306.28	0.37	0	0.23	0.02	0.08	0.64	0.12	14.98	0.01	0.12	0.08	7	0.72	7	7	14.36	14.36	14.36	0	0	14.29	0.07
56	0	0	0	0	0	13	0	0	0	12	0	12	12	12.65	12.65	12.65	0	0	12.65	0	12	12	12	0	0	1.23	325.12	0.24	0	0	0	0	0.01	0	13	0	0	0	12	0	12	12	12.89	12.89	12.89	0	0	12.89	0
57	0	0.73	0	0	0	0	0.68	17.37	0	0	0	0	0	17	17	17	0	0	0	17	0	0	0	0	0	39.11	324.17	0.49	0	0	0.26	0	0	0	0	0.25	17.26	0	0	0	0	0	16.99	16.99	16.99	0	0	0	16.99
59	0.06	0	0	13	0.06	14	0	0	0	13.92	0	13.92	13	14	14	14	0	0	14	0	14	0	0	0	0	1.81	316.15	0.02	0	0.05	0	0	13.08	0.05	13.99	0	0	0	13.91	0.08	13.91	13	13.99	13.99	13.99	0	0	13.99	0
60	0	1.2	0.03	6.94	0	0	1.2	14.82	0.03	5.96	1.05	5.96	5.96	13.94	13.94	13.94	0	0	0	13.94	6.95	0.01	0	0	0.01	37.02	303.09	0.91	0	0	1.15	0.02	7.09	0	0	1.14	14.86	0.03	5.99	1.12	5.98	6	14.16	14.16	14.16	0	0	0	14.16
61	0.03	0	0	12.48	0.03	12.92	0	0	0	12.75	0	12.75	12.61	12.87	12.87	12.87	0	0	12.87	0	12.85	0	0	0	0	11.69	306.36	0.15	0	0.03	0	0	12.34	0.02	12.93	0	0	0	12.61	0	12.61	12.45	12.75	12.75	12.75	0	0	12.75	0
62	0	0.3	0	0	0	0	0.3	17	0	0	0	0	0	17	17	17	0	0	0	17	0	0	0	0	0	44.21	321.19	0.61	0	0	0.42	0	0	0	0	0.42	17	0	0	0	0	0	17	17	17	0	0	0	17
63	0	0.78	0.06	8.79	0	0	0.78	8.91	0.06	7.93	1.08	7.93	7.93	8.28	8.28	8.28	0	0	0	8.28	7.96	0	0	0	0	45.35	298.56	0.25	0	0	0.8	0.09	8.47	0	0	0.79	9.05	0.09	7.93	0.74	7.93	7.92	8.36	8.36	8.36	0	0	0	8.36
64	0	0.04	0	0	0	0	0.04	13	0	0	0	0	0	12.83	12.83	12.83	0	0	0	12.83	0	0	0	0	0	69.32	304.68	0.54	0	0	0.04	0	0	0	0	0.04	13	0	0	0	0	0	12.94	12.94	12.94	0	0	0	12.94
65	0	0.03	0	0	0	0	0.03	15.96	15	0	0	0	15	15	15	15	0	0	0	15	15	14.99	14.99	0	0	18.23	285.91	0.01	0	0	0	0.01	0	0	0	0	15.98	15.01	0	0	0	15	15	15	15	0	0	0	15
66	0	1.59	0	0	0	0	1.56	13.03	0	0	0	0	0	12.99	12.99	12.99	0	0	0	12.99	0	0	0	0	0	47.37	323.46	3.55	0	0	1.6	0	0	0	0	1.59	13.01	0	0	0	0	0	12.96	12.96	12.96	0	0	0	12.96
67	0.22	0.03	0.03	14.48	0.18	15.09	0.01	0.03	0.03	14.5	0.05	14.5	14.47	14.51	14.51	14.51	0	0	14.51	0	13.53	0	0	0	0	2.41	308.99	1	0	0.25	0.01	0.04	14.54	0.21	15.25	0	0.01	0.03	14.61	0.05	14.53	14.53	14.6	14.6	14.6	0	0	14.6	0
68	0	4.78	0	0	0	0	4.77	13.01	0	0	0	0	0	13	13	13	0	0	0	13	0	0	0	0	0	68.95	295.45	1.48	0	0	4.76	0	0	0	0	4.76	13	0	0	0	0	0	13	13	13	0	0	0	13
69	0	3.82	0	0	0	0	3.82	12.84	0	0	0	0	0	12.03	12.03	12.03	0	0	0	12.03	0	0	0	0	0	62.26	305.14	0.21	0	0	3.47	0	0	0	0	3.47	12.85	0	0	0	0	0	11.98	11.98	11.98	0	0	0	11.98
70	0	0	0	16	0	17	0	0	0	16	0	16	16	16.95	16.95	16.95	0	0	16.95	0	16	0	0	0	0	0.98	301.07	0.66	0	0.01	0	0	16	0.01	17	0	0	0	16	0	16	16	16.93	16.93	16.93	0	0	16.93	0
71	0.06	0	0	15.99	0.06	16.97	0	0	0	16	0	15.99	15.99	16.57	16.57	16.57	0	0	16.57	0	15.99	0	0	0	0	2.44	299.73	0.02	0	0.02	0	0	16.01	0.02	17	0	0	0	16	0.01	16	16	16.96	16.96	16.96	0	0	16.96	0
[truncated: 9 more columns]
