# Supplementary material
Source: ML conference proceedings conference paper supplement (https://openreview.net/forum?id=ebe9uW2yQA)
Supplement: supplementary_material [file event_count_br.xlsx]

## Sheet: Events
	1-put_onion_on_X_by_agent0	1-put_dish_on_X_by_agent0	1-put_soup_on_X_by_agent0	1-pickup_onion_from_X_by_agent0	1-pickup_onion_from_O_by_agent0	1-pickup_dish_from_X_by_agent0	1-pickup_dish_from_D_by_agent0	1-pickup_soup_from_X_by_agent0	1-USEFUL_DISH_PICKUP_by_agent0	1-SOUP_PICKUP_by_agent0	1-PLACEMENT_IN_POT_by_agent0	1-delivery_by_agent0	1-STAY_by_agent0	1-sparse_r_by_agent0	0-put_onion_on_X_by_agent1	0-put_dish_on_X_by_agent1	0-put_soup_on_X_by_agent1	0-pickup_onion_from_X_by_agent1	0-pickup_onion_from_O_by_agent1	0-pickup_dish_from_X_by_agent1	0-pickup_dish_from_D_by_agent1	0-pickup_soup_from_X_by_agent1	0-USEFUL_DISH_PICKUP_by_agent1	0-SOUP_PICKUP_by_agent1	0-PLACEMENT_IN_POT_by_agent1	0-delivery_by_agent1	0-STAY_by_agent1	0-sparse_r_by_agent1
1	0.025	0.425	0	16.275	0	5.4	0	0	0	4.9	15.8	4.875	17.05	97.5	14.675	4.775	0	0.925	14.075	0.575	4.25	0	3.875	0	0	0	24.6	0
2	0.675	2.65	0	5.075	0	3.625	0	0	0	0.925	4.3	0.9	35.425	18	14.75	5.175	0	0.55	14.4	0.725	4.5	0	4.225	0	0	0	33.3	0
3	6.9	0	0	13.46	0	0	0	0	0	0	6	0	50.87	0	35.28	18.54	0	0.25	35.47	7.58	11	0	11	0	0	0	67.83	0
4	5.2	0	0	12.2	0	0	0	0	0	0	6	0	96.53	0	33.69	11.39	0	0	33.97	0.39	11	0	11	0	0	0	54.69	0
5	0	9.65	0	0	0	10.62	0	0	0	0	0	0	59.95	0	35.06	11.03	0	0.14	34.93	0.28	10.96	0	10.96	0	0	0	106.72	0
6	5.99	0	0	12.32	0	0	0	0	0	0	6	0	63.67	0	35	11.63	0	0.02	34.99	0.66	11	0	10.89	0	0	0	68.59	0
7	2.64	0.21	0.03	9.13	0	0.22	0	0.02	0	0.01	6.01	0	110.16	0	42.13	13.5	0	9.65	32.63	3.26	10.77	0	10.61	0	0	0	34.33	0
8	1.65	0	0	7.73	0	0	0	0	0	0	6	0	72.04	0	34.66	11.77	0	0.89	34.06	0.77	11	0	11	0	0	0	57.28	0
9	7.12	0	0	14.12	0	0	0	0	0	0	6	0	72.22	0	54.79	16.06	0	4.15	51.45	0.16	15.91	0	15.87	0	0	0	19.42	0
10	0	8.06	0	0	0	9.06	0	0	0	0	0	0	113.38	0	33.54	11.87	0	0	33.76	0.93	10.94	0	10.94	0	0	0	70.09	0
11	8.54	0	0	15.54	0	0	0	0	0	0	6	0	77.61	0	34.79	13.55	0	0.33	34.73	2.83	10.8	0	10.69	0	0	0	46.53	0
12	0	0.14	0.01	33.01	0	11.13	0	0.01	0	10.99	33.01	10.93	52.44	218.6	35.06	12.43	0	0.01	35.06	1.44	11.01	0	10.98	0	0	0	43.12	0
13	0	7.06	0	0	0	7.98	0	0	0	0	0	0	98.88	0	37.56	12.11	0	3.84	34.04	1.11	11	0	10.99	0	0	0	50.2	0
14	0	0.14	0	33	0	11.13	0	0	0	10.99	33	10.69	41	213.8	33.91	11.08	0	0.11	34.04	0.08	11	0	11	0	0	0	46	0
15	0	3.47	0	0	0	4.45	0	0	0	0	0	0	70.14	0	34.83	11.11	0	0.06	34.97	0.19	10.92	0	10.89	0	0	0	54.89	0
16	0	4.94	0	0	0	5.94	0	0	0	0	0	0	65.17	0	35.51	11.45	0	0.49	35.27	0.5	11	0	10.99	0	0	0	48.34	0
17	0.58	1.11	0.15	31.77	0	11.37	0	0.12	0	10.18	31.15	9.9	45.95	198	14.01	5.31	0	0.35	14.37	1	4.33	0	4.33	0	0	0	34.41	0
18	0	0.03	0	32.92	0	10.01	0	0	0	9.98	32.88	9.98	49.58	199.6	34	11.58	0	0	34.01	0.58	11	0	11	0	0	0	49.51	0
19	1.22	0.01	0	33.43	0	9.88	0	0	0	9.86	32	9.82	54.48	196.4	33.13	11.09	0	0.11	33.35	0.09	11	0	10.97	0	0	0	57.44	0
20	0	0.09	0	32.44	0	10.68	0	0	0	10.32	32.41	9.9	38.52	198	33.9	11.08	0	0.01	33.98	0.08	11	0	10.99	0	0	0	45.88	0
21	2.43	0	0	9.4	0	0	0	0	0	0	6	0	75.24	0	33.72	16.28	0	0	33.98	5.28	11	0	10.99	0	0	0	43.78	0
22	0	0.06	0	33	0	11.01	0	0	0	10	33	10	27.78	200	33.76	13.11	0	0.05	33.95	2.11	11	0	10.99	0	0	0	35.44	0
23	0.01	0.78	0.01	48.01	0	16.78	0	0.01	0	15.92	48	15.64	13.21	312.8	47.55	14.08	0	0.02	47.55	0.15	14.26	0	14.13	0	0	0	43.23	0
24	0.01	0.86	0.02	32.74	0	11.68	0	0.01	0	10.6	32.73	10.28	44.98	205.6	34.91	12.11	0	0.17	34.77	1.21	10.91	0	10.88	0	0	0	69.02	0
25	0	3.52	0	0	0	4.51	0	0	0	0	0	0	81.09	0	33.65	11.11	0	0.02	33.97	0.11	11	0	10.99	0	0	0	58.42	0
26	0.07	0.1	0	47.98	0	15.09	0	0	0	14.54	47.88	14.3	7.67	286	28.83	8.93	0	1.28	27.87	0.46	8.56	0	8.3	0	0	0	37.99	0
27	0.13	0.25	0	33.13	0	11.21	0	0	0	10.88	33	10.69	48	213.8	34.12	11.34	0	0.05	34.66	0.34	11	0	11	0	0	0	62.65	0
28	15.69	0	0	15.76	0	0	0	0	0	0	0	0	93.03	0	39.73	11.21	0	4.72	36	0.2	11.01	0	10.92	0	0	0	65.38	0
29	0	4.93	0	0	0	5.87	0	0	0	0	0	0	112.98	0	47.97	15.89	0	0.02	47.99	0.9	14.99	0	14.73	0	0	0	32.41	0
30	0	0.14	0	33.01	0	11.13	0	0	0	10.99	33	10.86	42.67	217.2	33.91	11.28	0	0.04	33.99	0.28	11	0	10.99	0	0	0	48.74	0
