# Supplementary material
Source: ML conference proceedings conference paper supplement (https://openreview.net/forum?id=ebe9uW2yQA)
Supplement: supplementary_material [file event_count_br.xlsx]

## Sheet: Events
	1-put_onion_on_X_by_agent0	1-put_dish_on_X_by_agent0	1-put_soup_on_X_by_agent0	1-pickup_onion_from_X_by_agent0	1-pickup_onion_from_O_by_agent0	1-pickup_dish_from_X_by_agent0	1-pickup_dish_from_D_by_agent0	1-pickup_soup_from_X_by_agent0	1-USEFUL_DISH_PICKUP_by_agent0	1-SOUP_PICKUP_by_agent0	1-PLACEMENT_IN_POT_by_agent0	1-delivery_by_agent0	1-STAY_by_agent0	1-sparse_r_by_agent0	0-put_onion_on_X_by_agent1	0-put_dish_on_X_by_agent1	0-put_soup_on_X_by_agent1	0-pickup_onion_from_X_by_agent1	0-pickup_onion_from_O_by_agent1	0-pickup_dish_from_X_by_agent1	0-pickup_dish_from_D_by_agent1	0-pickup_soup_from_X_by_agent1	0-USEFUL_DISH_PICKUP_by_agent1	0-SOUP_PICKUP_by_agent1	0-PLACEMENT_IN_POT_by_agent1	0-delivery_by_agent1	0-STAY_by_agent1	0-sparse_r_by_agent1
1	0.01	0.27	0	0.01	17.98	0.27	5.01	0	5.01	5	17.01	5	14.53	100	0	0.22	0	0	17.88	0.22	5	0	5	5	17	5	15.02	100
2	0	0.23	0	29	1	0.23	9	0	9	9	30	9	34.11	180	0.01	0.18	0	30.01	0	0.18	9.94	0	9.94	9	30	9	36.6	180
3	2.28	1.15	0	2.28	18.01	6.97	0	0	0	5.28	17.97	5.14	25.14	102.8	2.25	1.06	0	2.25	17.98	6.64	0	0	0	5.12	17.91	5.06	23.45	101.2
4	0.34	0.04	0	31.18	1	0.02	9.88	0	9.85	9.02	31.8	8.96	8.25	179.2	0.28	0.04	0	32.28	0	0.04	9.99	0	9.99	9.28	31.98	9.02	9.49	180.4
5	5.97	6	5	5.97	18	5.97	6	0	6	5	17.99	0	34.53	0	5.99	6.01	5	5.98	18	5.05	6	0	6	5	17.99	0	34.57	0
6	0	0.32	0	29.01	1	0.32	10	0	10	9.97	30.01	9	22.62	180	0	0.35	0	30.02	0	0.35	10	0	10	10	30.02	9	23.35	180
7	9.5	0.53	0	9.31	17.68	0.47	5.69	0	5.52	5.07	17.39	4.89	25.44	97.8	9.24	0.64	0	9.04	17.83	0.57	5.54	0	5.43	4.95	17.48	4.93	23.37	98.6
8	0	1	0	29.8	0	0.99	8.96	0	8.95	8.95	29.51	8.95	13.7	179	0.01	0.08	0	30.01	0	0.07	10	0	9.97	9	30	9	14.46	180
9	0.01	0.03	0	29.01	1	0.03	9	0	9	9	30	9	7.26	180	0.06	0.04	0.04	30	0	0.03	9.98	0.03	9.97	8.99	29.94	8.98	9.94	179.6
10	0.01	0.39	0	29.01	1	0.39	9	0	9	9	30	9	13.09	180	0	0.4	0	30	0	0.39	9.99	0	9.99	9	30	9	14.94	180
11	17	0.01	0.02	0	25	0.01	11	0.02	11	11	8	11	4.5	220	16	0	0.04	0.01	24	0	11	0.04	11	11	8.01	11	4.41	220
12	1.41	0.06	0.01	30.17	1	0.06	8.93	0.01	8.93	8.92	29.75	8.92	30.11	178.4	0.02	0.09	0.03	29.81	0	0.08	9.29	0.03	9.27	8.95	29.78	8.94	31.82	178.8
13	0.02	0.42	0	6.01	6.94	0.41	10.95	0	10.93	10.84	12.92	10	13.05	200	0.02	0.54	0	4.99	6.97	0.54	10.9	0	10.9	10.02	11.92	9.99	13.73	199.8
14	0.1	0.17	0.06	29.04	1	0.17	9	0.06	9	9	29.71	9	7.51	180	0.01	0.17	0.12	29.97	0	0.17	9.3	0.12	9.3	9	29.94	9	7.9	180
15	5.88	0.06	0	5.87	18	0.06	5.89	0	5.89	5	17.98	5	0.41	100	5.96	0	0	5.94	18	0	5.43	0	5.43	5	17.96	5	0.18	100
16	0.25	0	0	26.26	1	0	0.01	7.99	0.01	0.01	27	8	33.13	160	0.36	0	0	27.35	0	0	0.01	7.99	0.01	0.01	26.98	8	34.63	160
17	0	2.24	0	29	1	2.24	9	0	9	9	30	9	18.56	180	0.04	2.04	0	29.8	0	2.02	9.85	0	9.85	8.93	29.75	8.93	18.57	178.6
18	4.18	1.65	0.1	22.67	1.01	1.55	6.21	0.09	5.91	5.89	19.33	5.82	23.86	116.4	4.56	1.49	0.03	23.9	0.02	1.44	6.1	0.03	5.98	5.91	19.21	5.81	25.4	116.2
19	18	0.2	0	0	27	0.2	8	0	8	8	8	8	16.52	160	17.59	0.21	0	0.01	25.83	0.21	7.97	0	7.97	7.96	7.97	7.96	15.98	159.2
20	0	0.63	0	29	1	0.63	9	0	9	9	30	9	24.32	180	0.01	0.59	0	30.01	0	0.56	9.97	0	9.97	9	30	9	24.81	180
21	0.37	0.36	0.01	29.23	1	0.35	9.95	0.01	9.93	9.5	29.85	8.95	9.69	179	0.02	0.41	0.05	30.04	0	0.41	10	0.05	9.99	9.85	30.02	9	9.94	180
22	2.12	0.07	0	2.12	18	5.98	0	0	0	5.31	18	5.08	24.31	101.6	2	0.06	0	2	18	5.24	0	0	0	5.01	17.98	5	23.65	100
23	6.98	1.78	0	6.98	18	1.78	6	0	6	5.98	18	5.13	12.79	102.6	6	1.29	0	6	18	1.27	5.99	0	5.99	5	18	5	11.3	100
24	0	0.71	0	30	0	0.71	9	0	8.95	9	29.97	9	22.05	180	0.01	0.51	0	29.74	0	0.47	9.85	0	9.72	8.92	29.73	8.92	25.04	178.4
25	0.12	0.11	0	37.66	0	0.1	11.38	0	11.13	11	37.43	10.99	1.49	219.8	0.07	0	0	37.81	0	0	11.96	0	11.96	11.7	37.74	11.1	1.74	222
26	0.02	0.47	0.19	28.66	1	0.45	8.93	0.19	8.86	8.9	29.58	8.9	27.51	178	0.05	0.03	0	30.06	0	0.03	9.82	0	9.82	9	30	9	28.4	180
27	0.12	0.04	0	29.06	1	0.04	13.6	0	13.6	12.93	29.93	12.9	3.16	258	0.07	0	0	30.08	0	0	13.88	0	13.88	13.41	30	12.98	2.26	259.6
28	2.28	0.54	0	2.28	18	6.37	0	0	0	5.26	18	5.12	27.02	102.4	2.25	0.53	0	2.25	18	5.93	0	0	0	5.11	17.96	5.04	24.9	100.8
29	0	2.55	0	29	1	2.55	9	0	9	9	29.99	9	32.96	180	0	2.48	0	30	0	2.4	9.97	0	9.97	9	30	9	36.18	180
30	0	0	0.03	36.13	1	0	12	0.03	12	11.83	37.12	11.01	0.67	220.2	0.01	0	0.03	37.2	0	0	11.93	0.03	11.93	11.88	36.98	11.64	0.33	232.8
31	0.02	0.24	0	29	1.01	0.24	9	0	9	9	29.97	9	24.43	180	0	0.29	0	30	0	0.29	9.75	0	9.75	9	30	9	26.73	180
32	1.29	0.13	0.03	40.48	1.01	12.94	0	0.02	0	12.71	40.18	12.33	5.74	246.6	1.66	0.7	0.02	41.27	0	13.13	0	0.01	0	12.17	39.44	11.85	6.92	237
33	0	0.75	0	29.01	0.98	0.75	9	0	9	9	29.97	9	18.52	180	0	0.69	0	30	0	0.6	9.98	0	9.98	9	30	9	18.54	180
34	0	0	0.01	41.06	1	13	0	0.01	0	12.99	42	12.95	0.3	259	0.02	0	0	42.11	0	12.51	1.01	0	1	12.99	41.99	12.96	1.29	259.2
35	0	0	0	28.88	1	0	8.97	0	8.97	8.96	29.88	8.96	44.98	179.2	0.01	0	0	29.75	0	0	9.83	0	9.83	8.92	29.73	8.92	47.1	178.4
36	0.18	0.23	0.01	30.92	1	0.23	9.9	0.01	9.9	9.23	31.73	8.91	12.34	178.2	0.1	0.45	0	31.99	0	0.45	9.96	0	9.96	9.53	31.88	8.97	15.4	179.4
37	0	0.17	0	29	1	0.17	9	0	9	9	30	9	30.68	180	0.01	0.16	0	30.01	0	0.16	9.96	0	9.96	9	30	9	32.71	180
38	0.02	0	0	26.04	1	0	0	8	0	0	27.01	8	62.69	160	0	0	0	27	0	0	0	8	0	0	27	8	66.35	160
39	7.48	0.04	0	0.45	15.01	0.04	11.23	0	11.23	11	7.92	11	12.73	220	6.39	0.03	0.01	0.33	14.03	0.03	11	0.01	11	10.97	7.68	10.97	14.52	219.4
40	18.01	1.62	0	0.01	27	1.63	7.99	0	7.99	8	8	8	22.95	160	17.84	1.66	0	0	25.99	1.66	8	0	8	8	8	8	23.27	160
41	0	0.08	0	28.99	1	0.08	9	0	9	9	29.97	9	16.28	180	0.01	0.09	0	30.02	0	0.09	9.95	0	9.95	9	30	9	16.82	180
42	6.99	0.43	6	6.19	20.99	0.43	6	0	6	6	19.2	0	22.21	0	6.98	0.35	6	6.17	20.71	0.35	6	0	6	6	19.18	0	22.74	0
43	0	2.22	0	29	1	2.22	9	0	9	9	30	9	25.62	180	0	2.3	0	29.8	0	2.26	9.89	0	9.85	8.94	29.8	8.94	30.07	178.8
44	0	0.65	0	29	1	0.65	9	0	9	9	30	9	23.05	180	0.01	0.65	0	29.98	0	0.64	9.95	0	9.9	8.99	29.97	8.99	24.65	179.8
45	0.23	0.61	0	11.29	0	0.59	11.18	0	11.12	11	11.05	11	25.76	220	0.27	0.6	0	11.31	0	0.6	11.97	0	11.97	11	11.03	10.99	27.23	219.8
46	2.92	0.18	0	2.92	18.07	6.06	0	0	0	5.59	17.99	5.31	17.77	106.2	2.36	0.15	0	2.36	18	5.52	0	0	0	5.12	17.97	5.02	18.09	100.4
47	0	1.06	0	29	1	1.06	10	0	10	9.98	30	9	20.71	180	0	1.14	0	30.02	0	1.14	10	0	10	10	30.02	9	20.88	180
48	18.97	0.47	0	0	27.72	0.47	8	0	7.99	8	8	8	10.23	160	18	0.33	0	0	26	0.32	8.01	0	7.96	7.99	8	7.99	10.17	159.8
49	0.01	0.02	0	28.78	0.96	0.02	9.11	0	9.1	8.99	29.62	8.98	13.2	179.6	0	0.02	0	29.68	0	0.01	9.79	0	9.74	8.96	29.65	8.94	14.88	178.8
50	2	0.36	0	2	18	6.3	0	0	0	5.48	18	5.02	24.53	100.4	2.1	0.13	0	2.1	18	5.79	0	0	0	5.03	18	5	23.47	100
51	22.16	0.18	0	0.2	21.96	0.16	11.95	0	11.76	11.04	0	10.98	5.61	219.6	20.76	0.11	0.01	0.09	20.68	0.1	11.85	0	11.74	11.36	0	10.98	4.87	219.6
52	10.5	0.42	0	9.63	20.11	0.42	6	0	6	5.99	18.68	5.96	17.13	119.2	9.65	0.33	0	9.15	19.16	0.33	6	0	6	5.86	18.3	5.72	17.92	114.4
53	15.23	0.01	0	1.19	20.78	0.01	12	0	12	11.98	6	11.98	13.26	239.6	14.14	0.01	0	1.15	18.98	0.01	11.97	0	11.97	11.96	5.99	11.96	12.85	239.2
54	18	0.15	0	0	27	0.15	8	0	8	8	8	8	20.67	160	17.85	0.15	0	0	25.99	0.15	8	0	8	8	8	8	20.69	160
55	2.15	0.09	0	2.15	18	5.54	0	0	0	5.19	17.97	5.06	23.9	101.2	2.14	0.12	0	2.14	18	5.25	0.01	0	0	5.02	17.98	5.01	23.17	100.2
56	5.91	0.12	0	5.91	18	0.1	5.88	0	5.84	5	18	5	6.9	100	5.83	0.05	0	5.72	18	0.05	5.12	0	5.12	5	17.83	5	8.99	100
57	2.6	0.78	0	2.6	18.06	6.4	0	0	0	5.3	18	5.13	29.26	102.6	2.44	0.93	0	2.44	18	6.21	0	0	0	5.04	17.9	5.01	28.89	100.2
58	15.98	0.03	0	0.06	22.9	0.03	12.01	0	12	11.99	6.04	11.99	1.6	239.8	15.01	0.01	0	0.09	21.89	0.01	12	0	12	12	6	12	1.41	240
59	9.99	1.02	0	9	28.97	0.01	1.01	0	1	0	27	0	5.5	0	9.98	1.02	0	9	28.69	0.02	1	0	1	0	27	0	4.73	0
60	0.01	0.21	0	29.01	1	0.21	9	0	9	9	30	9	32.3	180	0.01	0.23	0	30.01	0	0.23	9.98	0	9.98	9	30	9	33.49	180
61	2.11	0.6	0	2.11	18.02	6.45	0	0	0	5.36	18.01	5.1	21.29	102	2.01	0.29	0	2.01	18.02	5.99	0	0	0	5.08	17.98	5.03	20.02	100.6
62	0.04	0.04	0	28.9	1	0.04	8.99	0	8.99	8.99	29.76	8.99	10.2	179.8	0.02	0.05	0	30.02	0	0.05	9.93	0	9.93	9	30	9	10.31	180
63	6.99	0.09	0	6.96	20	0.09	6	0	6	6	18.99	6	9.64	120	7	0.06	0	6	20	0.06	6	0	6	6	18	6	10.01	120
64	0	0.03	0	29	1	0.03	10	0	10	9.91	30	9	13.3	180	0	0.06	0	30	0	0.05	10	0	9.94	9.99	30	9	13.72	180
65	0.23	0	0	36.39	1	0	11.94	0	11.94	11.88	36.68	11.84	2.54	236.8	1.04	0	0	39.31	0	0	11.92	0	11.92	11.83	38.23	11.37	1.78	227.4
66	0.01	2.3	0	28.98	1	2.29	9.01	0	8.94	9	29.96	9	16.13	180	0	2.54	0	30	0	2.47	9.97	0	9.92	9	30	9	15.56	180
67	5.94	0.07	0	5.92	17.94	0.07	5.94	0	5.94	4.98	17.9	4.98	12.99	99.6	5.83	0.21	0	5.81	17.97	0.2	5.88	0	5.88	5	17.93	5	11.45	100
68	2.33	0.78	0	2.33	18.04	6.78	0	0	0	5.33	18	5.15	18.4	103	2.26	0.55	0	2.26	18.01	6.4	0	0	0	5.15	17.97	5.03	18.39	100.6
69	1.35	0.91	0	1.35	18.01	6.38	0	0	0	5.08	17.98	5.02	21.19	100.4	1.43	0.29	0	1.43	17.98	5.53	0	0	0	5	17.73	5	21.87	100
70	6	0.07	0	6	18.99	0.07	6	0	6	6	18.98	6	16.05	120	6.02	0.07	0	6.02	18.99	0.07	6	0	6	6	18.58	6	16.62	120
71	17.94	0.59	0	0	26.95	0.59	8	0	7.99	8	8.02	8	16.66	160	17.75	0.58	0	0	25.97	0.58	8	0	8	8	8	8	16.72	160
72	6.93	0.11	0	5.97	20.96	0.11	6	0	6	6	19.01	6	10.21	120	6.95	0.12	0	5.99	19.99	0.12	6	0	6	6	19	6	10.76	120
73	0	0.02	0	29.98	0	0.02	9	0	9	9	29.96	9	9.63	180	0.01	0.09	0	30.01	0	0.09	9.99	0	9.99	9	30	9	10.83	180
74	10.93	1.02	0.06	8.78	29.4	0.01	1.02	0.05	1.01	0.01	26.6	0	14.37	0	10.95	1	0	8.89	28.93	0	1	0	1	0	26.79	0	14.41	0
75	0	0.6	0	29	1	0.6	9	0	9	9	30	9	26.5	180	0	0.47	0	30	0	0.44	9.99	0	9.99	9	30	9	30.09	180
76	16.01	0	0	0.01	23	0	13	0	13	13	7	12	0.03	240	15.02	0	0	0	22.02	0	12.98	0	12.98	12	7	12	0.02	240
77	0	0.23	0	29	1	0.23	9	0	9	9	30	9	20.37	180	0.01	0.24	0	30.01	0	0.23	9.99	0	9.99	9	30	9	22.89	180
78	16.01	0	0	0.01	23	0	12	0	12	12	6.99	12	0.42	240	15.02	0	0	0	22.02	0	12	0	12	12	6.99	12	0.4	240
79	2.53	0.27	0	2.53	18.05	6.16	0	0	0	5.48	18	5.19	22.8	103.8	2.28	0.16	0	2.28	18.01	5.62	0	0	0	5.14	17.94	5.06	22.03	101.2
80	2.18	0.36	0	2.18	17.96	6.3	0	0	0	5.43	17.94	5.14	27.16	102.8	2.3	0.25	0	2.3	18.02	6.09	0	0	0	5.13	18	5.04	25.95	100.8
81	0	0.01	0	29	1	0.01	9	0	9	9	29.98	9	31.79	180	0	0.01	0	30	0	0.01	9.64	0	9.64	9	30	9	33	180
82	0	1.1	0	28.96	0.99	1.1	8.99	0	8.99	8.99	29.92	8.99	24.73	179.8	0	1.02	0	30	0	1.01	9.93	0	9.92	9	30	9	27.46	180
83	10.23	0.02	0	0.17	17.02	0.02	12	0	12	11.99	6.93	11.99	13.79	239.8	9.01	0.03	0	0.01	16	0.03	12.02	0	12.02	12	7	12	14.43	240
84	5.94	0.14	0	5.94	18	0.14	5.93	0	5.93	5	18	5	8.8	100	5.85	0.09	0	5.72	18	0.09	5.05	0	5.05	5	17.84	5	8.95	100
85	0.01	0.12	0	29.01	1	0.12	9	0	9	9	30	9	39.07	180	0	0.18	0	30	0	0.18	9.82	0	9.82	9	30	9	42.13	180
86	0.01	0.64	0	27.07	1	0.64	9	0	9	9	27.74	9	31.45	180	0	0.66	0	29.01	0	0.66	9	0	9	9	28.6	9	35.04	180
87	0.03	0.03	0	29.98	0.01	0.03	9	0	9	9	29.9	9	23.15	180	0.02	0.06	0	30.02	0	0.06	9.91	0	9.91	9	29.99	9	24.15	180
88	0.1	0	0	36.9	1	0	11.1	0	11.1	11	37.72	11	0.45	220	0.06	0	0.04	37.93	0	0	11.94	0.04	11.94	11.79	37.85	11.06	0.11	221.2
89	0	0.07	0	29	1	0.07	10	0	10	9.96	30	9	8.64	180	0	0.06	0	30	0	0.06	10	0	10	10	30	9	9.4	180
90	0.02	0	0	37.05	0.98	0	12	0	12	12	37.67	11.97	2.77	239.4	0.02	0.01	0	38.67	0	0	11.99	0	11.88	11.97	38.19	11.91	3.92	238.2
91	0.02	2.53	0	29	1	2.53	9	0	9	9	29.95	9	27.42	180	0.13	2.69	0	30.13	0	2.47	9.92	0	9.92	9	29.99	9	30.49	180
92	0	0.04	0.86	23.67	1	0.04	8.03	0.66	8.03	7.72	24.56	7.27	16.6	145.4	0.01	0.01	1.15	25.05	0	0.01	8.16	0.92	8.16	7.76	24.93	7.23	17.36	144.6
93	2.64	0.45	0	2.64	18.02	6.28	0	0	0	5.48	17.98	5.24	19.4	104.8	2.57	0.26	0	2.57	17.96	5.75	0	0	0	5.11	17.92	5.05	20.74	101
94	0.17	0.01	0	31.14	1	0.01	9.09	0	9.08	9	31.95	9	28.26	180	0.13	0	0	32.09	0	0	9.9	0	9.9	9	31.95	9	29.19	180
95	18	0.24	0	0	27	0.24	8	0	8	8	8	8	25.12	160	18	0.16	0.01	0	26.83	0.16	8	0.01	8	8	8	8	26.2	160
96	0.03	0	0	36.63	1	0	12	0	12	11.99	36.91	11.97	1.61	239.4	0	0.14	0	37.62	0	0.14	12	0	12	11.98	37.54	11.93	1.68	238.6
97	2.09	0.35	0	2.09	18.04	5.95	0	0	0	5.21	17.98	5.1	17.84	102	1.89	0.29	0	1.89	17.97	5.49	0	0	0	5.04	17.86	5	16.71	100
98	5.99	1.1	0	5.99	19	0.14	6.96	0	1	6	18.97	6	19.73	120	5.98	1.08	0	5.98	18.96	0.13	6.95	0	1	6	18	6	19.34	120
99	0	1.35	0	28.99	1	1.34	9.01	0	9	9	29.93	9	18.56	180	0.01	1.37	0	30.01	0	1.36	9.73	0	9.73	9	29.99	9	19.47	180
100	1.39	0.76	0	1.39	18	6.06	0	0	0	5.1	18	5.05	24.78	101	1.42	0.82	0	1.42	18	5.92	0	0	0	5.05	17.92	5	24.78	100
101	0.05	1.45	0	29.07	1	1.45	9	0	9	9	29.99	9	14.6	180	0	1.53	0	30	0	1.5	9.96	0	9.96	9	30	9	16.74	180
102	2.94	0.91	0	2.94	18.04	6.72	0	0	0	5.51	17.95	5.2	25.92	104	2.28	0.83	0	2.28	17.99	6.1	0	0	0	5.06	17.8	5.03	24.19	100.6
103	0.01	0.1	0	29.01	1	0.1	9	0	9	9	30	9	17.04	180	0.01	0.12	0	30.01	0	0.11	9.99	0	9.99	9	30	9	19.1	180
104	26.28	0.03	0	0.25	26.03	0.03	11.99	0	11.99	11.99	0	11.98	25.54	239.6	25.16	0.03	0	0.14	25.02	0.03	12	0	12	11.97	0	11.58	26.25	231.6
105	0.01	0.02	0	30.9	1	0.02	9	0	9	9	31.86	9	32.57	180	0	0.02	0	31.94	0	0.02	9.9	0	9.89	9	31.93	9	35.17	180
106	2.44	0.17	0	2.44	18.16	6.06	0	0	0	5.7	18	5.38	18.63	107.6	2.44	0.11	0	2.44	18.08	5.9	0	0	0	5.38	18	5.11	19.46	102.2
107	9.22	0.05	0	9.12	18.87	0.05	5.93	0	5.93	5.87	18.4	5.81	16.11	116.2	8.21	0.07	0	8.17	18.63	0.07	5.96	0	5.96	5.85	18.23	5.81	16.75	116.2
108	0.08	0.34	0	30.85	1	0.34	9.3	0	9.3	8.99	31.74	8.99	23.5	179.8	0.03	0.3	0	31.86	0	0.3	9.89	0	9.89	9	31.83	9	25.05	180
109	2.41	0.29	0	2.41	18.12	6.16	0	0	0	5.56	18.02	5.32	33.22	106.4	2.07	0.54	0	2.05	17.91	6.02	0	0	0	5.1	17.86	5	32.6	100
110	0.02	0	0	36.99	1	0	11.74	0	11.74	11	37.93	11	1.73	220	0.06	0	0	38.01	0	0	11.94	0	11.94	11.53	37.95	10.99	3.1	219.8
111	15.28	0	0	0.13	21.11	0	11.94	0	11.94	11.94	5.94	11.56	10.7	231.2	14.12	0	0	0.04	20.06	0	11.97	0	11.97	11.94	5.96	11	11.02	220
112	0.16	10.88	0	22.17	10	0.89	9.99	0	9.99	0	32	0	10.92	0	0.15	10.75	0	23.08	8.94	0.84	9.92	0	9.92	0	31.87	0	11.04	0
113	0.14	0.04	0	28.99	0.99	0.04	9.44	0	9.44	8.95	29.79	8.95	35.54	179	0.11	0.01	0	29.99	0.01	0	9.93	0	9.86	9	29.88	9	36.29	180
114	15.2	0	0.01	0.08	22	0	12.52	0.01	12.52	11.89	6.87	11.84	4.02	236.8	14.03	0.02	0.01	0.01	20.95	0.02	11.99	0	11.99	11.98	6.91	11.92	4.22	238.4
115	2.17	2.98	0	0.04	5.21	2.97	10.99	0	10.97	10.92	3.08	10	47.57	200	1.41	3.42	0	0.34	4.11	3.39	10.96	0	10.82	9.95	3.04	9.95	48.75	199
116	0	0	0.01	26.02	0.98	0	0	8.01	0	0	26.98	8	43.87	160	0	0	0	26.98	0	0	0	8	0	0	26.97	8	46.44	160
117	9.02	0	0	0.01	15.01	0	11.95	0	11.95	11.94	5.99	11.92	15.29	238.4	8.04	0	0	0	14.04	0	12	0	12	12	6	11.97	13.44	239.4
118	0.01	0	0	36.5	1	0	12	0	12	12	36.95	12	0.17	240	0	0	0	37.85	0	0	12	0	12	12	37.24	12	0.96	240
119	0.25	0.02	0	36.85	1	0.02	11.41	0	11.36	10.92	37.55	10.91	0.74	218.2	0.09	0	0	38.08	0	0	11.89	0	11.89	11.2	37.97	11	0.55	220
120	0	0.21	0	29	1	0.21	9	0	9	9	30	9	29.97	180	0.01	0.24	0	30.01	0	0.24	10	0	10	9	30	9	30.82	180
121	0	2.07	0	28.96	1	2.06	9.01	0	8.92	8.99	29.96	8.99	21.22	179.8	0.01	2.23	0	30.01	0	2.21	9.89	0	9.89	9	30	9	23.36	180
122	15.57	3.43	0	0.33	23.05	3.32	7.35	0	7.14	6.86	7.56	6.8	28.47	136	15.08	3.3	0.03	0.33	22.47	3.24	6.98	0.03	6.77	6.75	7.25	6.69	28.68	133.8
123	0	0.01	0	29	1	0.01	9	0	9	9	30	9	34.9	180	0.01	0.03	0	29.99	0	0.03	9.71	0	9.7	9	29.98	9	35.55	180
124	0	2.96	0	29	1	2.96	9	0	9	9	30	9	22.38	180	0.01	2.67	0	30.01	0	2.67	10	0	10	9	30	9	26.5	180
125	18	0	0	0	27	0	0	8	0	0	9	8	45.73	160	17.99	0	0	0	26.98	0	0	8	0	0	8	8	45.01	160
126	4.09	0.02	0	3.88	17.69	0.01	5.11	0	0	4.99	17.07	4.99	0.94	99.8	3.62	0	0	3.37	17.39	0	5.07	0	0	5	16.42	5	1	100
127	1.2	0.22	0	0.12	11.08	10.01	0.04	0	0.02	9	10	9	44.07	180	0.16	0.26	0.03	0.08	9.97	9.16	0.1	0.03	0.06	8.95	9.86	8.94	43.7	178.8
128	0.26	0.04	0	30.19	1	0.04	9.3	0	9.3	9	30.91	9	22.29	180	0.16	0.02	0	31.06	0	0.02	9.74	0	9.74	9	30.9	9	24.55	180
129	14.3	0.04	0	0.04	20.79	0.03	12	0	11.88	11.97	6	11.97	12.66	239.4	12.42	0.07	0	0.03	18.7	0.07	12	0	12	11.99	6	11.91	14.69	238.2
131	21.98	9.19	0	0.06	30.95	0.19	9	0	8.99	0	8.04	0	41.83	0	21.64	9.3	0	0.05	29.88	0.3	9	0	8.98	0	8.07	0	42.62	0
132	0.01	0	0	28.74	1	0	8.98	0	8.98	8.96	29.71	8.95	48.19	179	0.01	0	0	30.01	0	0	9.96	0	9.96	9	30	9	47.38	180
133	0.14	0.3	0	28.09	1	0.3	9.66	0	9.66	9	28.92	9	14.5	180	0.18	0.27	0	29.12	0	0.27	9.8	0	9.8	8.95	28.92	8.95	15.96	179
134	0.14	0	0	39.57	1.01	12.85	0	0	0	12.73	40.4	12.42	3.05	248.4	0.49	0.03	0	38.82	0	12.56	0.05	0	0.04	12.55	37.97	12.36	7.27	247.2
135	0	1.16	0	29	1	10.16	0	0	0	9	29.99	9	59.4	180	0.01	1.19	0	30.01	0	10.24	0	0	0	9	30	9	63.21	180
136	0.04	0	0	36.49	1	0	11.94	0	11.94	11.28	37.44	11	0.46	220	0.04	0	0	37.51	0	0	11.99	0	11.99	11.94	37.43	11.3	0.79	226
137	2.3	0.37	0	2.3	17.97	5.87	0	0	0	5.19	17.9	5.08	32.03	101.6	2.42	0.39	0	2.42	17.93	5.61	0	0	0	5.04	17.85	5	31.16	100
138	0.37	0.16	0.03	41.17	0.99	13.92	0.01	0.04	0	13.74	41.51	13.61	7.11	272.2	0	1.16	0	41.9	0	14.07	0.96	0	0	13.8	41.9	13.31	6.06	266.2
139	2.82	0.13	0	2.8	18.13	6.04	0	0	0	5.56	17.99	5.32	19.68	106.4	2.25	0.16	0	2.25	18.01	5.6	0	0	0	5.06	17.96	5.03	18.28	100.6
140	2.56	1	0	2.56	18.02	6.86	0	0	0	5.49	17.91	5.3	18.86	106	2.5	0.76	0	2.5	18.02	6.45	0	0	0	5.32	17.96	5.11	19.28	102.2
141	5.88	0.01	0	5.88	18	0.01	5.86	0	5.86	5	17.98	5	7.87	100	5.95	0.03	0	5.94	18	0.03	5.14	0	5.14	5	17.95	5	6.01	100
142	1.91	0.32	0	1.91	18.02	5.99	0	0	0	5.16	17.97	5.06	16.83	101.2	1.87	0.26	0	1.87	17.97	5.53	0	0	0	5.07	17.72	5.03	16.88	100.6
143	0	0.39	0	28.91	1	9.36	0.02	0	0.01	8.97	29.91	8.97	49.12	179.4	0.01	0.31	0	30.01	0	10.23	0	0	0	9	30	9	49.54	180
144	18	0	0	0	27	9	0	0	0	8	9	8	42.18	160	18	0	0	0	27	8	0	0	0	8	9	8	40	160
145	0.84	0.68	0	28.31	1	0.68	9.49	0	9.42	8.98	28.43	8.96	21.32	179.2	0.9	0.51	0	29.53	0	0.51	9.75	0	9.75	9.05	28.63	9	21.82	180
146	18	0.02	0	0	27	0.02	8	0	8	8	8	8	19.99	160	17.99	0.07	0	0	26.77	0.07	8	0	8	8	8	8	20.1	160
147	2.6	0.66	0	2.6	18.01	6.32	0	0	0	5.3	18	5.08	27.57	101.6	2.61	0.74	0	2.61	18	6.13	0	0	0	5.03	17.94	5	27.54	100
148	2.07	0.64	0	2.06	18.01	6.31	0	0	0	5.14	18	5.05	19.24	101	1.99	0.49	0	1.99	18	5.83	0	0	0	5.06	17.96	5	19.04	100
149	12.96	0	0	8.98	22.67	0	0	0	0	0	17.95	0	74.58	0	11.02	0	0	9.01	20.94	0	0	0	0	0	17.99	0	74.06	0
150	0.11	0.17	0	28.71	1	0.17	9.95	0	9.95	9.19	29.58	9	25.33	180	0.06	0.22	0	29.51	0	0.22	10	0	10	9.6	29.45	9.02	27.4	180.4
151	0.03	0	0	35.95	1	0	12	0	12	11.99	36.53	11.99	3.2	239.8	0.06	0	0.01	37.45	0	0	12	0.01	12	12	36.99	11.94	3.46	238.8
152	4.9	12.02	0	19.8	13.02	0.01	12.08	0	12.08	0	27.81	0	33.69	0	4.94	12.03	0	20.85	11.99	0	12.54	0	12.54	0	27.85	0	37.31	0
153	2.48	0.44	0	2.48	17.94	6.12	0	0	0	5.33	17.85	5.19	27.43	103.8	2.22	0.3	0	2.22	17.99	5.61	0.01	0	0	5.02	17.94	5.02	26.29	100.4
154	9.4	0.01	0	10.36	19.89	0	0.01	0	0.01	0	19.93	0	65.97	0	10.24	0	0	11.28	19.01	0	0	0	0	0	20	0	70.77	0
155	2.12	0.46	0	2.11	17.89	6.22	0	0	0	5.13	17.86	4.97	19.24	99.4	1.8	0.58	0	1.8	17.96	6.05	0	0	0	5.04	17.83	5.02	18.51	100.4
156	7.68	0.07	0	0.41	18.5	11.01	0.04	0	0.03	10.77	10.92	10.68	17.98	213.6	6.75	0	0	0.59	17.33	10.64	0.02	0	0.01	10.63	10.78	10.57	18.01	211.4
157	0.27	10.34	0	0.24	16.3	0.29	10.09	0	10.09	0	15.9	0	21.25	0	0.17	10.24	0	0.11	16.55	0.28	10.2	0	10.18	0	16.3	0	19.99	0
158	26.02	0.04	0.01	0.02	26.12	0.04	12	0.01	12	12	0	12	16.33	240	25.06	0.07	0	0.04	25.02	0.07	11.98	0	11.98	11.98	0	11.97	16.24	239.4
159	20.03	0	0	0.03	30	0	0	0	0	0	10	0	47.13	0	20	0	0	0	30	0	0	0	0	0	10	0	45.94	0
160	18	0.62	0	0	27	9.61	0	0	0	8	9	8	18.46	160	18	0.5	0	0	27	9.22	0	0	0	8	9	8	18.35	160
161	6.3	1.86	0.01	34.88	1	1.85	9.32	0	9.26	9.02	29.31	8.88	7.23	177.6	6.85	1.64	0.03	35.93	0	1.6	9.12	0.01	8.98	8.93	28.8	8.78	9.12	175.6
162	34.87	0	0	2.89	32.76	0	0	0	0	0	0.02	0	59.09	0	33.88	0	0	2.9	31.35	0	0	0	0	0	0.01	0	60.08	0
163	0.82	0.01	0.02	28.8	1	0.01	9.2	0.02	9.2	8.99	28.98	8.98	28.78	179.6	0.42	0	0	29.42	0	0	9.79	0	9.79	9	29	9	29.49	180
164	30.02	0	0	0.02	36.92	0	0	12	0	0	6	12	34.1	240	29.01	0	0	0.01	35.74	0	0	12	0	0	6	12	34.93	240
165	2.64	0.83	0	2.64	18.1	6.71	0	0	0	5.42	18.05	5.21	28.69	104.2	2.77	1.47	0	2.77	18.01	7.1	0	0	0	5.27	17.91	5.12	27.15	102.4
166	7	0.06	0	6	21	6.06	0	0	0	6	19	6	53.82	120	6.98	0.07	0	6	19.99	6.07	0	0	0	6	19	6	54.9	120
167	0.01	0	0	12.02	11.81	0	0	0	0	0	23.01	0	31.5	0	0.03	0	0	13.04	10.92	0	0	0	0	0	23.01	0	31.19	0
168	32.43	0	0.04	0.43	32.78	0	0	9.02	0	0	0.01	8.98	37.8	179.6	31.86	0.01	0.03	0.85	31.69	0	0.01	8.84	0	0	0.01	8.81	36.66	176.2
169	10.93	0.16	0	0.15	19.39	0.16	9	0	9	9	8.61	8.98	21.8	179.6	9.15	0.1	0	0.01	18.07	0.1	9	0	9	9	8.93	8.94	22.57	178.8
170	10	0.61	0	0	19	0.61	9	0	8.99	9	9	9	13.57	180	9.01	0.52	0	0.01	18	0.52	9	0	9	9	9	8.82	14.56	176.4
171	0	0.04	0	0	11	9.04	0	0	0	9	11	9	46.61	180	0.16	0.06	0	0.16	9.98	9.09	0.01	0	0	8.99	9.97	8.99	47.17	179.8
173	2.08	0.18	0	2.07	17.96	5.86	0	0	0	5.21	17.91	5.05	20.78	101	2.09	0.3	0	2.08	17.92	5.5	0	0	0	4.98	17.87	4.95	19.54	99
174	10	0.02	0	0	19	0.02	9	0	9	9	9	9	14.05	180	9.02	0	0	0	18.01	0	9	0	9	9	8.99	8.97	15.71	179.4
175	26.99	0	0	0.01	27.92	0	0	9	0	0	0.02	9	50.31	180	26.98	0	0	0	27	0	0	8.97	0	0	0.02	8.89	51.36	177.8
176	0.01	0	0	34.33	1	0	11.98	0	11.98	11.96	35.02	11.64	1.46	232.8	0.01	0	0.02	35.9	0	0	12	0.02	12	11.99	35.18	11.92	1.52	238.4
