# Supplementary material
Source: ML conference proceedings conference paper supplement (https://openreview.net/forum?id=ebe9uW2yQA)
Supplement: supplementary_material [file event_count_br.xlsx]

## Sheet: Events
	1-put_onion_on_X_by_agent0	1-put_dish_on_X_by_agent0	1-put_soup_on_X_by_agent0	1-pickup_onion_from_X_by_agent0	1-pickup_onion_from_O_by_agent0	1-pickup_dish_from_X_by_agent0	1-pickup_dish_from_D_by_agent0	1-pickup_soup_from_X_by_agent0	1-USEFUL_DISH_PICKUP_by_agent0	1-SOUP_PICKUP_by_agent0	1-PLACEMENT_IN_POT_by_agent0	1-delivery_by_agent0	1-STAY_by_agent0	1-sparse_r_by_agent0	0-put_onion_on_X_by_agent1	0-put_dish_on_X_by_agent1	0-put_soup_on_X_by_agent1	0-pickup_onion_from_X_by_agent1	0-pickup_onion_from_O_by_agent1	0-pickup_dish_from_X_by_agent1	0-pickup_dish_from_D_by_agent1	0-pickup_soup_from_X_by_agent1	0-USEFUL_DISH_PICKUP_by_agent1	0-SOUP_PICKUP_by_agent1	0-PLACEMENT_IN_POT_by_agent1	0-delivery_by_agent1	0-STAY_by_agent1	0-sparse_r_by_agent1
1	0.01	0	0	0	24.2	0	19.95	0	19.95	19.83	24.19	19	0.93	380	0	0.8	0.05	0	1	0.8	24.94	0.04	24.9	24.08	1	23.95	41.33	479
2	0	0	0	0	47.99	0	14	0	14	14	47.88	14	0.09	280	0	0	0	0	31.73	0	8.94	0	8.67	8.94	30.76	8.94	6.94	178.8
3	0.04	0.02	0	0.04	31.88	0.02	9.94	0	9.86	9.94	31.87	9.92	20.09	198.4	0	0.03	0	0	25	0.03	8	0	8	8	24.87	8	44.51	160
4	0	0	0	0	77.99	0	0	0	0	0	77.82	0	10.05	0	0.85	0.1	0.04	0.85	13.67	0.09	23.73	0.04	23.66	23.71	12.86	23.7	28.04	474
5	0.2	0	0.2	0.13	44.06	0	13.41	0.17	13.41	13.35	43.55	13.23	2.57	264.6	0	0.01	0	0	31.92	0	9.87	0	9.84	9.57	31.67	9.41	3.11	188.2
6	0	0	0.01	0	47.83	0	13.96	0.01	13.94	13.96	47.78	13.96	0.1	279.2	0.04	1.24	0	0.04	24.95	1.23	7.99	0	7.96	7.98	24.64	7.98	19.8	159.6
7	0.03	1.07	0	0.02	51.85	0.07	1.01	0	1	0.01	50.94	0.01	55.13	0.2	0	0.68	0	0	0	0.67	25.01	0	24.76	24	0	24	54.21	480
8	0	0	0	0	77.96	0	0	0	0	0	77.86	0	20.3	0	0	0.89	0	0	25	0.88	8.01	0	7.99	8	24.81	8	24.49	160
9	0.01	0	0	0.01	78	0	0	0	0	0	77.87	0	1.42	0	0.01	0	0	0.01	27	0	8	0	8	8	26.91	8	40.1	160
10	0.74	0.02	0.7	0.43	25.46	0.01	14.4	0.68	13.14	14.33	24.92	14.08	26.02	281.6	0.17	0	0	0.15	23.78	0	23.94	0	23.94	23.93	22.88	23.92	2.96	478.4
11	0	0	0.01	0	46.93	0	14	0.01	14	14	46.26	14	0.07	280	0.01	0.67	0	0.01	24.99	0.67	8	0	7.92	7.99	24.83	7.99	43.61	159.8
12	0.01	0	0	0	27.03	0	20.9	0	20.9	20.83	26.99	19.99	1.27	399.8	0	3.51	0	0	0	3.5	24.83	0	24.57	23.9	0	23.88	45.44	477.6
13	0	0	0	0	29.36	0	20.67	0	20.67	20.38	29.28	19.97	0.17	399.4	0	4.92	0	0	0	4.91	24.77	0	24.43	23.89	0	23.86	42.14	477.2
14	0.03	0.03	0	0.03	77.84	0.02	0.01	0	0	0	77.32	0	14.14	0	10.96	0.01	0	10.94	35.85	0	0.01	0	0	0	35.52	0	26.96	0
15	0	0	0	0	27.04	0	21	0	21	21	27.04	20.59	1.26	411.8	0	0.59	0	0	0	0.59	24.99	0	24.92	23.99	0	23.99	47.22	479.8
16	0.01	0	0	0	77.96	0	0	0	0	0	77.55	0	15.41	0	0.03	0.01	0	0.01	23.98	0.01	23.97	0	23.97	23.97	22.99	23.97	2.78	479.4
17	0.01	0	0.09	0	30.42	0	19.73	0.09	19.73	19.68	30.14	19.63	0.45	392.6	0	1.96	0	0	0	1.96	24.01	0	23.97	23.24	0	23.07	51.94	461.4
18	0.01	0	0	0	29.01	0	20	0	20	20	28.98	20	1.21	400	0	0.79	0	0	0	0.79	25	0	25	24	0	24	78.84	480
19	0	0	0	0	78	0	0	0	0	0	77.84	0	21.16	0	0	0.07	0	0	13.98	0.07	24	0	24	24	13	24	27.51	480
20	0	1	0	0	68.74	0	1	0	1	0	68.45	0	19.5	0	0.02	2.5	0	0.01	0.01	2.48	24.59	0	24.34	23.93	0	23.88	28.79	477.6
21	0	0.01	0.01	0	77.07	0	0.02	0.01	0	0.01	76.24	0	18.16	0	0.07	1.28	0.05	0.07	1.01	1.25	24.85	0.05	15.96	24.45	1	24.11	67.38	482.2
22	0	0	0	0	78	0	0	0	0	0	77.92	0	8.86	0	0.35	2.82	0	0.35	34.68	1.66	1.66	0	1	0.49	34.19	0.48	22.15	9.6
23	0	0	0	0	78	0	0	0	0	0	77.91	0	3.37	0	0.02	1.3	0	0.02	25.4	0.76	8.48	0	5.21	7.94	24.86	7.91	26.31	158.2
24	0.01	0	0	0.01	77.61	0	0	0	0	0	76.94	0	19.47	0	11.02	1.09	0	11.02	35.99	0.09	1	0	1	0	35.83	0	10.83	0
25	0	0	0	0	77.89	0	0	0	0	0	77.38	0	5.04	0	0	0.02	0	0	13.78	0.02	24	0	24	24	13	23.98	19.71	479.6
26	0.01	0	0	0	31.36	0	18.98	0	18.98	18.98	31.09	18.98	1.08	379.6	0.09	0	0	0.01	23.89	0	23.92	0	23.92	23.89	22.99	23.89	4.16	477.8
27	0.01	0	0	0.01	77.98	0	0	0	0	0	77.51	0	15.59	0	0.01	0.3	0	0.01	21.11	0.13	9.59	0	0	9.24	21	9.09	44.21	181.8
28	0	0	0.07	0	42.63	0	13.87	0.07	0	13.87	42.32	13.79	0.74	275.8	3.51	0.58	0	3.02	24.46	0.5	6.9	0	0	6.69	23.62	6.68	32.42	133.6
29	0	0	0	0	77.88	0	0	0	0	0	77.27	0	22.53	0	0.02	0	0	0.02	39.93	0	0	0	0	0	39.81	0	0.03	0
30	0	0	0	0	48	0	14	0	14	14	48	14	0.01	280	0	0.43	0	0	25	0.43	8	0	8	8	24.93	8	34.73	160
31	0.55	0.02	0	0.52	31.22	0.01	14.3	0	11.62	13.97	31	13.75	1.03	275	0	0.03	0	0	13.01	0.02	23.76	0	23.53	23.69	12.8	23.59	47.96	471.8
32	0	0	0	0	77.99	0	0	0	0	0	77.87	0	14.3	0	0	0.13	0	0	24.99	0.13	8	0	8	8	24.77	8	46.11	160
33	0	0	0	0	24.27	0	19.67	0	19.67	19.31	24.26	18.87	4.3	377.4	0	0.04	0	0	0	0.04	24.85	0	24.85	23.98	0	23.96	61.4	479.2
34	0.08	0	0	0.02	27.86	0	18.66	0	18.66	18.46	27.67	18.15	1.07	363	0	0.32	0	0	0	0.32	24	0	24	23.01	0	23	50.57	460
35	0.02	0	0.03	0.01	31.4	0	18.89	0.03	18.89	18.88	30.97	18.66	2.42	373.2	0.02	0.02	0	0.02	15.13	0.02	23.84	0	23.84	23.72	15.01	23.57	27.4	471.4
36	0	0	0	0	44.23	0	13.94	0	13.94	13.93	43.43	13.93	0.16	278.6	0	0.05	0	0	24.99	0.03	8.02	0	7.84	8	24.91	8	36.46	160
37	0	0	0	0	48	0	14	0	14	14	47.97	14	0.11	280	0.53	0	0	0.51	31.6	0	8.94	0	8.94	8.94	31.04	8.93	9.85	178.6
38	0	0.01	0	0	28.02	0.01	17.94	0	17.94	17	28.02	17	19.65	340	0.01	0	0	0	13.92	0	23.99	0	23.99	23.99	12.99	23.99	33.49	479.8
39	0	0	0	0	29.16	0	20.79	0	20.79	20	29.14	19.98	0.93	399.6	0	0.34	0	0	0	0.33	25	0	24.75	24	0	24	76.64	480
40	0.45	1.71	0	0.41	51.46	0.18	1.55	0	1	0	50.79	0	35.13	0	0	0.33	0	0	0	0.33	23.23	0	22.94	22.72	0	22.49	23.86	449.8
41	0.03	0.02	0	0.01	67.88	0	0.02	0	0.02	0	67.36	0	29.09	0	11.89	1.04	0	11.89	35.99	0.04	1	0	1	0	35.87	0	11.59	0
42	0.01	0	0	0.01	73.77	0	0	0	0	0	73.14	0	21.99	0	23.59	0	0	23.36	38.97	0	0	0	0	0	38.4	0	6.04	0
43	0.76	0	0	0.74	77.55	0	0	0	0	0	77.4	0	21.84	0	0	0.02	0	0	27	0.02	8	0	8	8	26.9	8	30.96	160
44	0	0	0	0	38.55	0	12.04	0	0	11.86	38.51	11.79	1.04	235.8	0	0	0	0	31.99	0	9	0	0	9	31.86	9	10.48	180
45	0	0	0	0	77.99	0	0	0	0	0	77.79	0	17.12	0	9.94	0.15	0	9.7	40.51	0.07	0.11	0	0.09	0.03	39.97	0.03	6.47	0.6
46	10.68	0.03	0.2	10.2	4.16	0.02	1.52	0.2	1.33	1.36	3	1.31	1.19	26.2	0.01	1.12	0	0	13.64	1.09	24.02	0	23.53	23.95	12.88	23.91	15.69	478.2
47	0.01	0	0	0	30.99	0	19.97	0	19.97	19.96	30.39	19.95	0.11	399	0	1.03	0	0	0	1.03	23.98	0	23.98	23.03	0	23	74.39	460
48	0	0	0	0	77.99	0	0	0	0	0	77.92	0	16.97	0	0.01	0.69	0	0	13.43	0.69	24.99	0	24.99	24.88	13.42	24.46	33.5	489.2
49	0	0	0	0	30.94	0	18.62	0	18.62	18.42	30.79	18.1	2.86	362	0	0	0	0	13.85	0	24	0	23.87	23.99	12.97	23.99	34.49	479.8
50	0	0	0	0	48	0	14	0	14	14	47.99	14	0	280	0	0.01	0	0	24.8	0	7.94	0	7.93	7.93	24.75	7.93	39.43	158.6
51	0.01	0	0	0	28.07	0	20.99	0	20.99	20.98	28.06	20.85	0.07	417	0	0.62	0	0	0	0.62	25	0	25	24	0	24	52.3	480
52	0	0.01	0	0	75	0	0.01	0	0	0	74.5	0	9.79	0	0.22	1.81	0.02	0.2	22.7	0.34	5.63	0.01	0	4	22.34	3.95	24.68	79
53	0	0	0.02	0	28.1	0	17.85	0.02	17.85	17	28.09	16.99	15.82	339.8	0	0	0	0	24.97	0	23.96	0	23.77	23.95	24.97	23.94	1.37	478.8
54	0.01	0	0.01	0	28.02	0	20.94	0.01	20.94	20.9	27.99	20.44	1.3	408.8	0	0.2	0	0	0	0.2	25	0	25	24	0	24	45.33	480
55	0.01	0	0	0	29.21	0	20.91	0	20.91	20.61	29.19	19.96	0.06	399.2	0	0.19	0	0	1	0.19	25	0	25	24.01	1	24	58.71	480
56	0	0	0.03	0	28.02	0	17.81	0.03	17.81	17	28.02	17	9.97	340	0.08	0	0	0	23.76	0	23.97	0	23.97	23.97	22.81	23.96	5.79	479.2
57	0	0	0	0	77.94	0	0	0	0	0	77.28	0	21.26	0	0.17	0.1	0	0.15	34.96	0	0.16	0	0	0.06	34.46	0.06	19.77	1.2
58	0	0	0.01	0	28.02	0	17.94	0.01	17.94	17.01	28.02	17	11.05	340	0	0	0	0	25	0	24	0	24	23.99	25	23.97	2.89	479.4
59	0.08	0.09	0	0.04	61.09	0.02	2.87	0	0.35	2.8	60.48	2.79	19.22	55.8	0	0.35	0	0	1	0.34	24.01	0	23.9	23.22	1	23.06	67.87	461.2
60	0	0.02	0	0	42	0.01	13.99	0	13.87	13.98	41.99	13.96	5.65	279.2	0	0.24	0	0	25	0.24	8	0	8	8	24.89	8	38.68	160
61	0.03	0.01	0	0.02	77.63	0	0.01	0	0	0	77.02	0	10.86	0	0.04	0	0	0.04	39.63	0	0	0	0	0	39.53	0	1.11	0
62	0.01	0	0	0.01	77.99	0	0	0	0	0	77.71	0	24.48	0	0.06	1.24	0	0.03	37.35	0.18	1.12	0	1	0.06	36.96	0.06	7.7	1.2
63	0.17	0.14	0	0.1	31.15	0.01	13.73	0	4.12	13.45	30.83	13.24	22.6	264.8	0.16	2.31	0	0.14	21.1	0.43	5.43	0	1.09	3.1	20.62	3.1	27.85	62
64	0	0.02	0.01	0	28.05	0.02	17.91	0.01	17.91	17	28.05	17	9.13	340	0	0	0	0	23.99	0	24	0	24	24	23	24	6.85	480
65	0	0	0	0	48	0	14	0	14	14	47.99	14	0.02	280	5.98	0	0	5.98	33	0	10	0	10	10	32.98	9.99	8.66	199.8
66	0.01	0	0	0.01	70.18	0	0	0	0	0	69.62	0	24.02	0	0	0	0	0	1	0	24.19	0	1.01	23.76	1	23.73	61.31	474.6
67	0.05	0	0	0.03	31.36	0	18.78	0	18.78	18.75	31.13	18.54	1.72	370.8	0.02	0	0	0.01	24.84	0	23.96	0	23.96	23.93	24.83	23.76	2.56	475.2
68	0.06	0	0.09	0.05	32.89	0	17.95	0.09	17.95	17.89	32.53	17.74	1.5	354.8	0.03	0.08	0	0.02	13.64	0.07	23.74	0	23.65	23.7	12.8	23.7	16.98	474
69	0.01	0	0	0.01	77.99	0	0	0	0	0	77.93	0	13.68	0	0	0.02	0	0	24.97	0.01	8	0	7.83	7.99	24.68	7.99	32.57	159.8
70	0.05	0.01	0	0.05	51.87	0	0.01	0	0.01	0	50.96	0	37.21	0	0	1.48	0	0	0	1.48	24.73	0	24.72	23.83	0	23.77	57.92	475.4
71	0.01	0	0	0	28.17	0	17.01	0	17.01	16.99	28.15	16.78	21.44	335.6	0.02	0	0	0.01	24.01	0	23.94	0	23.94	23.94	23.08	23.94	4.63	478.8
72	0.05	0.02	0.19	0.02	39.31	0	12.18	0.18	12.05	12	39	11.84	0.87	236.8	0	0.11	0	0	25.2	0.11	8	0	7.67	7.98	24.93	7.98	2.52	159.6
73	0	0	0	0	42	0	14	0	14	14	42	14	15.33	280	0.09	0.04	0	0.09	32	0.04	10	0	10	9.94	32	9	6.14	180
74	0.16	0.09	4.91	0.08	18.6	0.09	11.46	4.74	11.42	11.41	18.43	10.64	7.69	212.8	0.02	0	0	0.01	24.43	0	23.99	0	23.91	23.99	23.85	23.99	2.76	479.8
75	0.07	0	0	0.07	77.74	0	0	0	0	0	77.08	0	8.22	0	0.02	0	0	0	13.14	0	25	0	25	24.98	13.12	24.83	17.1	496.6
76	0	0	0	0	42	0	14	0	14	14	42	14	3.7	280	0	0	0	0	25	0	8	0	8	8	24.91	8	56.02	160
77	0.01	0	0.01	0	37.79	0	16.99	0.01	16.89	16.97	37.07	16.95	0.11	339	0.01	0	0	0.01	24.49	0	24	0	24	23.99	24.07	23.95	0.87	479
78	0.06	0	0	0.03	27.33	0	20.93	0	20.93	20.88	27.29	20.08	1.93	401.6	0	0.26	0	0	0	0.26	25	0	24.96	24	0	24	83.24	480
79	0	0	0	0	77.98	0	0	0	0	0	77.91	0	0.29	0	21.44	0	0	19.77	2.66	0	0	0	0	0	0	0	1.03	0
80	0.24	0	0	0.23	55.61	0	0.02	0	0	0.02	54.98	0.02	52.61	0.4	0	4.46	0	0	0	4.46	24.87	0	24.85	23.99	0	23.98	48.49	479.6
81	0.01	0	0	0	27.98	0	20.99	0	20.99	20.97	27.97	20.02	0.3	400.4	0	0.4	0	0	0	0.4	25	0	25	24	0	24	67.18	480
82	0	0	0	0	29.21	0	20.77	0	20.77	20.05	29.16	19.99	1.25	399.8	0.18	0.13	0	0.11	1.08	0.13	24.92	0	24.92	23.98	1.01	23.98	71.36	479.6
83	0.02	0	0	0.02	77.88	0	0.01	0	0.01	0.01	77.7	0.01	18.78	0.2	0	0.38	0	0	24.99	0.38	8	0	7.96	7.99	24.86	7.99	42.85	159.8
84	0.03	0.01	0	0.01	29.58	0	19.68	0	19.63	19.61	29.11	19.53	1.57	390.6	0	1.98	0	0	0	1.95	24.01	0	23.99	23.3	0	23.15	103.6	463
85	0.01	0	0	0.01	77.76	0	0	0	0	0	76.94	0	17.87	0	20.87	0.03	0	20.38	36.93	0	0.03	0	0	0	35.93	0	15.01	0
86	0	0	0	0	77.86	0	0	0	0	0	77.18	0	20.7	0	7.01	0	0	6.03	31	0	9.86	0	0	9.02	30	9.02	0.32	180.4
87	0	0	0	0	77.98	0	0	0	0	0	77.81	0	17.2	0	0	0.03	0	0	25	0.03	8	0	8	8	24.88	8	42.65	160
88	1.07	0	0	1.05	31.64	0	18.88	0	18.88	18.88	30.81	18.87	0.69	377.4	0.4	0	0	0.38	23.29	0	23.81	0	23.49	23.78	22.41	23.78	7.62	475.6
89	0	0	0.02	0	37.84	0	17	0.02	17	17	37.01	17	0.07	340	6.31	0.02	0	4.91	11.92	0.01	21.27	0	21.25	20.85	10.38	20.66	19.07	413.2
90	0.11	0	0	0.11	77.93	0	0	0	0	0	77.84	0	7.34	0	0	0.76	0	0	25	0.76	8	0	8	8	24.84	8	35.83	160
91	0	0.01	0.01	0	28.02	0.01	17.93	0.01	17.93	17	28.01	17	22.68	340	0	0	0	0	23.99	0	24	0	24	24	23.04	23.99	5.43	479.8
92	0	0	0	0	27.99	0	20.99	0	20.99	20.94	27.99	20	0.27	400	0	1.67	0	0	0	1.67	25	0	25	24	0	24	60.04	480
93	0	0	0	0	78	0	0	0	0	0	77.92	0	15.46	0	0	0.41	0	0	24.9	0.4	7.97	0	7.95	7.96	24.79	7.96	42.92	159.2
94	0.01	0	0	0.01	77.67	0	0	0	0	0	77	0	22.03	0	0	0	0	0	40	0	0	0	0	0	40	0	0	0
95	0.88	0	0	0.31	42.98	0	10.08	0	10.08	10.02	41.98	9.88	3.21	197.6	0	0.25	0	0	1	0.24	25.01	0	24.82	24.02	1	24	91.95	480
96	0.01	0.05	0.01	0	34.06	0.05	15.81	0.01	15.81	15.7	33.75	15.61	9.33	312.2	0	0	0	0	19.32	0	23.83	0	23.83	23.81	18.88	23.77	9.26	475.4
97	0	0	0	0	28.15	0	20.98	0	20.98	20.92	28.15	20.52	0.08	410.4	0	0.44	0	0	0	0.44	25	0	25	24	0	24	57.12	480
98	0	0	0	0	48	0	14	0	14	14	48	14	0.04	280	6.33	0	0	6.28	33	0	9.99	0	9.96	9.99	32.9	9.98	7.82	199.6
99	0	0	0	0	78	0	0	0	0	0	78	0	4.1	0	0	0.01	0	0	24.88	0.01	7.97	0	7.93	7.97	24.74	7.96	21.37	159.2
100	0	0	0	0	77.99	0	0	0	0	0	77.91	0	0.1	0	0	0.9	0	0	18.7	0.63	6.36	0	6.08	5.65	18.57	5.61	47.44	112.2
101	0	0	0	0	43.71	0	13.89	0	13.89	13.89	42.72	13.89	0	277.8	0	0.02	0	0	31.81	0.02	9.16	0	9.01	9.15	31.57	9.15	5.36	183
102	0.06	0.01	0	0.06	74.55	0	0.01	0	0	0	74.01	0	21.65	0	0.07	0.25	0	0.06	35.2	0.06	2.87	0	0	2.67	34.81	2.67	6.57	53.4
103	0	0.01	0	0	77.97	0	0.01	0	0.01	0	77.55	0	7.71	0	0.03	0	0	0.03	24.05	0	23.98	0	23.98	23.98	23.2	23.97	8.09	479.4
104	0.01	0	0	0	27.95	0	20.99	0	20.99	20.98	27.93	20.02	1.44	400.4	0	2.1	0	0	0.01	2.09	25	0	24.97	24.01	0.01	24.01	49.35	480.2
105	4.14	0	2.11	0.92	20.3	0	14.82	2.09	14.66	14.62	16.79	14.38	11.37	287.6	0	0.08	0	0	0	0.08	25	0	25	24	0	24	131.84	480
106	0.02	0	0	0.02	78	0	0	0	0	0	77.68	0	10.13	0	0	0.01	0	0	23.83	0.01	24	0	24	23.99	22.89	23.99	3.71	479.8
107	0.02	0	0	0.02	77.94	0	0	0	0	0	77.57	0	11.23	0	0	0.01	0	0	13.96	0	24.01	0	23.82	24	13	24	41.43	480
108	0.41	45.55	0	0.4	5.82	44.79	1.8	0	1.52	0.79	5.81	0.79	16.39	15.8	0	0	0	0	31.99	0	9	0	9	9	31.96	9	1.03	180
109	0	0	0.02	0	42	0	14	0.02	13.88	13.99	42	13.88	9.6	277.6	0.01	0.07	0	0.01	31.99	0.07	9	0	9	9	31.62	9	7.71	180
110	0	0	0.04	0	28.02	0	17.61	0.04	17.61	17	28.02	16.98	14.57	339.6	0.01	0	0	0	23.86	0	23.99	0	23.99	23.98	22.91	23.97	5.27	479.4
111	0.01	0	0	0.01	30.9	0	20	0	20	20	30.73	19.98	0.18	399.6	0	0.25	0	0	1	0.23	24.08	0	23.76	23.56	1	23.32	81.32	466.4
112	0	0.01	0.02	0	50.25	0	11.93	0.02	11.89	11.92	49.68	11.92	0.91	238.4	0	0.45	0	0	1.01	0.44	19.77	0	19.49	19.06	1.01	18.98	51.97	379.6
113	0.17	0.3	0	0.17	75.59	0.28	0.02	0	0	0	74.86	0	18.56	0	0	0	0	0	40	0	0	0	0	0	39.99	0	0.07	0
114	0	0	0	0	77.97	0	0	0	0	0	77.61	0	15.17	0	11	1.12	0	11	35.96	0.11	1.01	0	0.99	0	35.94	0	32.33	0
115	0	0	0.07	0	28.85	0	16.72	0.07	16.72	16.29	28.76	16.01	14.84	320.2	0	0	0.01	0	24.89	0	23.9	0	23.53	23.85	24.87	23.78	2.32	475.6
116	0	0	0.02	0	36.97	0	16.01	0.02	16.01	16	36.84	16	16.97	320	0	0	0	0	23.53	0	23.98	0	23.98	23.96	23.05	23.95	2.98	479
117	0.08	0	0	0.07	64.29	0	0	0	0	0	63.63	0	27.27	0	0.04	0	0	0.04	40.51	0	0	0	0	0	39.83	0	5.2	0
118	0	0	0	0	78	0	0	0	0	0	77.72	0	23.28	0	0	0.28	0	0	24.93	0.27	7.98	0	7.96	7.97	24.6	7.97	24.88	159.4
119	0.01	0	0	0	31.03	0	19.99	0	19.82	19.99	30.95	19.99	0.03	399.8	0	0.88	0	0	0	0.87	24	0	23.82	23.07	0	23.01	80.09	460.2
120	0	0	0	0	48	0	14	0	14	14	47.97	14	0	280	0.01	0.04	0	0.01	32	0.04	9	0	9	9	31.95	9	14.47	180
121	0.01	0	0	0.01	78	0	0	0	0	0	77.9	0	12.46	0	0	0.03	0	0	25	0.03	8	0	8	8	24.89	8	22.85	160
122	0	0	0	0	78	0	0	0	0	0	77.83	0	13.01	0	0	0.01	0	0	25	0.01	8	0	8	8	24.96	8	57.11	160
123	0.11	0.01	0	0.11	76.23	0	0.01	0	0	0	75.56	0	10.11	0	0.07	0.01	0	0.07	24.09	0	10	0	0	9.99	24.03	9.99	15.68	199.8
124	0	0	0	0	30.91	0	20.68	0	20.68	20	30.87	19.99	0.05	399.8	0	1.37	0	0	1	1.36	23.95	0	23.72	23.28	1	23.14	42.98	462.8
125	0	0	0	0	77.98	0	0	0	0	0	77.58	0	16.76	0	0.45	4.02	0	0.39	19.39	1.36	17.12	0	0	14.08	19.12	14.08	23.31	281.6
126	0.14	0	0	0.1	51.61	0	0	0	0	0	50.79	0	81.06	0	0	1.37	0	0	0.01	1.26	22.53	0	19.1	21.83	0.01	21.63	60.12	432.6
127	0	0	0	0	78	0	0	0	0	0	77.86	0	1.8	0	23.97	0	0	23.97	39	0	0	0	0	0	38.96	0	0.13	0
128	0.01	0	0	0	66.07	0	0	0	0	0	65.07	0	36.55	0	0.02	0.06	0	0	2.17	0.06	24.98	0	24.98	24.96	2.15	24.87	56.78	497.4
129	0	0	0	0	76.98	0	0	0	0	0	76.32	0	25.22	0	0	0.04	0	0	24.96	0.03	8	0	0.02	7.98	24.85	7.98	56.93	159.6
130	0.01	0	0	0	43.62	0	13.96	0	13.96	13.94	42.79	13.86	0.19	277.2	0	0	0	0	24.99	0	8	0	8	7.99	24.82	7.99	25.22	159.8
131	0	0.02	0	0	77.93	0.01	0.01	0	0	0	77.29	0	21.44	0	0	0	0	0	40	0	0	0	0	0	40	0	0	0
132	0.13	0.07	0.21	0.02	22.43	0.06	19.61	0.21	0.45	19.42	22.27	18.77	10.14	375.4	0	0.49	0	0	0	0.48	25.01	0	24.61	24	0	24	45.81	480
133	0	0	0.01	0	22	0	20	0.01	20	20	22	19.97	5.65	399.4	0	0.1	0	0	2.16	0.1	25.01	0	24.91	25	2.16	24.97	70.35	499.4
134	0.08	0	0	0.04	25.46	0	19.86	0	19.86	19.86	25.4	19.65	5.07	393	0.8	3.54	0	0.75	1.05	3.51	22.89	0	22.74	22.37	1	22.3	54.41	446
135	0	0	0	0	22	0	19.99	0	19.99	19.99	22	19.77	10.1	395.4	0	0	0	0	0.99	0	25	0	25	24.98	0.99	24.8	72.02	496
136	0.04	0	0	0.04	45.78	0	11.94	0	11.94	11.94	45.09	11.94	17.34	238.8	0	0.21	0	0	1	0.2	25.01	0	24.84	24.01	1	24	62.66	480
137	0	0	0	0	42	0	14	0	14	13.99	42	13.86	18.25	277.2	0	0	0	0	25	0	8	0	8	8	24.8	8	43.18	160
138	0.03	0	0	0.03	64.57	0	0	0	0	0	63.93	0	48.5	0	0.03	0.01	0	0.02	3.03	0.01	25.01	0	25.01	24.98	3.02	24.98	53.92	499.6
139	0	0	0.01	0	23	0	19.84	0.01	19.84	19.75	23	19	10.02	380	0	1.12	0	0	0	1.12	24.72	0	24.72	23.99	0	23.96	82.65	479.2
140	0	0	0	0	28.93	0	20.45	0	20.44	19.99	28.8	19.93	3.96	398.6	0	0.06	0	0	0	0.06	24.96	0	24.96	23.99	0	23.99	82.36	479.8
141	0	0	0	0	22	0	20	0	20	20	22	19.99	1.53	399.8	0	0	0	0	0.99	0	24.99	0	24.99	24.96	0.99	24.87	84.14	497.4
142	0.01	0	0	0	27.14	0	20.97	0	20.97	20.97	27.12	20.75	2.66	415	0	0.19	0	0	1	0.19	25	0	24.89	24.98	1	24.95	45.02	499
143	0	0	0.09	0	22.03	0	19.76	0.09	19.76	18.99	22.03	18.98	13.4	379.6	0	0.02	0	0	2.24	0.02	25.04	0	25.04	25	2.24	25	66.39	500
144	0.02	0	0	0.02	29.06	0	20.7	0	20.7	20.01	28.89	19.99	0.69	399.8	0	1.8	0	0	0	1.79	24.66	0	24.47	23.99	0	23.93	37.27	478.6
145	0.26	0	0	0.22	50.3	0	0.01	0	0.01	0.01	49.6	0.01	50.81	0.2	0	0.43	0	0	0.99	0.41	25.01	0	24.7	24.87	0.99	24.42	64.16	488.4
146	0.46	0	0	0.46	77.99	0	0	0	0	0	77.1	0	8.16	0	9.68	0	0	8.72	28	0	8.49	0	0	8	27	8	10.04	160
147	0.09	0	0.1	0.01	33.99	0	16.4	0.1	0	16.32	33.57	16.12	2.73	322.4	0.22	0.03	0	0.21	4.09	0.02	22.76	0	0	22.67	4.08	22.46	78.83	449.2
148	0.01	0.03	0	0.01	77.18	0	0.03	0	0	0	76.47	0	18.41	0	0.15	0.3	0	0.14	30.51	0.22	0.1	0	0	0.01	29.91	0.01	31.3	0.2
149	0	0	0	0	77.74	0	0	0	0	0	77.06	0	19.64	0	0.02	0	0	0.02	30.84	0	0	0	0	0	30.75	0	47.08	0
150	0	0	0	0	76.25	0	0	0	0	0	75.65	0	9.57	0	0.07	0	0	0.06	30.87	0	0	0	0	0	29.95	0	45.37	0
151	0	0	0	0	28.1	0	20.84	0	20.84	20.54	28.07	20	0.43	400	0	0.24	0	0	0	0.23	24.7	0	24.67	23.93	0	23.91	67.91	478.2
152	0.08	0	0.06	0.07	21.98	0	19.84	0.05	19.54	19.8	21.97	19.68	3.47	393.6	0	0.5	0	0	0	0.49	24.91	0	24.51	23.93	0	23.92	76.47	478.4
153	0.01	0	0.02	0.01	22	0	20	0.01	20	19.99	22	19.88	1.37	397.6	0	0.02	0	0	3.6	0.02	25	0	25	24.82	3.6	24.24	58.87	484.8
154	0	0	0	0	77.99	0	0	0	0	0	77.59	0	22.54	0	0.14	2.1	0	0.14	14.56	0.1	15.97	0	0	13.93	14.04	13.93	28.74	278.6
155	0.95	0	0	0.94	51	0	0	0	0	0	50.05	0	59.1	0	0	0.23	0	0	0	0.23	24.99	0	24.99	23.99	0	23.99	77.65	479.8
156	0.01	0	0	0	26.73	0	20.39	0	20.39	20.23	26.71	19.47	2.11	389.4	0	0.38	0	0	1	0.38	25	0	25	25	1	24.94	69.37	498.8
157	0.03	0.27	0	0.03	41.67	0.1	12.77	0	1.74	12.57	41.61	12.35	18.28	247	0.09	4.25	0	0.09	26.18	0.93	6.17	0	0.9	2.56	25.9	2.55	17.87	51
158	0.13	0.15	0.01	0.02	26.26	0.13	18.75	0.01	18.53	18.61	26.05	18.37	4.43	367.4	0	0.98	0	0	0	0.95	24.96	0	24.37	24	0	24	53.51	480
159	0.03	0	0	0.03	77.99	0	0	0	0	0	77.81	0	23.97	0	11.05	0	0	11.05	36	0	0	0	0	0	35.82	0	30.44	0
160	0.02	0	0	0.01	27.42	0	20.6	0	20.57	20.1	27.35	19.92	3.67	398.4	0	0.52	0	0	1	0.52	25	0	25	24.99	1	24.9	49.98	498
161	0	0	0	0	77.41	0	0	0	0	0	76.69	0	19.39	0	0.03	0	0	0.02	13.52	0	23.85	0	0.47	23.8	13.03	23.75	39.53	475
162	0.01	0	0.02	0	22	0	19.99	0.02	0	19.99	21.99	19.75	10.83	395	0	0.04	0	0	0	0.04	24.98	0	24.98	24	0	24	54.61	480
163	0.48	0.07	0	0.48	77.35	0.06	0.01	0	0	0	76.93	0	13.36	0	24.01	0	0	23.99	39	0	0	0	0	0	38.96	0	2.71	0
164	1.06	0.02	0.2	0.78	15.45	0.01	15.5	0.2	0	15.32	15.08	15	9.04	300	0	0.72	0	0	0	0.69	22.91	0	19.95	22.83	0	22.69	75.04	453.8
165	0	0	0	0	27.87	0	20.64	0	20.64	20.29	27.8	19.98	1.53	399.6	0	0.04	0	0	0	0.03	24.95	0	24.91	24	0	24	59.74	480
166	0.01	0	0	0	21.98	0	18.67	0	1	17.99	21.96	17.99	10.7	359.8	0	0.81	0	0	1.02	0.81	25.01	0	25.01	24.99	1.02	24.96	74.67	499.2
167	0.01	0	0.01	0	50.62	0	12	0	12	12	49.84	11.99	1.59	239.8	0	0.18	0	0	0	0.18	24.86	0	24.86	24	0	24	68.45	480
168	0.02	0	0	0.02	77.99	0	0	0	0	0	77.88	0	9.69	0	11.02	0	0	11.02	35.98	0	0	0	0	0	35.79	0	33.89	0
169	0.01	0	0	0.01	77.99	0	0	0	0	0	77.78	0	12.21	0	6.02	0	0	6	32.99	0	10.01	0	1.25	10	32.9	9.99	2.39	199.8
170	0.11	0	0	0.07	65.8	0	0	0	0	0	65.66	0	43.1	0	0	0.24	0	0	1	0.24	24.99	0	24.99	24.88	1	24.49	88.93	489.8
171	0	0	0.01	0	22	0	19.97	0.01	19.97	19	22	19	9.32	380	0	0.15	0	0	2.32	0.15	25.26	0	25.26	25	2.32	24.97	53.1	499.4
172	0	0.01	0	0	77.97	0	0.01	0	0.01	0	77.67	0	22.85	0	0	0.46	0	0	24.92	0.12	8.34	0	0	7.98	24.5	7.97	29.37	159.4
173	0.05	0	0	0.05	53.02	0	0	0	0	0	52.96	0	34.39	0	0	0.3	0	0	2.03	0.3	25.12	0	24.67	24.98	2.03	24.96	81.15	499.2
174	0.12	0.01	0	0.12	51.41	0	0.01	0	0.01	0	50.9	0	65.28	0	0	0.64	0	0	0	0.39	16.75	0	1.69	16.01	0	15.97	56.16	319.4
175	0.03	0	0	0.02	77.91	0	0	0	0	0	77.54	0	20.49	0	0.06	0.18	0	0.05	12.05	0.12	15.9	0	0	15.14	12.02	14.96	53.64	299.2
176	0.15	0.01	0	0.11	49.96	0	11.98	0	11.91	11.96	49.38	11.96	0.72	239.2	0.02	0.31	0	0.01	1	0.31	24.87	0	24.46	24.41	0.99	24.05	46.65	481
