# Supplementary material
Source: ML conference proceedings conference paper supplement (https://openreview.net/forum?id=ebe9uW2yQA)
Supplement: supplementary_material [file event_count_hsp.xlsx]

## Sheet: Events
	0-put_onion_on_X_by_agent1	0-put_dish_on_X_by_agent1	0-put_soup_on_X_by_agent1	0-pickup_onion_from_X_by_agent1	0-pickup_onion_from_O_by_agent1	0-pickup_dish_from_X_by_agent1	0-pickup_dish_from_D_by_agent1	0-pickup_soup_from_X_by_agent1	0-USEFUL_DISH_PICKUP_by_agent1	0-SOUP_PICKUP_by_agent1	0-PLACEMENT_IN_POT_by_agent1	0-delivery_by_agent1	0-STAY_by_agent1	0-sparse_r_by_agent1	1-put_onion_on_X_by_agent0	1-put_dish_on_X_by_agent0	1-put_soup_on_X_by_agent0	1-pickup_onion_from_X_by_agent0	1-pickup_onion_from_O_by_agent0	1-pickup_dish_from_X_by_agent0	1-pickup_dish_from_D_by_agent0	1-pickup_soup_from_X_by_agent0	1-USEFUL_DISH_PICKUP_by_agent0	1-SOUP_PICKUP_by_agent0	1-PLACEMENT_IN_POT_by_agent0	1-delivery_by_agent0	1-STAY_by_agent0	1-sparse_r_by_agent0
2	34.56	11.56	0	0.82	34.1	0.58	10.99	0	10.97	0	0	0	76.42	0	0	4.19	0	0	0	5.18	0	0	0	0	0	0	76	0
6	35	11.63	0	0.02	34.99	0.66	11	0	10.89	0	0	0	68.59	0	5.99	0	0	12.32	0	0	0	0	0	0	6	0	63.67	0
8	34.66	11.77	0	0.89	34.06	0.77	11	0	11	0	0	0	57.28	0	1.65	0	0	7.73	0	0	0	0	0	0	6	0	72.04	0
14	33.91	11.08	0	0.11	34.04	0.08	11	0	11	0	0	0	46	0	0	0.14	0	33	0	11.13	0	0	0	10.99	33	10.69	41	213.8
15	34.83	11.11	0	0.06	34.97	0.19	10.92	0	10.89	0	0	0	54.89	0	0	3.47	0	0	0	4.45	0	0	0	0	0	0	70.14	0
19	33.13	11.09	0	0.11	33.35	0.09	11	0	10.97	0	0	0	57.44	0	1.22	0.01	0	33.43	0	9.88	0	0	0	9.86	32	9.82	54.48	196.4
20	33.9	11.08	0	0.01	33.98	0.08	11	0	10.99	0	0	0	45.88	0	0	0.09	0	32.44	0	10.68	0	0	0	10.32	32.41	9.9	38.52	198
21	33.72	16.28	0	0	33.98	5.28	11	0	10.99	0	0	0	43.78	0	2.43	0	0	9.4	0	0	0	0	0	0	6	0	75.24	0
22	33.76	13.11	0	0.05	33.95	2.11	11	0	10.99	0	0	0	35.44	0	0	0.06	0	33	0	11.01	0	0	0	10	33	10	27.78	200
23	47.55	14.08	0	0.02	47.55	0.15	14.26	0	14.13	0	0	0	43.23	0	0.01	0.78	0.01	48.01	0	16.78	0	0.01	0	15.92	48	15.64	13.21	312.8
24	34.91	12.11	0	0.17	34.77	1.21	10.91	0	10.88	0	0	0	69.02	0	0.01	0.86	0.02	32.74	0	11.68	0	0.01	0	10.6	32.73	10.28	44.98	205.6
25	33.65	11.11	0	0.02	33.97	0.11	11	0	10.99	0	0	0	58.42	0	0	3.52	0	0	0	4.51	0	0	0	0	0	0	81.09	0
27	34.12	11.34	0	0.05	34.66	0.34	11	0	11	0	0	0	62.65	0	0.13	0.25	0	33.13	0	11.21	0	0	0	10.88	33	10.69	48	213.8
