# Supplementary material
Source: ML conference proceedings conference paper supplement (https://openreview.net/forum?id=ebe9uW2yQA)
Supplement: supplementary_material [file event_count_hsp.xlsx]

## Sheet: Events
	0-put_onion_on_X_by_agent1	0-put_tomato_on_X_by_agent1	0-put_dish_on_X_by_agent1	0-put_soup_on_X_by_agent1	0-pickup_onion_from_X_by_agent1	0-pickup_onion_from_O_by_agent1	0-pickup_tomato_from_X_by_agent1	0-pickup_tomato_from_T_by_agent1	0-pickup_dish_from_X_by_agent1	0-pickup_dish_from_D_by_agent1	0-pickup_soup_from_X_by_agent1	0-USEFUL_DISH_PICKUP_by_agent1	0-SOUP_PICKUP_by_agent1	0-PLACEMENT_IN_POT_by_agent1	0-viable_placement_by_agent1	0-optimal_placement_by_agent1	0-catastrophic_placement_by_agent1	0-useless_placement_by_agent1	0-potting_onion_by_agent1	0-potting_tomato_by_agent1	0-cook_by_agent1	0-delivery_by_agent1	0-deliver_size_two_order_by_agent1	0-deliver_size_three_order_by_agent1	0-deliver_useless_order_by_agent1	0-STAY_by_agent1	0-MOVEMENT_by_agent1	0-IDLE_MOVEMENT_by_agent1	0-IDLE_INTERACT_by_agent1	1-put_onion_on_X_by_agent0	1-put_tomato_on_X_by_agent0	1-put_dish_on_X_by_agent0	1-put_soup_on_X_by_agent0	1-pickup_onion_from_X_by_agent0	1-pickup_onion_from_O_by_agent0	1-pickup_tomato_from_X_by_agent0	1-pickup_tomato_from_T_by_agent0	1-pickup_dish_from_X_by_agent0	1-pickup_dish_from_D_by_agent0	1-pickup_soup_from_X_by_agent0	1-USEFUL_DISH_PICKUP_by_agent0	1-SOUP_PICKUP_by_agent0	1-PLACEMENT_IN_POT_by_agent0	1-viable_placement_by_agent0	1-optimal_placement_by_agent0	1-catastrophic_placement_by_agent0	1-useless_placement_by_agent0	1-potting_onion_by_agent0	1-potting_tomato_by_agent0
1	0.12	0	0	0	0.12	16.92	0	1.08	0	0	0	0	0	17.99	17.99	17.99	0	0	16.91	1.08	0	0	0	0	0	45.41	318.36	2.3	0	0.14	0	0	0	0.14	16.81	0	1.19	0	0	0	0	0	17	17	17	0	0	15.81	1.19
2	0.01	0	0.96	0	0	12.01	0	0	0.96	11.33	0	11.33	11	12	12	12	0	0	12	0	0	11	1	10	0	37.29	303.04	0.74	0	0	0	0.98	0.01	0	11	0	1	0.98	11.34	0.01	11.34	11	12	12	12	0	0	11	1
3	0	0	0	0	0	28.97	0	1.03	0	0	0	0	0	30	30	30	0	0	28.97	1.03	10	0	0	0	0	21.75	306.63	0.05	0	0.02	0	0	0	0.02	28.96	0	1.04	0	0	0	0	0	30	30	30	0	0	28.96	1.04
6	0.03	0	0.46	0	0.02	12.01	0	0	0.4	11.39	0	11.39	11.01	11.99	11.99	11.99	0	0	11.99	0	0.01	11.01	1.02	9.99	0	45.9	292.84	3.57	0	0.01	0	0.39	0	0.01	12	0	0	0.39	11	0	11	11	11	11	11	0	0	11	0
7	0	0	0	0	0	23.94	0	0.02	0	0	0	0	0	23	23	23	0	0	22.98	0.02	11	0	0	0	0	48.16	288.07	0.11	0.01	0	0	0	0	0	23	0	0	0	0	0	0	0	23	23	23	0	0	23	0
8	0.05	0	0	0	21.02	20.23	0	0.75	0	0	0	0	0	41.24	41.24	41.24	0	0	40.49	0.75	20.24	0	0	0	0	12.6	276.97	0.98	0	0	0	0	0	22	20	0	0	0	0	0	0	0	42	42	42	0	0	42	0
10	1	0	0	0	20.97	21.95	0	0	0	0	0	0	0	40.94	40.94	40.94	0	0	40.94	0	19.97	0	0	0	0	15.45	279.65	0.04	0	0.96	0	0	0	21.07	21.8	0	0	0	0	0	0	0	41	41	41	0	0	41	0
11	11.34	0	0	0	24.33	23.91	0	0	0	0	0	0	0	35.97	35.97	35.97	0	0	35.97	0	11.98	0	0	0	0	21.66	269.94	1.26	0.07	11.33	0	0	0	25.33	22.86	0	0	0	0	0	0	0	36	36	36	0	0	36	0
12	0.11	0	0	0	16.34	16.8	0	0	0	0	0	0	0	32.58	32.58	32.58	0	0	32.58	0	16.02	0	0	0	0	36.71	271.92	0.91	0	0.07	0.02	0	0	16.04	16.69	0.03	0.01	0	0	0	0	0	32.03	32.03	32.03	0	0	32.01	0.02
14	0.01	0	0	0	0.01	24.01	0	0	0	0	0	0	0	24	24	24	0	0	24	0	16	0	0	0	0	32.91	281.18	0.57	0	0	0	0	0.04	0	23.98	0	0	0	0	0.04	0	0	23.97	23.97	23.97	0	0	23.97	0
15	0	0	0.03	0	0	12	0	0	0.03	11	0	11	11	12	12	12	0	0	12	0	0	11	1	10	0	33.89	309	1.3	0	0	0	0.01	0	0	11	0	0	0.01	11	0	11	10.93	11	11	11	0	0	11	0
16	0.01	0	0	0	0.01	22.01	0	0	0	0	0	0	0	21.99	21.99	21.99	0	0	21.99	0	10.99	0	0	0	0	53.93	288.44	0.33	0	0.04	0	0	0	0.03	21.98	0	0.01	0	0	0	0	0	21.94	21.94	21.94	0	0	21.94	0
17	0.02	0	0	0	0.02	22	0	0	0	0	0	0	0	22	22	22	0	0	22	0	11	0	0	0	0	47.96	290.93	0.32	0	0.03	0	0	0	0.04	21.94	0	0	0	0	0	0	0	21.95	21.95	21.95	0	0	21.95	0
19	0.04	0	0.05	0	0.03	12.01	0	0	0.05	11	0	11	11	12	12	12	0	0	12	0	0	11	1	10	0	43.74	299.01	2.1	0	0	0	0.04	0	0	11	0	0	0.04	11	0	11	10.67	11	11	11	0	0	11	0
20	0	0	0	0	0	12	0	0	0	11.01	0	11.01	11	12	12	12	0	0	12	0	0.01	11	1.01	9.99	0	39.76	301.76	2.21	0	0	0	0.01	0	0	11.02	0	0	0.01	11	0	11	10.99	11	11	11	0	0	11	0
21	0.66	0.02	0	0.04	0.72	28.28	0.04	0.01	0	0	0.04	0	0	27.72	27.72	27.72	0	0	27.69	0.03	8.8	0	0	0	0	28.11	300.59	0.59	0	1.39	0	0	0.18	1.37	27.08	0	0	0	0	0.18	0	0	26.54	26.54	26.54	0	0	26.54	0
23	0	0	0.22	0	0	12	0	0	0.22	11	0	11	11	12	12	12	0	0	12	0	0	11	1	10	0	33.9	308.51	12.46	0	0	0	0.18	0	0	11.01	0	0	0.18	10.98	0	10.98	10.93	10.98	10.98	10.98	0	0	10.98	0
25	0.01	0	0	0	0	22.95	0	0	0	0	0	0	0	22.74	22.74	22.74	0	0	22.74	0	11.66	0	0	0	0	45.31	290.17	0.42	0	0	0	0	0	0	22.99	0	0	0	0	0	0	0	22.97	22.97	22.97	0	0	22.97	0
26	0.2	0	0	0	0.2	22.01	0	0	0	0	0	0	0	21.97	21.97	21.97	0	0	21.97	0	10.94	0	0	0	0	35.22	303.01	2.07	0	0.13	0	0.02	0	0.09	21.98	0	0	0.02	0	0	0	0	21.03	21.03	21.03	0	0	21.03	0
27	0.03	0	0	0	0.03	30	0	0.99	0	0	0	0	0	30.93	30.93	30.93	0	0	29.94	0.99	20	0	0	0	0	29.56	284.91	0.62	0	0	0	0	0	0	30.96	0	0	0	0	0	0	0	30	30	30	0	0	30	0
28	0	0	0.05	0	0	12	0	0	0.03	11.78	0	11.78	11	12	12	12	0	0	12	0	0	11	1	10	0	41.18	299.31	2.27	0	0	0	0.06	0	0	11.99	0	0	0.05	11.01	0	11	11	11.04	11.04	11.04	0	0	11.04	0
29	0.85	0	0	0	0.61	29.36	0	0.01	0	0	0	0	0	28.67	28.67	28.67	0	0	28.67	0	9.19	0	0	0	0	26.59	303.24	2.38	0	0.17	0	0	0	0.12	29.33	0	0	0	0	0	0	0	28.89	28.89	28.89	0	0	28.89	0
30	0	0	0	0	0	31	0	0	0	0	0	0	0	30.89	30.89	30.89	0	0	30.89	0	10	0	0	0	0	29.47	292.59	0.01	0	0	0	0	0	0	31	0	0	0	0	0	0	0	30	30	30	0	0	30	0
31	0	0	0	0	0	31	0	0	0	0	0	0	0	30.99	30.99	30.99	0	0	30.99	0	10	0	0	0	0	16.62	309.47	0.03	0	0	0	0	0	0	31	0	0	0	0	0	0	0	30	30	30	0	0	30	0
32	0.01	0	0	0	0	16.98	0	1.01	0	0	0	0	0	17.67	17.67	17.67	0	0	16.66	1.01	0	0	0	0	0	65.2	294.14	0.95	0	0.03	0	0	0	0.03	16.84	0	1.16	0	0	0	0	0	17.83	17.83	17.83	0	0	16.67	1.16
33	0.33	0	0	0	0.33	22.95	0	1.03	0	0	0	0	0	22.99	22.99	22.99	0	0	21.97	1.02	11	0	0	0	0	46.53	286.44	2.3	0	0.28	0.01	0.01	0	0.28	23	0.01	0.03	0.01	0	0	0	0	22.99	22.99	22.99	0	0	22.96	0.03
34	0.04	0	0	0	0.03	23	0	1	0	0	0	0	0	23	23	23	0	0	22	1	11	0	0	0	0	53.98	283.65	1.75	0	0	0	0	0	0	23.76	0	0.07	0	0	0	0	0	23	23	23	0	0	22.93	0.07
35	0	0	0	0	0	22.94	0	1.05	0	0	0	0	0	23	23	23	0	0	21.95	1.05	11	0	0	0	0	44.54	283.47	0.37	0	0	0	0	0	0	22.97	0	0.03	0	0	0	0	0	23	23	23	0	0	22.97	0.03
36	0	0.02	0	0	0	12	0.01	0.01	0	11.11	0	11.11	11	12	12	12	0	0	12	0	0	11	1	10	0	45.02	297.8	1.1	0	0.02	0	0	0	0.01	12.01	0	0	0	11.09	0	11.09	11	11.99	11.99	11.99	0	0	11.99	0
37	0.02	0	0	0	0.01	12.01	0	0	0	11.1	0	11.1	11.03	12	12	12	0	0	12	0	0.05	11	1	10	0	55.06	282.08	0.9	0	0.01	0	0.04	0	0.01	11.89	0	0	0.04	10.99	0	10.99	10.99	11	11	11	0	0	11	0
38	0.04	0.01	0	0.01	0.03	11.96	0	0.01	0	11.04	0	11.04	10.96	11.94	11.94	11.94	0	0	11.94	0	0.02	10.94	1.04	9.9	0	54.87	287.58	2.18	0	0.07	0	0.02	0	0.08	11.92	0	0.03	0.02	11.09	0	11.09	11	11.91	11.91	11.91	0	0	11.88	0.03
39	0.04	0	0	0	0.03	14.69	0	3.32	0	0	0	0	0	17.85	17.85	17.85	0	0	14.55	3.3	0	0	0	0	0	54.63	309.1	1.02	0	0.03	0	0	0	0.03	14.4	0	3.6	0	0	0	0	0	17.91	17.91	17.91	0	0	14.31	3.6
41	0.05	0.01	0	0	0.05	29.54	0.01	1.01	0	0	0	0	0	30.05	30.05	30.05	0	0	29.04	1.01	9.73	0	0	0	0	33.2	292.14	0.31	0	0.01	0	0	0	0	29.62	0	1.03	0	0	0	0	0	29.97	29.97	29.97	0	0	28.94	1.03
50	0.12	0	0	0	0.1	22.23	0	1.07	0	0	0	0	0	22.86	22.86	22.86	0	0	21.79	1.07	10.97	0	0	0	0	49.24	290.13	0.71	0	0.02	0	0	0	0.02	23.08	0	0.08	0	0	0	0	0	22.96	22.96	22.96	0	0	22.88	0.08
52	0.01	0	0	0	0.01	23.21	0	0.01	0	0	0	0	0	22.98	22.98	22.98	0	0	22.97	0.01	11	0	0	0	0	48.87	290.94	0.29	0	0.01	0	0	0	0.01	23.02	0	0	0	0	0	0	0	23	23	23	0	0	23	0
55	0.04	0	0.01	0.01	0.04	17.97	0	0	0.01	8.98	0.01	8.96	8.98	17	17	17	0	0	17	0	8.02	8.96	8.96	0	0	35.55	288.27	0.17	0	0.02	0	0	0	0.02	17.98	0	0	0	8	0	8	8	17.6	17.6	17.6	0	0	17.6	0
57	0.03	0	0.01	0.01	0.03	23.05	0	0	0.01	9.87	0	9.87	9.86	22.87	22.87	22.87	0	0	22.87	0	10.52	9.83	9.76	0.07	0	1.68	311.66	0.1	0	0	0	0	0.01	0	21.99	0	0	0	10.74	0	10.74	10.62	21.98	21.98	21.98	0	0	21.98	0
60	0	0	0.04	0	0	22.78	0	0	0.04	6.94	0	6.94	6.94	22.73	22.73	22.73	0	0	22.73	0	6.94	6.94	0.02	6.92	0	23.07	303.09	2.25	0	0.01	0	0.11	0	0	23.01	0	0	0.11	7	0	7	7	22.9	22.9	22.9	0	0	22.9	0
61	0.06	0	0.02	0	0.05	11.93	0	11.03	0.01	0.01	0	0	0	21.98	21.98	21.98	0	0	10.96	11.02	10.98	0	0	0	0	51.36	288.34	0.63	0	0	0	0	0	0	10.97	0	12.02	0	0	0	0	0	22.94	22.94	22.94	0	0	10.97	11.97
62	0.01	0	0.1	0	0.02	22.8	0	0.01	0.08	0.02	0	0	0	21.9	21.9	21.9	0	0	21.89	0.01	10.95	0	0	0	0	39.16	301.22	2.89	0	0	0	0	0	0	23	0	0	0	0	0	0	0	22.96	22.96	22.96	0	0	22.96	0
63	0.08	0	0.47	0	0.1	11.76	0	0	0.46	10.8	0	10.8	10.78	11.77	11.77	11.77	0	0	11.77	0	0.01	10.78	1	9.78	0	32.16	310.33	0.94	0	0	0	0.72	0	0	10.97	0	0	0.72	10.96	0	10.96	10.86	10.97	10.97	10.97	0	0	10.97	0
64	0.01	0	0	0	0.01	31.97	0	0	0	0	0	0	0	31.12	31.12	31.12	0	0	31.12	0	10	0	0	0	0	15.22	303.45	0.04	0	0.01	0	0	0	0.01	31.86	0	0	0	0	0	0	0	31	31	31	0	0	31	0
65	0.02	0	0	0	0.02	28.96	0	0.02	0	7	0	7	7	27.98	27.98	27.98	0	0	27.96	0.02	7	7	6.99	0	0.01	0.18	314.81	0.06	0	0	0	0	0.02	0	28.93	0	0	0	7	0.01	6.99	6.99	27.98	27.98	27.98	0	0	27.98	0
66	0.02	0	0	0	0.02	30	0	0	0	0	0	0	0	29.86	29.86	29.86	0	0	29.86	0	19.51	0	0	0	0	16.71	299.98	0.32	0	0	0	0	0	0	29.99	0	0	0	0	0	0	0	29.96	29.96	29.96	0	0	29.96	0
67	0	0	0	0	0	29.02	0	1.01	0	0	0	0	0	30	30	30	0	0	29	1	10	0	0	0	0	20.41	305.44	0.06	0	0.01	0	0	0	0.01	28.95	0	1	0	0	0	0	0	29.91	29.91	29.91	0	0	28.91	1
68	11.37	0	0	0	24.36	23.28	0	0	0	0	0	0	0	35.96	35.96	35.96	0	0	35.96	0	11.98	0	0	0	0	16.92	274.85	0.67	0.01	11.28	0.01	0	0	25.27	21.95	0.01	0.01	0	0	0	0	0	35.93	35.93	35.93	0	0	35.92	0.01
70	0.17	0	0	0	0.13	29.94	0	0	0	0	0	0	0	29.45	29.45	29.45	0	0	29.45	0	9.54	0	0	0	0	23.48	305.84	0.23	0	0.41	0	0.01	0.04	0.32	28.92	0	0	0	0.01	0.05	0.01	0	28.59	28.59	28.59	0	0	28.59	0
71	0.01	0	0	0	0.01	18	0	0	0	0	0	0	0	17.44	17.44	17.44	0	0	17.44	0	0	0	0	0	0	81.47	282.53	2.31	0	0.01	0	0	0	0.01	17.99	0	0	0	0	0	0	0	17	17	17	0	0	17	0
72	0.01	0	0.02	0	0	12.01	0	0	0.02	11.08	0	11.08	11	12	12	12	0	0	12	0	0	11	1	10	0	34.24	308.12	1.93	0	0	0	0.02	0	0	12	0	0	0.02	11	0	11	11	11.7	11.7	11.7	0	0	11.7	0
[truncated: 9 more columns]
