# Supplementary material
Source: ML conference proceedings conference paper supplement (https://openreview.net/forum?id=ebe9uW2yQA)
Supplement: supplementary_material [file event_count_hsp.xlsx]

## Sheet: Events
	0-put_onion_on_X_by_agent1	0-put_tomato_on_X_by_agent1	0-put_dish_on_X_by_agent1	0-put_soup_on_X_by_agent1	0-pickup_onion_from_X_by_agent1	0-pickup_onion_from_O_by_agent1	0-pickup_tomato_from_X_by_agent1	0-pickup_tomato_from_T_by_agent1	0-pickup_dish_from_X_by_agent1	0-pickup_dish_from_D_by_agent1	0-pickup_soup_from_X_by_agent1	0-USEFUL_DISH_PICKUP_by_agent1	0-SOUP_PICKUP_by_agent1	0-PLACEMENT_IN_POT_by_agent1	0-viable_placement_by_agent1	0-optimal_placement_by_agent1	0-catastrophic_placement_by_agent1	0-useless_placement_by_agent1	0-potting_onion_by_agent1	0-potting_tomato_by_agent1	0-cook_by_agent1	0-delivery_by_agent1	0-deliver_size_two_order_by_agent1	0-deliver_size_three_order_by_agent1	0-deliver_useless_order_by_agent1	0-STAY_by_agent1	0-MOVEMENT_by_agent1	0-IDLE_MOVEMENT_by_agent1	0-IDLE_INTERACT_by_agent1	1-put_onion_on_X_by_agent0	1-put_tomato_on_X_by_agent0	1-put_dish_on_X_by_agent0	1-put_soup_on_X_by_agent0	1-pickup_onion_from_X_by_agent0	1-pickup_onion_from_O_by_agent0	1-pickup_tomato_from_X_by_agent0	1-pickup_tomato_from_T_by_agent0	1-pickup_dish_from_X_by_agent0	1-pickup_dish_from_D_by_agent0	1-pickup_soup_from_X_by_agent0	1-USEFUL_DISH_PICKUP_by_agent0	1-SOUP_PICKUP_by_agent0	1-PLACEMENT_IN_POT_by_agent0	1-viable_placement_by_agent0	1-optimal_placement_by_agent0	1-catastrophic_placement_by_agent0	1-useless_placement_by_agent0	1-potting_onion_by_agent0	1-potting_tomato_by_agent0
7	0.06	0	0.07	12.93	0.06	13.3	0	0	0.04	13.19	0	12.79	13	13.28	13.28	13.28	0	0	13.28	0	13.28	0	0	0	0	2.11	299.76	0.26	0	0.01	0	0.13	12.87	0.01	13.37	0	0	0.11	13.18	0	12.93	13.02	13.31	13.31	13.31	0	0	13.31	0
9	0.01	0	0	10.02	0.01	10.83	0	0	0	10	0.02	10	10	10	10	10	0	0	10	0	10	0	0	0	0	53.92	283.15	0.18	0	0.11	0	0	9.99	0.11	10.39	0	0	0	10	0	10	9.99	10	10	10	0	0	10	0
10	0.01	0	0.06	0.11	0.01	13.99	0	0	0.06	7	0.11	7	6.99	13.99	13.99	13.99	0	0	13.99	0	9.37	6.01	0.02	5.99	0	13.18	324.26	2.21	0	0.01	0	0.09	0.17	0.01	13.99	0	0	0.09	6.99	0.17	6.99	6.99	13.97	13.97	13.97	0	0	13.97	0
13	0	0	8.18	0.05	0	1.05	0	0	8.17	1.06	0	1.05	0.05	1.05	1.05	1.05	0	0	1.05	0	1.05	0	0	0	0	5.66	373.6	1.7	0	0.02	0	8.92	0.11	0.01	1.11	0	0	8.92	1.1	0.01	1.1	0.1	1.1	1.1	1.1	0	0	1.1	0
15	0.02	0	0.5	0	0.01	13.96	0	0	0.49	6.97	0	6.97	6.91	13.93	13.93	13.93	0	0	13.93	0	6.98	6.02	0.05	5.97	0	24.05	315.74	0.23	0	0.1	0	0.61	0	0.09	13.93	0	0	0.6	6.95	0	6.95	6.92	13.91	13.91	13.91	0	0	13.91	0
16	0.44	0	2.28	12.91	0.36	12.8	0	0	2.19	13.07	0.01	12.97	12.92	12.26	12.26	12.26	0	0	12.26	0	12.18	0	0	0	0	3.69	314.15	0.04	0	0.69	0	2.06	12.85	0.57	12.72	0	0	1.98	13.04	0	12.96	12.89	12.13	12.13	12.13	0	0	12.13	0
17	0.06	0	0	13	0.06	13.99	0	0	0	13	0	13	13	13	13	13	0	0	13	0	13	0	0	0	0	10.56	310.33	0.64	0	0.02	0	0	13	0.02	13.99	0	0	0	13	0	13	13	13	13	13	0	0	13	0
18	0.06	0	0	0.98	0.05	10.95	0	0	0	9.96	0.97	9.96	9.96	10.57	10.57	10.57	0	0	10.57	0	10.38	9.95	9.95	0	0	4.65	331.51	0	0	0.08	0.01	0	0.99	0.07	10.95	0	0.01	0	9.98	0.98	9.98	9.98	10.39	10.39	10.39	0	0	10.39	0
19	0	0	0.24	7.99	0	16.95	0	0	0.24	8	0	8	7.99	15.99	15.99	15.99	0	0	15.99	0	7.99	0	0	0	0	36.92	295.67	0.5	0	0	0	0.15	8	0	16.97	0	0	0.15	8	0	8	8	16	16	16	0	0	16	0
20	0	0	0.41	9.77	0	11	0	0	0.41	9.99	0	9.99	9.88	10.96	10.96	10.96	0	0	10.96	0	10	0	0	0	0	51.28	281.75	0.07	0	0.01	0	0.36	9.94	0.01	11	0	0	0.35	9.99	0	9.94	9.98	10.99	10.99	10.99	0	0	10.99	0
22	0.04	0	0	16.02	0.04	17	0	0	0	16	0.02	16	16	16.86	16.86	16.86	0	0	16.86	0	16.65	0	0	0	0	1.42	299.95	0.02	0	0.03	0	0.01	15.87	0.03	16.85	0	0	0.01	15.87	0.01	15.87	15.87	16.56	16.56	16.56	0	0	16.56	0
23	0.01	0	0	16	0	17.9	0	0	0	16	0	16	16	16.99	16.99	16.99	0	0	16.99	0	15.99	0	0	0	0	0.03	301.08	0.02	0	0	0	0	16	0	17.99	0	0	0	16	0	16	16	17	17	17	0	0	17	0
24	0	0	0.17	15.92	0	16.81	0	0	0.15	15.84	0.11	15.81	15.81	16.57	16.57	16.57	0	0	16.57	0	16.38	0	0	0	0	0.51	301.69	3.66	0	0	0	0.11	15.96	0	17.82	0	0	0.08	16.01	0	15.92	15.97	16.98	16.98	16.98	0	0	16.98	0
25	0	0	0	15.99	0	17	0	0	0	16	0	16	15.99	17	17	17	0	0	17	0	15.99	0	0	0	0	1.52	299.44	0	0	0	0	0	16	0	17	0	0	0	16	0	16	16	17	17	17	0	0	17	0
27	0	1.12	0	0.92	0	0	1.12	21.99	0	0	0.92	0	0	21.8	21.8	21.8	0	0	0	21.8	7	0	0	0	0	34.02	309.82	1.01	0	0	1.03	0	0.79	0.01	0	1.03	21.92	0	0	0.79	0	0	21.82	21.82	21.82	0	0	0.01	21.81
29	0	0.39	0.74	7.87	0	0	0.39	9.62	0.74	6.38	1.98	6.37	6.23	9.28	9.26	9.26	0.02	0	0	9.28	7.16	0	0	0	0	32.28	304.49	20.08	0	0	0.21	0.67	8.36	0.01	0	0.21	9.68	0.66	6.48	2.34	6.44	6.38	9.25	9.25	9.25	0	0	0.01	9.24
30	0	1.83	0	0.16	0	0	1.83	8.09	0	0.11	0.05	0.11	0.11	8.05	8.05	8.05	0	0	0	8.05	0.12	0	0	0	0	69.49	310.07	5.16	0	0	1.93	0	0.06	0	0	1.93	8.03	0	0.06	0	0.06	0.06	7.94	7.94	7.94	0	0	0	7.94
31	0	0	0.04	0	0	0	0	10.01	10.03	0	0	0	9.97	10.01	10.01	10.01	0	0	0	10.01	0	9.16	0	9.16	0	46.47	304.13	1.65	0.01	0	0	0.04	0	0	0	0	10.01	10.02	0	0	0	9.95	10	10	10	0	0	0	10
32	0	0.18	0	0	0	0	0.17	12.08	0	0	0	0	0	11.85	11.85	11.85	0	0	0	11.85	0	0	0	0	0	53.4	322.32	0.68	0	0	0.24	0	0	0	0	0.22	12.15	0	0	0	0	0	11.88	11.88	11.88	0	0	0	11.88
33	0	3.72	0.08	3.07	0	0	3.66	14.69	0.04	2.76	0.36	2.71	2.71	13.71	13.71	13.71	0	0	0	13.71	3.76	0	0	0	0	26.64	324.08	0.14	0	0	4.06	0.08	3.22	0	0	4.01	14.71	0.07	2.77	0.46	2.77	2.76	13.76	13.76	13.76	0	0	0	13.76
34	0	1.92	0	0	0	0	1.91	17.05	0	0	0	0	0	16.97	16.97	16.97	0	0	0	16.97	0	0	0	0	0	51.62	310.52	1.62	0	0	2.13	0	0	0	0	2.13	17.02	0	0	0	0	0	16.9	16.9	16.9	0	0	0	16.9
35	0	1.96	0	4.6	0	0	1.94	13.6	0.01	3.75	0.86	3.75	3.76	13.36	13.36	13.36	0	0	0	13.36	3.82	0	0	0	0	26.74	322.98	0.23	0	0	1.91	0.01	4.57	0	0	1.88	13.59	0.02	3.73	0.86	3.72	3.74	13.26	13.26	13.26	0	0	0	13.26
38	0	1.03	0	6.9	0	0	1.03	14.68	0	5.78	1.13	5.78	5.78	13.74	13.74	13.74	0	0	0	13.74	6.76	0	0	0	0	27.8	314.42	0.45	0	0	0.74	0	7.05	0	0	0.74	14.79	0	5.82	1.23	5.82	5.82	13.82	13.82	13.82	0	0	0	13.82
40	0	0.92	0	0	0	0	0.89	15.13	0	0	0	0	0	14.97	14.97	14.97	0	0	0	14.97	0	0	0	0	0	45.72	320.77	2.11	0	0	0.67	0	0	0	0	0.67	15.1	0	0	0	0	0	14.99	14.99	14.99	0	0	0	14.99
41	0	1.13	0	0	0	0	1.12	13.01	0	0	0	0	0	13	13	13	0	0	0	13	0	0	0	0	0	72.27	299.46	1.82	0	0	1.32	0	0	0	0	1.32	13	0	0	0	0	0	13	13	13	0	0	0	13
43	0	5.09	0	0	0	0	5.09	12.86	0	0	0	0	0	12.45	12.45	12.45	0	0	0	12.45	0	0	0	0	0	47.74	316.77	1.77	0	0	2.82	0	0	0	0	2.82	13	0	0	0	0	0	12.99	12.99	12.99	0	0	0	12.99
44	0	5.13	0	0	0	0	5.12	8.02	0	0	0	0	0	8	8	8	0	0	0	8	0.02	0	0	0	0	76.03	297.64	0.66	0	0	4.99	0	0	0	0	4.99	8	0	0	0	0	0	8	8	8	0	0	0	8
45	0.01	0	0	0	0.01	19.98	0	0.02	0	0	0	0	0	19.66	19.66	19.66	0	0	19.64	0.02	0	0	0	0	0	31.39	328.93	0.26	0	0.02	0	0	0	0.01	20.01	0	0	0	0	0	0	0	19	19	19	0	0	19	0
47	0.01	1.06	0.03	0.61	0	0.01	1.04	13.11	0.03	0.32	0.43	0.32	0.24	12.68	12.68	12.68	0	0	0	12.68	1.14	0	0	0	0	44.54	324.45	7.82	0	0	0.79	0.14	0.71	0	0.02	0.79	13.1	0.13	0.37	0.4	0.36	0.33	12.6	12.6	12.6	0	0	0	12.6
48	0	2.15	0.05	7.95	0.01	0	2.15	14.9	0.04	5.96	2	5.95	5.95	14.81	14.81	14.81	0	0	0.01	14.8	6.95	0	0	0	0	40.84	295.17	0.35	0	0	1.84	0.09	8.3	0	0	1.83	14.83	0.05	5.99	2.36	5.96	5.94	14.61	14.61	14.61	0	0	0	14.61
49	0.13	0	0.25	6.52	0.12	7.97	0	0	0.25	13.76	0.6	13.75	13.1	7.95	7.95	7.95	0	0	7.95	0	6.92	6.89	0	6.89	0	17.87	308.83	0.93	0	0.06	0	0.16	6.46	0.05	7.98	0	0	0.16	13.82	0.54	13.82	13.47	7.97	7.97	7.97	0	0	7.97	0
50	0	5.55	0	0.01	0	0	5.49	18.74	0	0	0.01	0	0	17.82	17.82	17.82	0	0	0	17.82	1.93	0	0	0	0	46.49	302.34	0.87	0	0	5.39	0	0.01	0	0	5.36	18.74	0	0	0.01	0	0	17.8	17.8	17.8	0	0	0	17.8
51	0	2.17	0	6.79	0	0	2.16	14.9	0	5.93	0.86	5.93	5.93	13.94	13.94	13.94	0	0	0	13.94	6.93	0	0	0	0	32.26	305.49	0.1	0	0	0.94	0	6.77	0	0	0.93	14.97	0	5.95	0.82	5.95	5.95	13.96	13.96	13.96	0	0	0	13.96
52	0	1.5	0	0	0	0	1.5	16.95	0	0	0	0	0	16.91	16.91	16.91	0	0	0	16.91	0	0	0	0	0	44.15	318.99	0.29	0	0.11	1.59	0	0	0.1	0.01	1.58	16.95	0	0	0	0	0	16.93	16.93	16.93	0	0	0	16.93
53	0	0.12	0	0.03	0	0	0.12	16	0	0.01	0.02	0.01	0.01	15.86	15.86	15.86	0	0	0	15.86	0.96	0	0	0	0	34.25	332.6	0.06	0	0	0.17	0	0	0	0	0.17	15.98	0	0	0	0	0	15.84	15.84	15.84	0	0	0	15.84
54	0	0.23	0	9.07	0	0	0.23	19.84	0	9.06	0.09	9.06	8.99	19.47	19.47	19.47	0	0	0	19.47	9.96	0	0	0	0	3.43	319.41	0.01	0	0	0.34	0	9.07	0	0	0.34	19.9	0	9.02	0.08	9.02	8.99	19.53	19.53	19.53	0	0	0	19.53
55	0.23	0.02	0.08	0.64	0.12	14.98	0.01	0.12	0.08	7	0.72	7	7	14.36	14.36	14.36	0	0	14.29	0.07	7.01	6.99	0	6.99	0	32.2	305.49	0.09	0	0.45	0.08	0.11	0.67	0.31	14.9	0.05	0.2	0.11	7	0.74	7	7	14.38	14.38	14.38	0	0	14.32	0.06
57	0	0.26	0	0	0	0	0.25	17.26	0	0	0	0	0	16.99	16.99	16.99	0	0	0	16.99	0	0	0	0	0	39.34	324.91	0.49	0	0	0.73	0	0	0	0	0.68	17.37	0	0	0	0	0	17	17	17	0	0	0	17
58	1.38	0	0	0	0.96	4.48	0	0	0	0.04	0	0.04	0.04	3.08	3.08	3.08	0	0	3.08	0	0.04	0.04	0	0.04	0	2.19	98.05	0.24	0	1.3	0	0	0	0.83	4.44	0	0	0	0	0	0	0	3	3	3	0	0	3	0
59	0.05	0	0	13.08	0.05	13.99	0	0	0	13.91	0.08	13.91	13	13.99	13.99	13.99	0	0	13.99	0	13.99	0	0	0	0	1.24	316.6	0.03	0	0.06	0	0	13	0.06	14	0	0	0	13.92	0	13.92	13	14	14	14	0	0	14	0
60	0	1.15	0.02	7.09	0	0	1.14	14.86	0.03	5.99	1.12	5.98	6	14.16	14.16	14.16	0	0	0	14.16	6.97	0	0	0	0	36.99	302.58	0.01	0	0	1.2	0.03	6.94	0	0	1.2	14.82	0.03	5.96	1.05	5.96	5.96	13.94	13.94	13.94	0	0	0	13.94
62	0	0.42	0	0	0	0	0.42	17	0	0	0	0	0	17	17	17	0	0	0	17	0	0	0	0	0	42.99	322.17	0.55	0	0	0.3	0	0	0	0	0.3	17	0	0	0	0	0	17	17	17	0	0	0	17
66	0	1.6	0	0	0	0	1.59	13.01	0	0	0	0	0	12.96	12.96	12.96	0	0	0	12.96	0	0	0	0	0	49.31	321.52	3.24	0	0	1.59	0	0	0	0	1.56	13.03	0	0	0	0	0	12.99	12.99	12.99	0	0	0	12.99
68	0	4.76	0	0	0	0	4.76	13	0	0	0	0	0	13	13	13	0	0	0	13	0	0	0	0	0	69.4	295.02	1.32	0	0	4.78	0	0	0	0	4.77	13.01	0	0	0	0	0	13	13	13	0	0	0	13
70	0.01	0	0	16	0.01	17	0	0	0	16	0	16	16	16.93	16.93	16.93	0	0	16.93	0	16.87	0	0	0	0	1	300.18	0.56	0	0	0	0	16	0	17	0	0	0	16	0	16	16	16.95	16.95	16.95	0	0	16.95	0
71	0.02	0	0	16.01	0.02	17	0	0	0	16	0.01	16	16	16.96	16.96	16.96	0	0	16.96	0	16.86	0	0	0	0	2.26	298.85	0.06	0	0.06	0	0	15.99	0.06	16.97	0	0	0	16	0	15.99	15.99	16.57	16.57	16.57	0	0	16.57	0
[truncated: 9 more columns]
