# Supplementary material
Source: ML conference proceedings conference paper supplement (https://openreview.net/forum?id=ebe9uW2yQA)
Supplement: supplementary_material [file event_count_hsp.xlsx]

## Sheet: Events
	0-put_onion_on_X_by_agent1	0-put_dish_on_X_by_agent1	0-put_soup_on_X_by_agent1	0-pickup_onion_from_X_by_agent1	0-pickup_onion_from_O_by_agent1	0-pickup_dish_from_X_by_agent1	0-pickup_dish_from_D_by_agent1	0-pickup_soup_from_X_by_agent1	0-USEFUL_DISH_PICKUP_by_agent1	0-SOUP_PICKUP_by_agent1	0-PLACEMENT_IN_POT_by_agent1	0-delivery_by_agent1	0-STAY_by_agent1	0-sparse_r_by_agent1	1-put_onion_on_X_by_agent0	1-put_dish_on_X_by_agent0	1-put_soup_on_X_by_agent0	1-pickup_onion_from_X_by_agent0	1-pickup_onion_from_O_by_agent0	1-pickup_dish_from_X_by_agent0	1-pickup_dish_from_D_by_agent0	1-pickup_soup_from_X_by_agent0	1-USEFUL_DISH_PICKUP_by_agent0	1-SOUP_PICKUP_by_agent0	1-PLACEMENT_IN_POT_by_agent0	1-delivery_by_agent0	1-STAY_by_agent0	1-sparse_r_by_agent0
1	0	0.15	0	18	0	0.15	6	0	6	5.98	18	5	9.46	100	0	0.18	0	17	1	0.18	6	0	6	5	18	5	6.41	100
3	0	3.19	0	0	9	3.19	3	0	2	2.99	9	2	13.08	40	0.01	3.15	0.01	0.01	9	3.15	3	0.01	3	3	9	2	12.64	40
5	0.02	0.01	0.02	18.01	0	0	5.99	0.02	5.94	5.93	17.98	5	6.88	100	0.04	0.02	0	17.04	1	0.01	5.94	0	5.92	5	17.98	5	5.56	100
6	0	0.13	0	17.93	0	0.13	5	0	5	5	16.98	5	8.66	100	0.01	0.18	0	15.89	1	0.17	4.97	0	4.97	4.96	16.86	4.96	8.99	99.2
7	3.99	0	0.01	3.97	11.85	0	0	2.98	0	0	10.92	2.97	16.5	59.4	4.01	0.05	0.07	4	11.96	0.05	0	3.07	0	0	11.93	2.99	16.68	59.8
8	0	0.05	0	17	0	0.05	5	0	5	5	16.98	5	9.07	100	0	0.04	0	15.65	1	0.04	5	0	4.99	4.99	15.99	4.99	7.69	99.8
9	0.07	0.49	0.86	0.05	8.91	0.27	2.58	0.64	2.25	2.06	8.64	1.77	8.58	35.4	0.67	0.63	0.55	0.62	5.61	1.6	0.17	0.37	0.14	1.09	5.36	0.82	29.61	16.4
10	10.98	0.02	0	0.04	16.98	0.02	4.98	0	4.98	4.97	6.02	4.92	17.37	98.4	12.06	0.07	0	0.08	18.43	0.06	5.01	0	4.99	5	6	5	18.12	100
11	3.7	0.63	0.01	3.48	11.23	3.63	0	0.01	0	3	10.47	3	13.11	60	3.97	0.6	0	3.89	11.76	3.71	0	0	0	3	11.26	3	13.16	60
12	2.37	0.02	0	0.36	7.01	0.02	5	0	5	4.99	5	4.99	40.91	99.8	3.31	0.04	0.02	0.3	8.72	0.03	4.97	0.02	4.97	4.96	4.96	4.96	45.05	99.2
13	3.05	1.19	0	2.89	11.11	4.2	0	0	0	3	10.36	3	15.12	60	2.85	1.54	0	2.82	11.7	4.59	0	0	0	3	11.15	3	11.42	60
14	3.97	0.2	0	3.7	11.39	3.2	0	0	0	3	10.53	3	18.58	60	3.76	0.51	0	3.59	11.9	3.61	0	0	0	3.01	11.27	3	16.69	60
15	0.06	0.62	0	18.05	0	0.62	5.99	0	5.99	5.97	17.99	5	12.99	100	0.03	0.59	0.01	17.03	1	0.56	5.97	0.01	5.97	5	18	5	11.99	100
16	2.43	1.07	0	2.43	6	1.07	5	0	5	5	6	5	29.85	100	2.11	4.21	0	2.11	6	4.21	5	0	4.98	5	5	5	33	100
17	0.04	0.06	0	18.01	0	0.04	5.99	0	5.86	5.91	17.95	5	12.25	100	0.95	0.04	0	14.75	3.03	0.04	5.01	0	4.99	4.99	16.42	4.99	9.58	99.8
18	0.91	1.02	0	0.91	6	1.02	5	0	5	5	6	5	38.8	100	2.03	1.12	0	1.03	6.94	1.08	5.92	0	5.92	4.94	5.94	4.94	38.69	98.8
19	0	0.04	0	18	0	0.04	6	0	6	5.99	18	5	5.24	100	0.02	0.02	0	17.02	1	0.02	6	0	6	5	18	5	4.14	100
22	0.02	1.05	0.01	2.03	8.97	0.07	0.99	3	0.98	0.01	10.98	3	13.58	60	0	0	0	0	11	0	0	3	0	0	10	3	11.77	60
23	3.94	0.02	0	3.94	12	0.02	3.93	0	3.93	3.49	12	3	10.2	60	3.83	0.03	0	3.79	12	0.03	3.43	0	3.41	3.16	11.81	3.01	8.63	60.2
24	0	0.42	0	18	0	0.42	6	0	6	5.98	18	5	7.05	100	0	0.4	0	17	1	0.4	6	0	6	5	18	5	7.23	100
25	9.99	0.1	0.01	4.88	15.44	0.1	4.99	0.01	4.99	4.98	10.01	4.85	6.85	97	11.35	0.09	0.01	4.92	17.21	0.09	4.98	0.01	4.98	4.95	10.03	4.94	7.51	98.8
26	0	0.01	0	17.91	0	0.01	5	0	5	5	17	5	5.84	100	0	0	0	16	1	0	5	0	5	5	17	5	5.73	100
29	0.15	0.96	0.01	0.15	5.97	0.96	4.98	0.01	4.97	4.97	5.94	4.97	36.39	99.4	1.2	1.18	0	0.2	6.99	1.12	5.97	0	5.93	5	5.99	5	36.84	100
30	0.11	0.03	0	0.09	11	0.03	2.99	0	2.99	2.99	9.99	2.99	3.48	59.8	0.02	0.01	0	0.02	11	0.01	3	0	3	3	11	3	3.16	60
32	0.06	5.77	0	16	0	5.77	4.98	0	4.95	4.98	15.75	4.98	20	99.6	0	5.09	0	14.97	1	5.08	5	0	5	4.99	15	4.99	19.79	99.8
33	2.78	0.65	0	2.49	11.15	3.65	0	0	0	2.99	10.19	2.99	15.08	59.8	3.1	0.79	0	2.96	11.68	3.91	0	0	0	2.98	11.07	2.98	14.21	59.6
35	3.97	0.17	0	3.89	11.94	0.17	3	0	2.99	3	10.99	3	1.79	60	4.04	0.09	0	4.03	11.99	0.09	3	0	3	3	11.87	3	1.71	60
38	3.38	0.39	0	3.23	11.11	3.4	0	0	0	3	10.37	3	18.04	60	3.62	0.55	0	3.58	11.69	3.64	0	0	0	3	11.12	3	14.7	60
39	0.01	0.15	0	0.01	10.99	0.15	3	0	3	3	10	3	3.45	60	0	0.09	0	0	11	0.08	3.01	0	2.98	3	11	3	3.63	60
40	3.12	0.64	0	2.92	11.15	3.64	0	0	0	3	10.3	3	12.66	60	3.34	0.65	0	3.24	11.82	3.72	0	0	0	3	11.07	3	10.38	60
41	3.88	0.9	0	3.54	11.58	3.9	0	0	0	3	10.6	3	17.65	60	3.84	1.24	0	3.79	11.99	4.59	0	0	0	3.01	11.62	3	16.1	60
42	3.78	0	0.38	3.71	11.93	0	0	3.37	0	0	11.56	2.98	19.46	59.6	3.89	0	0	3.89	12	0	0	3.01	0	0	11.99	3	22.78	60
43	0	0.04	0	17.96	0	0.03	5.98	0	5.92	5.95	17.95	4.99	11.1	99.8	0	0	0	17	1	0	5.9	0	5.9	5	18	5	10.48	100
44	0	0.05	0.04	0	10.99	3.05	0	0.04	0	3	10	3	7.21	60	0	0.06	0	0	11	3.06	0	0	0	3	11	3	7.49	60
45	0	0.01	0	18	0	0.01	6	0	6	5.98	18	5	11.23	100	0.07	0	0	16.9	1	0	5.91	0	5.91	4.95	17.81	4.95	8.99	99
46	3.19	3.07	0.01	2.43	11.66	3.02	3.16	0.01	3.07	2.99	10.55	2.99	7.66	59.8	3.69	0.09	0	3.69	12	3.99	0	0	0	3.64	11.97	3	6.39	60
49	3.88	0.2	0.01	3.66	11.89	0.2	3	0.01	3	3	10.95	3	2.56	60	4.19	0.16	0	4.16	11.93	3.1	0.03	0	0.03	2.97	11.73	2.97	11.05	59.4
50	0	1.16	0	17.91	0	1.16	5.97	0	5.97	5.95	17.91	4.97	4.19	99.4	0	0.13	0	17	1	0.12	5.99	0	5.99	5	18	5	2.86	100
51	0	0	0	18	0	0	6	0	6	6	18	5	13.52	100	0.16	0	0.01	17.12	1.01	0	5.6	0.01	5.6	5	17.91	5	13.14	100
53	0	0.43	0	18	0	0.43	6	0	6	5.96	18	5	14.43	100	0.01	0.36	0	16.84	0.99	0.35	5.88	0	5.88	4.95	17.82	4.95	13.9	99
54	2.44	0.37	0	2.35	10.53	3.38	0	0	0	2.99	9.89	2.99	19.15	59.8	3.38	0.43	0	3.28	11.52	3.45	0	0	0	3	10.85	3	17.29	60
56	0.09	0.92	0	15.77	0	0.92	4.92	0	4.85	4.89	15.22	4.73	9.8	94.6	0.05	0.43	0	15.12	1	0.43	5	0	5	5	15.86	4.98	5.79	99.6
58	0	0.13	0.03	18	0	0.12	6.01	0.03	5.96	5.91	18	5	10.26	100	0.17	0.16	0	17.13	1.04	0.16	5.28	0	5.28	5	17.99	5	10.61	100
59	4.74	0.01	0	4.74	5.81	0.01	4.81	0	4.81	4.81	5.81	4.81	38.46	96.2	5.71	0.02	0	4.71	6.94	0.02	5.01	0	5.01	4.94	5.93	4.94	39.66	98.8
60	0	0.07	0	18	0	0.07	6	0	6	6	18	5	11.99	100	0	0.04	0	16.83	1	0.04	5.94	0	5.94	4.95	17.83	4.95	10.67	99
62	9.97	0.09	0	5	15.21	0.06	4.92	0	4.89	4.87	10.02	4.75	7.77	95	9.07	0.08	0	5.03	15.02	0.08	4.87	0	4.87	4.52	10.92	4.03	8.62	80.6
63	0	0.04	0	0	11	0.04	3	0	3	3	10	3	1.37	60	0	0.19	0	0	11	0.18	3.01	0	3	3	10.99	3	2.09	60
64	3.96	0.1	0.01	3.96	12	0.09	3.87	0.01	3.87	3	11.98	3	2.03	60	3.95	0.15	0	3.95	12	0.15	3.99	0	3.99	3.9	12	3	2.43	60
65	0.02	1.53	0	17.94	0	1.53	5.96	0	5.96	5.85	17.91	4.98	5.18	99.6	0.01	1.57	0	17.01	1	1.53	5.99	0	5.99	5	18	5	4.81	100
66	0	0.93	0	18	0	0.93	6	0	6	5.99	18	5	11.43	100	0.01	0.56	0	17	1.01	0.49	6	0	6	5	18	5	12.21	100
67	0	0.96	0	0	6	0.96	5	0	5	5	6	5	40.14	100	1.04	1.12	0	0.04	7	1.09	5.99	0	5.99	5	6	5	42.11	100
68	0	0.08	0	17.95	0	0.07	5.01	0	4.97	5	17	5	5.93	100	0.1	0.17	0	16.1	1	0.17	5	0	5	5	16.95	5	6.42	100
69	3.96	0.02	0.01	3.86	12	0.01	3.01	0.01	2.99	3	10.93	3	3.55	60	4.9	0.03	0	4.9	12	0.03	3.87	0	3.87	3.76	11.99	3	4.67	60
71	2.56	0.39	0	2.49	9.85	3.38	0	0	0	2.96	9.22	2.86	22.65	57.2	2.39	0.42	0	2.28	10.38	3.43	0	0	0	2.98	9.82	2.96	20.3	59.2
74	2.92	0.69	0	2.74	10.91	3.7	0	0	0	3	10.19	3	15.64	60	2.86	0.97	0	2.81	11.62	3.97	0	0	0	3	10.98	3	14.15	60
75	0.01	0	0	18.01	0	0	6	0	6	5.88	18	5	1.57	100	0.4	0	0.02	17.31	1.01	0	5.59	0.02	5.59	5	17.85	5	3.46	100
76	3.94	0.19	0	3.68	11.53	3.19	0	0	0	3	10.66	3	18.18	60	3.81	0.53	0	3.77	11.88	3.67	0	0	0	3	11.47	3	17.2	60
77	0.03	0.02	0	0.01	10.65	0.02	0	2.94	0	0	9.86	2.94	24.08	58.8	0	0.01	0	0	10.92	0.01	0	2.97	0	0	10.51	2.97	23.66	59.4
80	0.19	2.31	0	0.17	6.02	2.31	5	0	5	5	5.95	5	44.28	100	1.31	2.49	0	0.31	6.97	2.49	4.99	0	4.99	4.98	5.91	4.98	43.51	99.6
81	4.12	0.01	0	4.12	11.99	0	3.25	0	3.22	3	11.93	3	6.73	60	4.09	0.01	0	4.09	12	0.01	3.95	0	3.95	3.9	11.99	3	6.82	60
83	0	6.56	0.05	16.97	0	5.58	5.99	0.05	5.77	5	16.12	5	13.68	100	0	5.44	0.03	15	1	5.44	5.77	0.03	5.77	5	15.99	5	12.15	100
84	1.31	1.16	0.01	1.31	6	1.16	5	0.01	5	5	5.98	5	37.9	100	2.35	1.46	0.23	1.36	6.94	1.43	5.89	0.23	5.89	4.96	5.91	4.95	42.02	99
85	0.05	0.16	0	0.05	10.31	3.16	0	0	0	3	9.99	3	11.04	60	0.05	0.28	0	0.05	10.99	3.28	0	0	0	3	10.9	3	8.93	60
87	3.39	0.93	0	3.26	11.39	3.94	0	0	0	3	10.7	3	19.68	60	3.41	1.81	0.01	3.38	11.87	5.15	0	0.01	0	3.02	11.49	3	19.3	60
88	0	0.01	0	17.93	0	0.01	5	0	5	5	17	5	8.27	100	0	0.02	0	15.99	1	0.02	5	0	5	5	16.97	5	8.81	100
89	0	0.6	2.22	0	10.87	3.57	0	2.2	0	2.97	9.89	2.95	8.16	59	0	0.61	0	0	11	3.61	0	0	0	3	10.99	3	8.46	60
91	0.07	0.93	0.02	0.07	10.19	3.93	0	0.02	0	3	9.96	3	11.72	60	0.1	1.6	0.01	0.1	11	4.6	0	0.01	0	3	10.75	3	9.59	60
92	3.89	0.03	0	3.88	12	0.03	3.89	0	3.89	3.61	11.99	3	6.86	60	3.97	0.04	0	3.97	12	0.04	4	0	4	3.97	12	3.97	6.89	79.4
94	2.66	1.06	0	2.54	11.04	4.06	0	0	0	3	10.51	3	11.47	60	2.68	1.22	0	2.63	11.69	4.23	0	0	0	3	11.06	3	9.73	60
95	1.16	0.1	0	0.97	11.41	0.1	3.03	0	3.03	3	10.75	3	4.34	60	1.06	0.12	0	0.96	11.74	0.12	3.14	0	3.14	3.03	11.29	3	4.76	60
96	4.03	0.53	0	3.83	11.53	3.53	0	0	0	3	10.8	3	16.26	60	3.97	0.86	0	3.96	11.93	4.31	0	0	0	3.02	11.65	3	15.55	60
98	3.5	4.66	0	3.23	10.18	4.27	3.66	0	3.66	2.95	9.84	2.95	13.84	59	4.41	2.55	0	4.39	11.81	6.21	0.03	0	0.03	3.17	11.68	2.96	15.01	59.2
100	0.01	0.38	0	18.01	0	0.37	6.01	0	5.99	5.95	18	5	15.6	100	0.03	0.48	0	17.03	1	0.48	6	0	6	5	18	5	12.89	100
102	0	0.05	0	18	0	0.05	6	0	6	5.91	18	5	7.4	100	0.05	0.03	0	17.05	1	0.03	5.96	0	5.96	5	17.99	5	5.53	100
103	3.83	0.16	0.01	3.78	11.99	0.16	3.46	0.01	3.46	3	11.71	3	1.98	60	3.86	0.04	0	3.86	12	0.04	3.88	0	3.88	3.31	11.97	3	3.11	60
104	4.16	0.12	0	4.16	11.97	0.11	3.5	0	3.49	2.99	11.97	2.99	3.33	59.8	4.04	0.04	0	4.02	12	0.03	3.8	0	3.79	3.2	11.96	3	4.04	60
105	3.89	0.69	0	3.75	11.53	3.69	0	0	0	3	10.78	3	15.67	60	3.96	1.04	0	3.94	11.99	4.6	0	0	0	3.08	11.7	3	15.17	60
106	3.27	0.34	0	3.15	10.71	3.34	0	0	0	3	10.01	3	18.13	60	3.37	0.33	0.01	3.29	11.55	3.4	0	0	0	3	10.97	2.99	14.45	59.8
107	3.62	0.74	0	3.34	11.44	3.74	0	0	0	3	10.59	3	14	60	3.64	1.13	0	3.58	11.83	4.38	0	0	0	2.99	11.46	2.99	14	59.8
108	3.24	1.06	0.01	3.11	10.88	4.06	0	0.01	0	3	10.11	3	17.01	60	3.37	1.37	0	3.3	11.5	4.39	0	0	0	3	10.9	3	15.97	60
109	3.59	0.06	0	3.39	11.58	3.06	0	0	0	3	10.84	3	14.06	60	3.81	0.22	0.01	3.78	11.99	3.64	0	0.01	0	3.09	11.69	3	15.72	60
110	0.74	4.32	3.97	13.9	0	3.73	4.25	3.71	3.57	3.62	12.89	3.28	20.84	65.6	1.31	3.39	3.16	11.98	0.27	3.05	3.4	2.85	3.33	2.99	10.69	2.51	20.42	50.2
113	0.28	7.54	5.8	16.38	0	7.16	5.37	1.06	5.36	4.82	15.87	0.02	22	0.4	3.08	6.82	4.21	15.66	1	6.31	4.48	0.46	4.45	3.87	13.33	0.02	26.89	0.4
115	0.16	6.43	0.42	15.55	0	6.21	5.13	0.42	4.06	4.76	15.07	4.68	22.88	93.6	0.44	6.57	1.25	14.22	0.95	6.34	4.86	1.23	4.32	4.49	14.33	4.34	24.75	86.8
117	0.11	6.93	0	17.21	0	5.97	5.97	0	4.96	5	16.67	5	9.08	100	0.02	6.14	0.02	15.1	1	5.88	5.64	0.02	5.63	4.99	15.9	4.98	9.29	99.6
121	0	0	0.03	0	10	0	3	0.03	3	3	9.93	3	0.18	60	0	0	0.01	0	10.86	0	3	0.01	3	3	10	3	0.16	60
122	12	0	0	0	18	0	0	5	0	0	5	5	48.82	100	12.01	0	0	0.01	18	0	0	5	0	0	5.99	5	50.8	100
124	11.08	0	0	0.06	16.21	0	0	5	0	0	5	5	51.35	100	12.1	0	0	0.13	17.95	0	0	4.98	0	0	4.99	4.98	51.04	99.6
125	0	4.31	0	0	0	0.31	4.01	0	3.99	0	0	0	96.98	0	0	4.24	0	0	0	0.24	4	0	3.99	0	0	0	92.46	0
126	0.01	0.16	0.01	0	10.77	3.16	0	0.01	0	3	10	3	6.32	60	0.01	0.23	0.01	0.01	11	3.23	0	0.01	0	3	10.88	3	5.93	60
127	3.51	0.24	0	3.33	11.05	3.24	0	0	0	3	10.22	3	22.04	60	3.32	0.27	0	3.25	11.49	3.32	0	0	0	3	10.87	3	20.57	60
128	3.52	0.83	0	3.36	11	3.84	0	0	0	3	10.3	3	15.98	60	3.48	1.14	0	3.42	11.53	4.17	0	0	0	3	10.88	3	14.48	60
131	12	0	0	0.01	17.99	0	0	5	0	0	6	5	43.99	100	12.03	0	0	0.03	18.77	0	0	6	0	0	6	6	41.68	120
132	1.45	0.28	0	3.44	4.93	0.27	4.96	0	4.95	4.94	6.78	4.93	29.19	98.6	1.42	0	0.01	2.41	5.93	0	4.97	0.01	4.97	4.96	5.99	4.95	29.03	99
134	0.85	0.22	0	0.85	6	0.22	5	0	5	5	5	5	36.86	100	1.89	0.26	0	0.89	6.98	0.26	5	0	5	5	5	4.99	37.29	99.8
135	0.1	0.08	0.02	0.1	6	0.08	5	0	5	5	5	4.98	32.94	99.6	0.19	0.11	0	0.18	5.9	0.11	5	0	5	5	5	5	35.13	100
136	11.01	0	0	0.02	17	0	0	5	0	0	6.01	5	36.56	100	12.02	0	0.06	0.03	18.44	0	0	6.04	0	0	5.99	5.97	32.98	119.4
137	0	0.02	0.37	17.98	0	0.02	5.97	0.36	5.97	5.93	17.97	4.99	8.25	99.8	0.01	0.05	0.01	17.01	1	0.04	5.91	0.01	5.88	5	17.99	5	7.55	100
138	1.25	0	0	0.23	7.02	0	5	0	5	5	5	5	40.3	100	2.52	0	0.01	0.51	7.97	0	4.99	0.01	4.99	4.98	4.99	4.98	42.54	99.6
139	0	0.01	0	17.86	0	0.01	4.99	0	4.99	4.99	16.95	4.99	2.29	99.8	0.01	0	0	16.01	1	0	5	0	5	5	16.97	5	2.58	100
141	6.01	0.89	0.01	2.13	8.78	0.87	4.58	0.01	4.54	4.27	4.83	3.9	41.18	78	7.15	0.3	0.02	2.23	9.86	0.26	4.73	0.02	4.68	4.55	4.86	4.06	43.3	81.2
142	0.05	1.05	0	0.05	4.09	0.05	6	0	1.01	5	4	5	38.04	100	0.06	1.07	0.04	0.05	5.99	0.07	5.99	0.04	1.05	4.99	4.99	4.99	33.07	99.8
143	4.03	0.81	0	4.01	12.01	4.4	0	0	0	3	11.97	3	11.48	60	3.97	0.75	0	3.97	12	4.72	0	0	0	3.95	12	3	13.05	60
