# Supplementary material
Source: ML conference proceedings conference paper supplement (https://openreview.net/forum?id=ebe9uW2yQA)
Supplement: supplementary_material [file event_count_hsp.xlsx]

## Sheet: Events
	0-put_onion_on_X_by_agent1	0-put_tomato_on_X_by_agent1	0-put_dish_on_X_by_agent1	0-put_soup_on_X_by_agent1	0-pickup_onion_from_X_by_agent1	0-pickup_onion_from_O_by_agent1	0-pickup_tomato_from_X_by_agent1	0-pickup_tomato_from_T_by_agent1	0-pickup_dish_from_X_by_agent1	0-pickup_dish_from_D_by_agent1	0-pickup_soup_from_X_by_agent1	0-USEFUL_DISH_PICKUP_by_agent1	0-SOUP_PICKUP_by_agent1	0-PLACEMENT_IN_POT_by_agent1	0-viable_placement_by_agent1	0-optimal_placement_by_agent1	0-catastrophic_placement_by_agent1	0-useless_placement_by_agent1	0-potting_onion_by_agent1	0-potting_tomato_by_agent1	0-cook_by_agent1	0-delivery_by_agent1	0-deliver_size_two_order_by_agent1	0-deliver_size_three_order_by_agent1	0-deliver_useless_order_by_agent1	0-STAY_by_agent1	0-MOVEMENT_by_agent1	0-IDLE_MOVEMENT_by_agent1	0-IDLE_INTERACT_by_agent1	1-put_onion_on_X_by_agent0	1-put_tomato_on_X_by_agent0	1-put_dish_on_X_by_agent0	1-put_soup_on_X_by_agent0	1-pickup_onion_from_X_by_agent0	1-pickup_onion_from_O_by_agent0	1-pickup_tomato_from_X_by_agent0	1-pickup_tomato_from_T_by_agent0	1-pickup_dish_from_X_by_agent0	1-pickup_dish_from_D_by_agent0	1-pickup_soup_from_X_by_agent0	1-USEFUL_DISH_PICKUP_by_agent0	1-SOUP_PICKUP_by_agent0	1-PLACEMENT_IN_POT_by_agent0	1-viable_placement_by_agent0	1-optimal_placement_by_agent0	1-catastrophic_placement_by_agent0	1-useless_placement_by_agent0	1-potting_onion_by_agent0	1-potting_tomato_by_agent0
1	33.76	0.02	15.96	0	0.38	33.56	0	0.03	0.19	16.03	0	15.99	0	0	0	0	0	0	0	0	0	0	0	0	0	45.28	251.3	0	3.49	0	0.02	0.99	0	20.24	0	0.01	11.03	11.21	0	0	0	10.1	30.99	30.99	30.99	0	0	19.97	11.02
3	32.86	0.05	15.99	0	0.14	33.17	0.03	0.02	0.09	15.92	0	15.89	0	0	0	0	0	0	0	0	0	0	0	0	0	73.49	221.67	0	6.57	0	0	0.03	0.01	10.01	0	0	19.99	9.04	0	0	0	9	30	30	30	0	0	10.01	19.99
4	31.28	0	10.41	0	1.08	30.43	0	0	0.91	9.77	0	9.71	0	0	0	0	0	0	0	0	0	0	0	0	0	75.01	236.65	0	4.46	0.06	0.07	0.1	0.01	19.53	0	0.04	10.21	9.16	0	0	0	9.03	29.59	29.58	29.58	0.01	0	19.42	10.17
6	31.98	0	11.78	0	0.05	32.53	0	0	1.78	10	0	10	0	0	0	0	0	0	0	0	0	0	0	0	0	69.97	237.64	0	4.27	0.04	0	0.02	0	17.05	0	0	15.62	15.7	0	0	0	15.62	32.41	32.41	32.41	0	0	16.89	15.52
34	31.45	0	10.64	0	0.1	31.71	0	0	0.68	9.96	0	9.95	0	0	0	0	0	0	0	0	0	0	0	0	0	73.61	235	0	6.85	0	0	0.74	0	21.98	0	0	11.01	10.84	0	0	0	10.02	32.98	32.98	32.98	0	0	21.98	11
35	32	0	10.71	0	0	32.97	0	0	0.71	10	0	10	0	0	0	0	0	0	0	0	0	0	0	0	0	84.09	220.8	0	8.72	0.02	2.41	1	4.51	0.08	0	2.42	10.13	4.61	0	1.38	0	3.41	10.05	9.51	9.51	0.54	0	0.04	10.01
36	33.31	0	10.22	0	0.36	32.97	0	0	0.2	10.95	0	10.95	0	0	0	0	0	0	0	0	0	0	0	0	0	57.86	246.49	0	7.64	0.02	0	0.62	0	10.03	0	0	20	10.59	0	0	0	9.82	30	30	30	0	0	10	20
37	33.26	0.03	10.53	0	0.28	33.01	0.02	0.01	0.51	10.7	0	10.7	0	0	0	0	0	0	0	0	0	0	0	0	0	53.12	254.67	0	3.86	0.01	0	0.73	0	21.98	0	0	11	10.77	0	0	0	10.01	32.95	32.95	32.95	0	0	21.95	11
38	31.95	0	10.88	0	0.04	32.19	0	0	0.88	10	0	10	0	0	0	0	0	0	0	0	0	0	0	0	0	75.61	225.27	0	13.18	0	0	0.04	0	22	0	0	11	10.04	0	0	0	10	33	33	33	0	0	22	11
40	35.44	0	17	0	0.08	35.81	0	0	0.01	16.99	0	16.99	0	0	0	0	0	0	0	0	0	0	0	0	0	43.35	242.38	0	8.94	0.01	0	0.38	0	10.84	0	0.02	19.09	10.35	0	0	0	9.04	29.93	29.93	29.93	0	0	10.83	19.1
41	34.08	0	16.04	0	0.08	34	0	0	0.04	16.75	0	16.75	0	0	0	0	0	0	0	0	0	0	0	0	0	69.98	225.27	0	3.76	0	0	0.08	0.02	21.39	0	0	10.85	10.06	0	0	0	9.98	31.86	31.86	31.86	0	0	21.08	10.78
43	35.7	0	17	0	0.07	35.94	0	0	0.02	16.99	0	16.99	0	0	0	0	0	0	0	0	0	0	0	0	0	55.76	235.59	0	2.93	0.2	0	0.22	0.06	21.92	0	0	10.79	10.17	0	0.05	0	9.88	32.47	32.47	32.47	0	0	21.69	10.78
44	33.58	0.04	16.29	0	0.39	33.5	0.02	0.02	0.29	16.05	0	16.03	0	0	0	0	0	0	0	0	0	0	0	0	0	65.31	230.61	0	3.9	0	0	0.1	0	21.98	0	0	11.01	10.18	0	0	0	10	32.97	32.97	32.97	0	0	21.97	11
61	13	0.04	13.91	0	2.95	10.06	0.02	0.02	3.98	9.99	0	9.5	0	0	0	0	0	0	0	0	0	0	0	0	0	77.22	268.46	0	0.35	0	0	0.22	0.06	20.15	0	0	10.97	10.22	0	0.05	0	9.99	30.79	30.79	30.79	0	0	20	10.79
63	18.57	0	16.44	0	1.64	16.97	0	0	0.28	16.69	0	16.64	0	0	0	0	0	0	0	0	0	0	0	0	0	70.14	258.41	0	0.86	0.04	0.01	0.42	0.28	11.52	0	0.02	18.54	10.2	0	0.27	0	9.55	29.85	29.84	29.84	0.01	0	11.42	18.43
67	20.44	0.05	13.55	0	0.9	19.89	0.01	0.04	3.79	9.91	0	9.67	0	0	0	0	0	0	0	0	0	0	0	0	0	76.87	252.66	0	1.89	0	0.07	0.74	0	9.99	0	0.06	19.99	9.93	0	0	0	9.01	29.97	29.97	29.97	0	0	9.99	19.98
[truncated: 9 more columns]
