# Supplementary material
Source: ML conference proceedings conference paper supplement (https://openreview.net/forum?id=ebe9uW2yQA)
Supplement: supplementary_material [file event_count_hsp.xlsx]

## Sheet: Events
	0-put_onion_on_X_by_agent1	0-put_dish_on_X_by_agent1	0-put_soup_on_X_by_agent1	0-pickup_onion_from_X_by_agent1	0-pickup_onion_from_O_by_agent1	0-pickup_dish_from_X_by_agent1	0-pickup_dish_from_D_by_agent1	0-pickup_soup_from_X_by_agent1	0-USEFUL_DISH_PICKUP_by_agent1	0-SOUP_PICKUP_by_agent1	0-PLACEMENT_IN_POT_by_agent1	0-delivery_by_agent1	0-STAY_by_agent1	0-sparse_r_by_agent1	1-put_onion_on_X_by_agent0	1-put_dish_on_X_by_agent0	1-put_soup_on_X_by_agent0	1-pickup_onion_from_X_by_agent0	1-pickup_onion_from_O_by_agent0	1-pickup_dish_from_X_by_agent0	1-pickup_dish_from_D_by_agent0	1-pickup_soup_from_X_by_agent0	1-USEFUL_DISH_PICKUP_by_agent0	1-SOUP_PICKUP_by_agent0	1-PLACEMENT_IN_POT_by_agent0	1-delivery_by_agent0	1-STAY_by_agent0	1-sparse_r_by_agent0
1	9.88	0	0	10.09	3.05	0	0	7.34	0	0	3	7.09	85.85	141.8	6.47	1.23	6.59	23.69	3.33	1.17	6.81	0.73	6.52	6.64	20.49	0	57.14	0
2	0.01	0.11	0	0	33.99	11.11	0	0	0	11	33	11	35.65	220	0.01	12.89	7.9	0	25.36	1.89	18.98	0.05	13.41	7.9	24.95	0	26.16	0
3	0.59	0.05	0.01	0.5	26.95	8.91	0	7.96	0	8.58	26.85	16.19	40.84	323.8	0.19	10.77	8.72	0.09	18.09	1.58	15.02	3.28	14.79	5.56	17.86	0	29.18	0
4	0	0.01	0	0	27	9	0	8	0	8.96	27	16	26.91	320	0.05	11.65	6.98	0.03	22.94	0.63	18.01	0	17.91	6.98	22.61	0	27.26	0
5	0.07	1.73	0.05	0.01	26.58	9.96	0	6.92	0	7.99	26.43	14.79	34.77	295.8	1.94	0.04	6.18	19.76	2.46	0.02	6.77	0.42	6.66	6.75	20.28	0	38.52	0
6	0.02	0.4	0	0	33.91	11.39	0	0	0	10.99	33	10.97	31.64	219.4	0.1	11.56	7.96	0.05	25.47	0.44	19.16	0.02	10.16	7.95	24.82	0	25.49	0
7	0	0.63	0.01	0	33.58	11.63	0	7.02	0	10.91	33	17.84	20.5	356.8	0.04	12.35	7.01	0.04	23.25	1.37	17.99	0.03	17.92	6.98	22.94	0	17.58	0
8	0.01	0.08	0	0	33.98	11.08	0	0	0	11	33	11	35.09	220	0	1.76	7.88	0	25.29	1.76	8.01	0.13	7.99	7.99	24.99	0	30.07	0
9	0	0	0	0	26.97	8.98	0	8	0	8.94	26.97	16.83	30.46	336.6	0.53	9.51	4.61	0.32	15.27	0.65	13.95	0.11	13.83	4.61	14.93	0	51.35	0
10	0.01	0.4	0	0	33.83	11.4	0	0	0	11	33	11	35.66	220	0.03	12.01	7.02	0.02	23.06	1	18.1	0.02	18.08	7	22.78	0	34.38	0
11	0	1.08	0	0	33.73	12.08	0	0	0	11	33	10.96	38.84	219.2	0	14.37	7.02	0	21.98	2.8	18.84	0.05	18.82	6.97	21.95	0	39.33	0
13	0.01	0	0	0	27.01	9	0	8	0	8.99	27	16.99	33.37	339.8	0.03	14.4	7.05	0.02	24.01	3.44	18.77	0.02	18.69	7.14	24	0	25.55	0
14	0.02	0.01	0	0.01	27.01	9.01	0	8	0	8.98	27	16.96	26.79	339.2	0.33	8.38	6.14	0.1	20.16	0.83	14.03	0.18	13.41	5.98	19.79	0	25.3	0
15	11.5	0	0.01	11.78	3.06	0	0	7.35	0	0	3	7.14	53.94	142.8	0.01	0.19	9.94	29.8	2.93	0.03	11.03	0	10.14	9.95	32.7	0	55.39	0
16	0.03	1.62	0	0.02	33.91	12.62	0	0	0	11	33	10.99	32.25	219.8	0	2.88	8	0	27	2.88	8.99	0	8.99	8	26.99	0	28.09	0
17	15.32	0	0.01	15.55	3.63	0	0	6.38	0	0	3	6.37	76.62	127.4	0.02	0.64	6.07	17.53	3.49	0.64	7	0.07	7	7	21	0	35.54	0
18	0.11	0.04	0	0.05	33.04	10.44	0	7.42	0	10.04	32.98	17.34	15.33	346.8	0.05	11.67	8.15	0.05	24.43	0.68	19	0.45	18.94	7.85	24.04	0	21.89	0
19	0.01	0.79	0	0	33.95	11.79	0	0	0	11	33	11	31.38	220	0.47	12.68	5.11	0.43	17.93	1.66	16.92	0.11	16.7	5.16	17.83	0	38.15	0
20	0	0.32	0	0	33.98	11.32	0	0	0	11	33	11	32.46	220	0	2.99	8	0	27	2.99	9	0	9	8	27	0	30.51	0
22	0	0.76	0	0	34	11.76	0	0	0	11	33	11	25.84	220	0	1.53	8	0	27	1.53	9	0	9	8	27	0	34.35	0
23	0	0.75	0	0	33.99	11.75	0	0	0	11	33	11	28.68	220	0	0.53	8.07	0	25.28	0.53	8.01	0.35	8.01	7.98	25	0	29.54	0
24	0	0.35	0	0	33.96	11.35	0	0	0	11	33	10.99	35.57	219.8	0	0.02	8	0	27	0.02	8.95	0	8.95	8	27	0	12.5	0
25	0.05	0.08	0	0.02	33.86	11.08	0	0	0	11	33	10.99	38.36	219.8	0	2.69	8	0	27	2.69	9	0	8.99	8	27	0	40.65	0
26	0	0	0	0	27	9	0	8	0	9	27	17	36.68	340	0.05	11.38	7.89	0.02	24.22	0.68	18.96	0	18.88	7.91	24.04	0	23.5	0
27	0	0.38	0	0	33.93	11.39	0	0	0	11	33	11	39.26	220	0.18	12.51	7.94	0.17	24.9	1.49	18.97	0	11	7.95	24.72	0	31.52	0
28	0.01	0.01	0	0	27.01	9.01	0	8	0	8.94	27	16	54.01	320	0	13.32	6.99	0	22.17	1.43	18.95	0	18.94	6.99	22.01	0	23.1	0
30	9.17	0	0.01	9.26	3.05	0	0	7.83	0	0	3	7.26	86.61	145.2	0.01	2.41	10.01	30.88	2.01	2.35	10.58	0.04	10.37	9.97	32.87	0	46.81	0
32	0	0.09	0	0	33.36	11.07	0	7.03	0	10.85	33	17.63	18.75	352.6	0	13.25	7.83	0	24.6	2.27	18.96	0	18.94	7.95	24.08	0	28.06	0
33	0.01	0	0	0	27.01	9	0	8	0	8.92	27	16	43.51	320	0	15.25	7	0	23.67	4.25	18.02	0	18.02	7	22.99	0	27.67	0
34	0	0	0.01	0	27	9	0	8.01	0	8.99	27	16.98	37.52	339.6	0	11.96	7.12	0	21.92	0.5	18.55	0.39	18.43	6.99	21.71	0	27.54	0
35	0.02	1.07	0	0	33.94	12.07	0	0	0	11	33	11	38.7	220	0.01	13.81	6.98	0.02	22.49	2.19	18.74	0	18.59	6.98	22.28	0	30.93	0
37	0	0.02	0	0	33.94	11.01	0	7	0	10.97	33	17.97	22.6	359.4	0.01	11.44	7.77	0	24.01	1.2	18.23	0.05	18.18	7.77	24	0	20.77	0
40	0.02	0.47	0	0.01	34	11.47	0	0	0	10.99	33	10.99	17.51	219.8	0.08	4.81	8	0.08	26.99	4.81	8.99	0	8.99	8	26.99	0	29	0
41	0.1	0.21	0.17	0.08	33.23	11.15	0	7.19	0	10.74	32.97	17.51	21.55	350.2	0.03	12.09	7.9	0.01	24.15	1.39	18.94	0	18.6	7.93	24.02	0	27.22	0
42	0.15	0.05	0.03	0.04	33.02	10.56	0	7.44	0	10.23	32.91	17.37	19.44	347.4	0	12.28	7.81	0	24.1	1.35	18.95	0.46	18.85	7.71	24.01	0	25.18	0
43	0.01	0.03	0	0	33.78	11.03	0	0	0	11	33	11	46.12	220	0.09	12.93	8.39	0.08	24.43	1.92	18.99	0.68	18.97	7.9	23.99	0	18.65	0
48	0	0.04	0.01	0	33.9	11.01	0	0	0	10.97	32.91	10.96	22.28	219.2	0	0.79	8	0	26.97	0.78	9	0	8.95	8	26.97	0	33.31	0
51	0.05	0.1	0.13	0.02	32.94	10.95	0	7.09	0	10.79	32.76	17.45	22.39	349	0.06	12.03	7.11	0.02	24.02	1.07	18.85	0.01	18.67	7.33	23.94	0	18.32	0
52	0.04	0.28	0.03	0.02	33.03	11.12	0	7.02	0	10.28	32.93	17.13	19.11	342.6	0.17	14.17	7.89	0.16	24.72	3.15	19	0.01	18.84	7.92	24.09	0	14.94	0
53	0.15	0.61	0	0.02	33.97	11.61	0	0	0	10.99	33	10.98	34.21	219.6	0.81	0.99	7.65	1.97	21.9	0.99	7.18	0.83	7.18	6.97	22.8	0	27.13	0
54	13.78	0.02	0.02	13.91	3.12	0.02	0	7.53	0	0	3	7.22	82.07	144.4	0.03	0.01	6.03	17.22	3.81	0.01	7	0.03	7	7	21	0	42.79	0
